# Supplementary material
Source: PubMed Central journal article supplement (PMC6037129)
Supplement: mmc1.pdf [file mmc1.pdf]

**Supplemental Information**

**Dominant-Negative TGF- $\beta$  Receptor Enhances  
PSMA-Targeted Human CAR T Cell Proliferation  
And Augments Prostate Cancer Eradication**

**Christopher C. Kloss, Jihyun Lee, Aaron Zhang, Fang Chen, Jan Joseph Melenhorst, Simon F. Lacey, Marcela V. Maus, Joseph A. Fraietta, Yangbing Zhao, and Carl H. June**

**Supplemental Figure 1. Whole transcriptome microarray hierarchical clustergram analysis of dnTGFβRII expressing PSMA CAR T cells.** Total live T cell mRNA was analyzed after 7 days (**A**), 14 days (**B**), and 21 days (**C**) of PC3-PSMA tumor cell coculture with T cells from 1) PBBZ group (Orange) or 2) PBBZ + dnTGFβRII (Green). Clustergram analysis clusters significantly differentially expressed genes into similar pathways. The scalebar indicates the level expression of individual genes.

**A** D7 Pbbz vs.  
dnTGFBRII-T2A-Pbbz

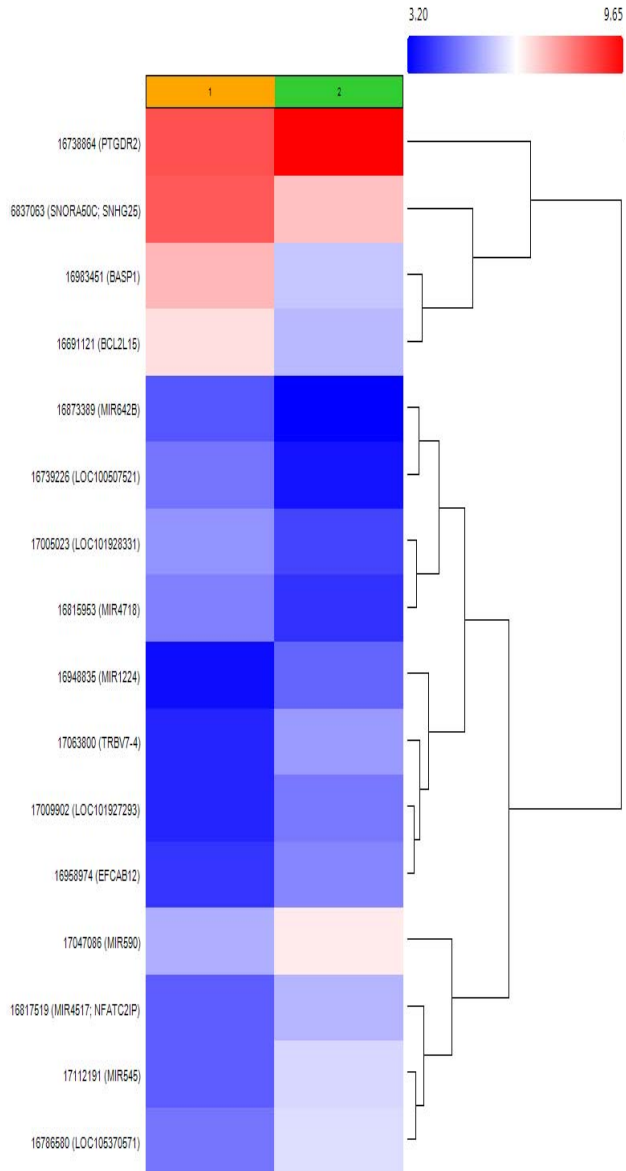

**B** D14 Pbbz vs.  
dnTGFBRII-T2A-Pbbz

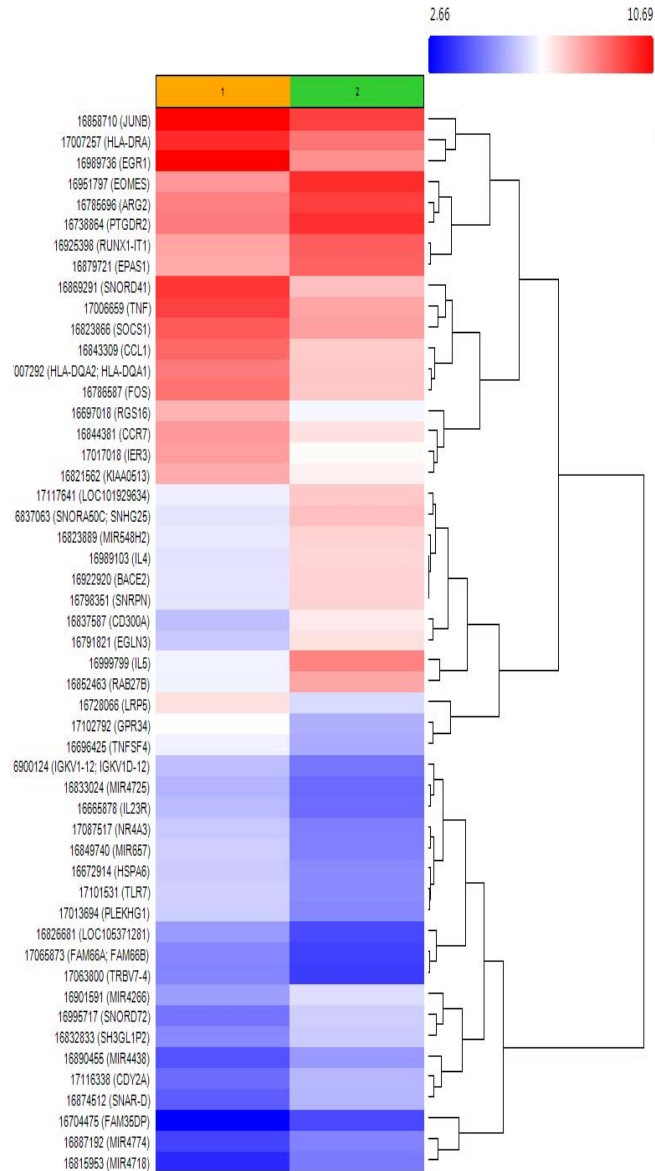

**C** D21 Pbbz vs.  
dnTGFBRII-T2A-Pbbz

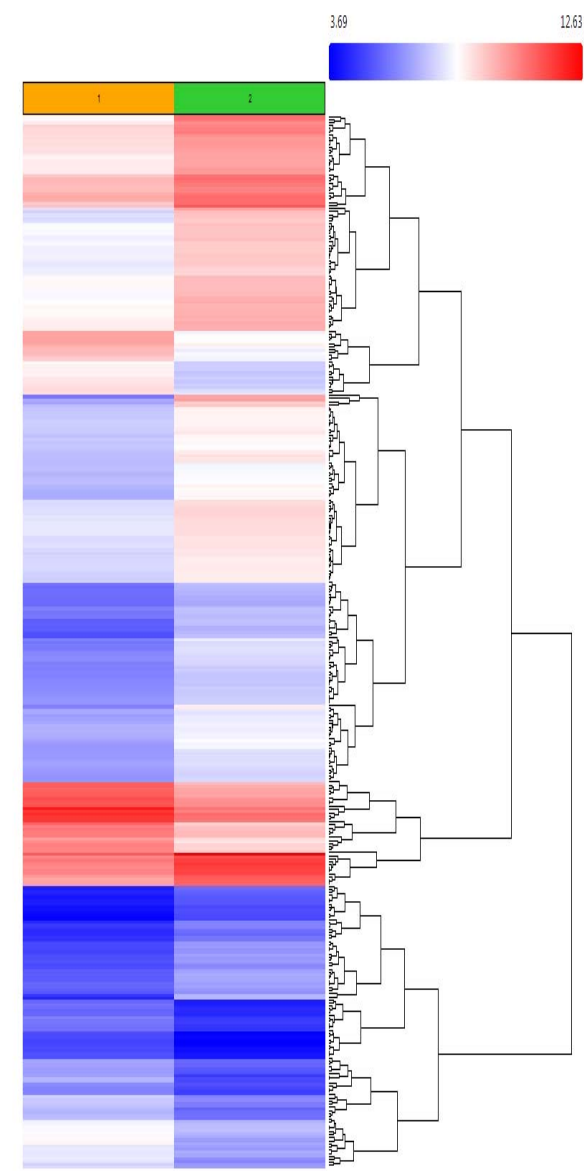

Supplemental Table 1.

| Day 7      |             |                   | Day 14     |             |                     | Day 21     |             |                |
|------------|-------------|-------------------|------------|-------------|---------------------|------------|-------------|----------------|
| Gene/MIR # | Fold Change | Gene Symbol       | Gene/MIR # | Fold Change | Gene Symbol         | Gene/MIR # | Fold Change | Gene Symbol    |
| 1          | 2.98        | MIR545            | 1          | 4.46        | IL5                 | 1          | 15.05       | IL5            |
| 2          | 2.87        | TRBV7-4           | 2          | 3.24        | EOMES               | 2          | 8.81        | IL13           |
| 3          | 2.51        | LOC105370571      | 3          | 2.98        | RAB27B              | 3          | 6.29        | APOD           |
| 4          | 2.39        | MIR590            | 4          | 2.71        | SNORD72             | 4          | 5.91        | IL4            |
| 5          | 2.19        | MIR4517; NFATC2IP | 5          | 2.68        | SNAR-D              | 5          | 5.39        | EGR1           |
| 6          | 2.17        | MIR1224           | 6          | 2.63        | SNORA50C; SNHG25    | 6          | 5.07        | EPAS1          |
| 7          | 2.08        | LOC101927293      | 7          | 2.52        | CD300A              | 7          | 4.63        | SLCO4C1        |
| 8          | 2.04        | PTGDR2            | 8          | 2.5         | EGLN3               | 8          | 4.44        | LIF            |
| 9          | 2.04        | EFCAB12           | 9          | 2.45        | MIR4718             | 9          | 4.35        | RAB27B         |
| 10         | -2.01       | LOC101928331      | 10         | 2.28        | PTGDR2              | 10         | 4.03        | LOC101928173   |
| 11         | -2.03       | MIR4718           | 11         | 2.28        | CDY2A               | 11         | 3.96        | IFNG           |
| 12         | -2.15       | MIR642B           | 12         | 2.2         | MIR4438             | 12         | 3.9         | SLC7A8         |
| 13         | -2.36       | LOC100507521      | 13         | 2.2         | FAM35DP             | 13         | 3.76        | RNU5D-1        |
| 14         | -2.43       | BCL2L15           | 14         | 2.19        | EPAS1               | 14         | 3.57        | DUSP6          |
| 15         | -2.51       | SNORA50C; SNHG25  | 15         | 2.15        | IL4                 | 15         | 3.57        | OSM            |
| 16         | -3.09       | BASP1             | 16         | 2.15        | BACE2               | 16         | 3.49        | TNFSF15        |
|            |             |                   | 17         | 2.15        | SNRPN               | 17         | 3.48        | CSF2           |
|            |             |                   | 18         | 2.12        | RUNX1-IT1           | 18         | 3.33        | LOC100505478   |
|            |             |                   | 19         | 2.12        | LOC101929634        | 19         | 3.27        | IL3RA          |
|            |             |                   | 20         | 2.07        | MIR548H2            | 20         | 3.25        | IL17RB         |
|            |             |                   | 21         | 2.05        | MIR4774             | 21         | 3.21        | GIN52          |
|            |             |                   | 22         | 2.04        | SH3GL1P2            | 22         | 3.2         | IL3RA          |
|            |             |                   | 23         | 2.03        | ARG2                | 23         | 3.2         | FAM72D; FAM72C |
|            |             |                   | 24         | 2.02        | MIR4266             | 24         | 3.2         | PTGS2          |
|            |             |                   | 25         | -2.01       | HSPA6               | 25         | 3.17        | TP73           |
|            |             |                   | 26         | -2.04       | JUNB                | 26         | 3.15        | ARG2           |
|            |             |                   | 27         | -2.04       | LRP5                | 27         | 3.15        | HIST1H2BE      |
|            |             |                   | 28         | -2.07       | SOCS1               | 28         | 3.07        | CCNA1          |
|            |             |                   | 29         | -2.14       | TLR7                | 29         | 3.07        | IL1A           |
|            |             |                   | 30         | -2.16       | TNFSF4 (AKA OX4C)   | 30         | 3.03        | IFI30          |
|            |             |                   | 31         | -2.16       | KIAA0513            | 31         | 3.03        | HIST1H2BM      |
|            |             |                   | 32         | -2.18       | CCR7                | 32         | 3.01        | MCOLN3         |
|            |             |                   | 33         | -2.18       | FAM66A; FAM66B      | 33         | 2.99        | HIST1H2AJ      |
|            |             |                   | 34         | -2.19       | PLEKHG1             | 34         | 2.98        | CENPN          |
|            |             |                   | 35         | -2.22       | HLA-DRA             | 35         | 2.98        | DSCC1          |
|            |             |                   | 36         | -2.24       | IGKV1-12; IGKV1D-12 | 36         | 2.97        | CCL3           |
|            |             |                   | 37         | -2.25       | NR4A3               | 37         | 2.92        | CRLF2          |
|            |             |                   | 38         | -2.26       | TRBV7-4             | 38         | 2.84        | CPM            |
|            |             |                   | 39         | -2.29       | HLA-DQA2; HLA-DQA1  | 39         | 2.81        | CDC20B         |
|            |             |                   | 40         | -2.32       | MIR4725             | 40         | 2.78        | GPAT3          |
|            |             |                   | 41         | -2.37       | IL23R               | 41         | 2.78        | CD86           |
|            |             |                   | 42         | -2.38       | MIR657              | 42         | 2.78        | PBK            |
|            |             |                   | 43         | -2.38       | GPR34               | 43         | 2.77        | FAM72A         |
|            |             |                   | 44         | -2.44       | LOC105371281        | 44         | 2.77        | MT1G           |
|            |             |                   | 45         | -2.5        | RGS16               | 45         | 2.76        | APOO           |
|            |             |                   | 46         | -2.51       | FOS                 | 46         | 2.73        | RNVU1-14       |
|            |             |                   | 47         | -2.78       | IER3                | 47         | 2.71        | LOC100240735   |
|            |             |                   | 48         | -2.87       | CCL1                | 48         | 2.7         | SPC24          |
|            |             |                   | 49         | -2.95       | TNF                 | 49         | 2.7         | SGOL1          |
|            |             |                   | 50         | -4.48       | SNORD41             | 50         | 2.68        | CDK1           |
|            |             |                   | 51         | -4.76       | EGR1                | 51         | 2.68        | MIR221         |
|            |             |                   |            |             |                     | 52         | 2.67        | CCL3L3; CCL3L1 |
|            |             |                   |            |             |                     | 53         | 2.65        | UBE2T          |
|            |             |                   |            |             |                     | 54         | 2.64        | SAMD5          |
|            |             |                   |            |             |                     | 55         | 2.62        | PTPN14         |
|            |             |                   |            |             |                     | 56         | 2.61        | CLECL1         |
|            |             |                   |            |             |                     | 57         | 2.61        | CDC20          |
|            |             |                   |            |             |                     | 58         | 2.61        | CDC6           |
|            |             |                   |            |             |                     | 59         | 2.6         | HPGDS          |
|            |             |                   |            |             |                     | 60         | 2.6         | CDKN3          |

|     |                    |
|-----|--------------------|
| 61  | 2.6 TK1            |
| 62  | 2.6 OSBPL6         |
| 63  | 2.58 ITGA11        |
| 64  | 2.57 ASF1B         |
| 65  | 2.57 GUCY1B3       |
| 66  | 2.55 CCL1          |
| 67  | 2.55 CLSPN         |
| 68  | 2.55 HIST1H3H      |
| 69  | 2.55 HIST1H3G      |
| 70  | 2.54 SHCBP1        |
| 71  | 2.54 SPC25         |
| 72  | 2.54 LRRCC1        |
| 73  | 2.53 SPAG5         |
| 74  | 2.53 GINS4         |
| 75  | 2.5 TRAV9-1        |
| 76  | 2.5 C17orf58       |
| 77  | 2.5 DMC1           |
| 78  | 2.5 RPL39L         |
| 79  | 2.49 PLK1          |
| 80  | 2.48 PLPP1         |
| 81  | 2.48 CSAG3; CSAG2  |
| 82  | 2.48 CSAG3; CSAG2  |
| 83  | 2.48 SIGLEC17P     |
| 84  | 2.48 IFITM3        |
| 85  | 2.48 SKA1          |
| 86  | 2.48 HIST1H2AI     |
| 87  | 2.47 HBEGF         |
| 88  | 2.47 MTFR2         |
| 89  | 2.46 LOC105375905  |
| 90  | 2.46 HIST1H3J      |
| 91  | 2.44 CCNB1         |
| 92  | 2.43 DEPDC1        |
| 93  | 2.42 IL1RL1        |
| 94  | 2.42 GZMK          |
| 95  | 2.41 EXO1          |
| 96  | 2.41 CEP55         |
| 97  | 2.41 FOSL1         |
| 98  | 2.4 MYBL1          |
| 99  | 2.38 MYBL2         |
| 100 | 2.38 CCNE2         |
| 101 | 2.37 ESCO2         |
| 102 | 2.36 DTL           |
| 103 | 2.36 CENPW         |
| 104 | 2.35 KIF14         |
| 105 | 2.35 HIST1H4B      |
| 106 | 2.35 CDR1          |
| 107 | 2.33 LINC01123     |
| 108 | 2.33 MT2A          |
| 109 | 2.33 TNF           |
| 110 | 2.32 GAB2          |
| 111 | 2.32 RAD54L        |
| 112 | 2.32 SOCS1         |
| 113 | 2.32 CRNDE         |
| 114 | 2.32 NQO1          |
| 115 | 2.31 STX3; OR10Y1P |
| 116 | 2.31 XRCC2         |
| 117 | 2.3 PMCH           |
| 118 | 2.3 CCL4L2; CCL4L1 |
| 119 | 2.29 MYO1B         |
| 120 | 2.28 BACE2         |
| 121 | 2.28 SMAGP         |
| 122 | 2.28 CCNB2         |
| 123 | 2.27 LOC101928865  |
| 124 | 2.27 GZMB          |

|     |                       |
|-----|-----------------------|
| 125 | 2.27 KIAA0101         |
| 126 | 2.27 SIGLEC6          |
| 127 | 2.27 CENPU            |
| 128 | 2.27 CENPH            |
| 129 | 2.27 HIST1H2BF        |
| 130 | 2.26 FAM111B          |
| 131 | 2.25 SPP1             |
| 132 | 2.25 LOC105370594     |
| 133 | 2.24 FOXM1            |
| 134 | 2.24 TUBA1B; TUBA1A   |
| 135 | 2.24 CCL4             |
| 136 | 2.24 KIR3DL2; KIR3DL1 |
| 137 | 2.23 ZWINT            |
| 138 | 2.23 SKA3             |
| 139 | 2.23 LINC01106        |
| 140 | 2.23 CDC45            |
| 141 | 2.23 DTHD1            |
| 142 | 2.23 HMGN5            |
| 143 | 2.22 TYMS             |
| 144 | 2.22 MAD2L1           |
| 145 | 2.22 HIST1H2BL        |
| 146 | 2.21 TOM1L1           |
| 147 | 2.21 CREG1            |
| 148 | 2.21 KLF5             |
| 149 | 2.21 HIST1H1B         |
| 150 | 2.21 ANLN             |
| 151 | 2.21 CLU; MIR6843     |
| 152 | 2.2 KLHL11            |
| 153 | 2.2 FCER1G            |
| 154 | 2.2 ORC1              |
| 155 | 2.2 MIR3665           |
| 156 | 2.19 TRBV7-4          |
| 157 | 2.19 SPOCK1           |
| 158 | 2.19 PRR11            |
| 159 | 2.19 RRM2             |
| 160 | 2.19 UBE2C            |
| 161 | 2.18 ORC6             |
| 162 | 2.17 ICAM1            |
| 163 | 2.17 STX11            |
| 164 | 2.17 CD9              |
| 165 | 2.17 MCM10            |
| 166 | 2.17 HIST1H3F         |
| 167 | 2.17 MELK             |
| 168 | 2.16 GAS2L3           |
| 169 | 2.16 NPC2; MIR4709    |
| 170 | 2.16 LOC105371152     |
| 171 | 2.16 DONSON           |
| 172 | 2.15 PDLIM5           |
| 173 | 2.15 RAB23            |
| 174 | 2.14 KCCAT198         |
| 175 | 2.14 CCNE1            |
| 176 | 2.14 KIF20A           |
| 177 | 2.14 DEPDC1B          |
| 178 | 2.13 NDC80            |
| 179 | 2.12 TMPO-AS1         |
| 180 | 2.12 KIF23            |
| 181 | 2.12 TPMT             |
| 182 | 2.11 DCLRE1B          |
| 183 | 2.11 PLA2G4A          |
| 184 | 2.11 DLGAP5           |
| 185 | 2.1 CDCA8             |
| 186 | 2.1 NUF2              |
| 187 | 2.1 ESPL1             |
| 188 | 2.1 TICRR             |

|     |                                                                |
|-----|----------------------------------------------------------------|
| 189 | 2.1 HMMR                                                       |
| 190 | 2.1 CENPQ                                                      |
| 191 | 2.09 NEK2                                                      |
| 192 | 2.09 DIAPH3                                                    |
| 193 | 2.09 RAD51                                                     |
| 194 | 2.09 BIRC5                                                     |
| 195 | 2.09 RNF130                                                    |
| 196 | 2.09 SPAG1                                                     |
| 197 | 2.08 FEN1; FADS2                                               |
| 198 | 2.07 BRCA2                                                     |
| 199 | 2.07 GINS1                                                     |
| 200 | 2.06 TLCD2                                                     |
| 201 | 2.06 BCRP3                                                     |
| 202 | 2.06 NCAPH                                                     |
| 203 | 2.05 CDC7                                                      |
| 204 | 2.05 GATA3-AS1                                                 |
| 205 | 2.05 EME1                                                      |
| 206 | 2.05 PSMC3IP                                                   |
| 207 | 2.05 TMEM237                                                   |
| 208 | 2.05 ECT2                                                      |
| 209 | 2.05 TTK                                                       |
| 210 | 2.04 YES1                                                      |
| 211 | 2.04 ANPEP                                                     |
| 212 | 2.04 RFC5                                                      |
| 213 | 2.04 CLN6                                                      |
| 214 | 2.04 CDT1                                                      |
| 215 | 2.04 PMAIP1                                                    |
| 216 | 2.04 BHLHE40-AS1                                               |
| 217 | 2.04 NCAPG                                                     |
| 218 | 2.04 MND1                                                      |
| 219 | 2.04 CCNA2                                                     |
| 220 | 2.04 TRGV3; TRGC2                                              |
| 221 | 2.03 ETV7                                                      |
| 222 | 2.03 AURKB                                                     |
| 223 | 2.03 TLR3                                                      |
| 224 | 2.02 CLEC7A                                                    |
| 225 | 2.02 IRX3                                                      |
| 226 | 2.02 RNVU1-3                                                   |
| 227 | 2.02 RNVU1-3                                                   |
| 228 | 2.02 TMTC1                                                     |
| 229 | 2.02 CD200                                                     |
| 230 | 2.02 PEX5L                                                     |
| 231 | 2.02 SLC7A11                                                   |
| 232 | 2.02 CENPP                                                     |
| 233 | 2.01 CDCA5                                                     |
| 234 | 2.01 E2F7                                                      |
| 235 | 2.01 GOLGA8J                                                   |
| 236 | 2.01 CDCA2                                                     |
| 237 | -2.01 SNORD61; RBMX                                            |
| 238 | -2.01 KLRC2; KLRC3                                             |
| 239 | -2.02 GUSBP3                                                   |
| 240 | -2.03 PLCG1; RPL23AP81                                         |
| 241 | -2.03 TAS2R31                                                  |
| 242 | -2.03 SNORD116-6                                               |
| 243 | -2.04 RNU6-82P                                                 |
| 244 | -2.04 SNORD116-19; SNORD116-17<br>SNORD116-19;<br>SNORD116-17; |
| 245 | -2.04 SNRPN; IPW                                               |
| 246 | -2.04 USP6                                                     |
| 247 | -2.06 PWAR5; SNORD108                                          |
| 248 | -2.06 ERMN                                                     |
| 249 | -2.06 MIR1234; CPSF1                                           |
| 250 | -2.07 PPIAL4E; PPIAL4D; PPIAL4F                                |

|     |                           |
|-----|---------------------------|
| 251 | -2.07 SNORD116-2          |
| 252 | -2.08 POM121L8P           |
| 253 | -2.09 ABLIM1              |
| 254 | -2.1 SNORA12              |
| 255 | -2.1 SORL1                |
| 256 | -2.1 SCARNA11             |
| 257 | -2.1 CCDC141              |
| 258 | -2.11 LOC105371220        |
| 259 | -2.11 PLXNA4              |
| 260 | -2.12 IGKV1-12; IGKV1D-12 |
| 261 | -2.12 CD44                |
| 262 | -2.12 RNU4ATAC            |
| 263 | -2.12 SNORA9; SNHG15      |
| 264 | -2.13 SNORA50A            |
| 265 | -2.13 MIR766              |
| 266 | -2.15 B3GALT2             |
| 267 | -2.15 DPRXP4              |
| 268 | -2.17 SPNS3               |
| 269 | -2.17 GPR155              |
| 270 | -2.17 MIR4253             |
| 271 | -2.17 KRT16P3             |
| 272 | -2.17 LOC100128751        |
| 273 | -2.18 ANKRD44-IT1         |
| 274 | -2.19 SNORD46             |
| 275 | -2.22 SNORD91B            |
| 276 | -2.23 MIR4729             |
| 277 | -2.23 AQP7                |
| 278 | -2.25 SNORD71             |
| 279 | -2.26 MIR601              |
| 280 | -2.27 MIR4506             |
| 281 | -2.3 SCARNA5              |
| 282 | -2.33 PRKXP1              |
| 283 | -2.35 SNORD111            |
| 284 | -2.35 SNORD116-24         |
| 285 | -2.35 SNORA80A            |
| 286 | -2.35 NPIP11              |
| 287 | -2.37 RNU6-79P            |
| 288 | -2.37 SNORD60             |
| 289 | -2.41 LOC105379251        |
| 290 | -2.42 AMICA1              |
| 291 | -2.42 SCARNA3             |
| 292 | -2.43 SPRR2F              |
| 293 | -2.44 MIR548AL            |
| 294 | -2.44 TPT1                |
| 295 | -2.44 SCARNA10            |
| 296 | -2.46 SNORD17             |
| 297 | -2.46 SNORA14A            |
| 298 | -2.46 LOC100131541        |
| 299 | -2.48 SNORA57; METTL12    |
| 300 | -2.51 UBE2CP5             |
| 301 | -2.54 SNORA71A            |
| 302 | -2.58 LOC100506123        |
| 303 | -2.58 SLAMF8              |
| 304 | -2.59 SNORA2A             |
| 305 | -2.62 TTN                 |
| 306 | -2.62 ABCG1               |
| 307 | -2.63 TRAJ25              |
| 308 | -2.64 TRAJ1               |
| 309 | -2.64 RBMS3               |
| 310 | -2.72 TRAJ19              |
| 311 | -2.74 SNORA38B            |
| 312 | -2.76 SLC14A1             |
| 313 | -2.78 TRAJ14              |
| 314 | -2.79 MPP7                |



|     |                        |
|-----|------------------------|
| 315 | -2.85 SNORA71D         |
| 316 | -2.87 NUAK2            |
| 317 | -2.96 SNORD15B         |
| 318 | -2.98 SCARNA6          |
| 319 | -2.99 PIK3IP1          |
| 320 | -3 SNORA2C; MIR1291    |
| 321 | -3.04 PLCG1            |
| 322 | -3.04 SNORD3D          |
| 323 | -3.18 SNORA54          |
| 324 | -3.3 IGANRP            |
| 325 | -3.32 NELL2            |
| 326 | -3.5 SNORA60           |
| 327 | -3.59 SNORA10; RPS2    |
| 328 | -3.61 MIR1299          |
| 329 | -3.68 MIR1203          |
| 330 | -3.76 SNORA50C; SNHG25 |
| 331 | -4.06 SNORA23          |

**Supplemental Table 2. KEGG Analysis, day 14**

| #pathway ID | Pathway description                          | Observed gene count | False discovery rate | Matching proteins in your network                                 |
|-------------|----------------------------------------------|---------------------|----------------------|-------------------------------------------------------------------|
| 5321        | Inflammatory bowel disease (IBD)             | 8                   | 1.71E-10             | HLA-DQA2,HLA-DRA,IL23R,IL4,IL4R,IL5,JUN,TNF                       |
| 4060        | Cytokine-cytokine receptor interaction       | 11                  | 6.52E-10             | CCL1,CCR7,IL23R,IL4,IL4R,IL5,TNF,TNFRSF1A,TNFRSF1B,TNFRSF4,TNFSF4 |
| 4380        | Osteoclast differentiation                   | 8                   | 1.58E-08             | FOS,FOSL2,JUN,JUNB,JUND,SOCS1,TNF,TNFRSF1A                        |
| 5310        | Asthma                                       | 5                   | 2.20E-07             | HLA-DQA2,HLA-DRA,IL4,IL5,TNF                                      |
| 5140        | Leishmaniasis                                | 6                   | 3.74E-07             | FOS,HLA-DQA2,HLA-DRA,IL4,JUN,TNF                                  |
| 5330        | Allograft rejection                          | 5                   | 4.10E-07             | HLA-DQA2,HLA-DRA,IL4,IL5,TNF                                      |
| 5164        | Influenza A                                  | 7                   | 2.11E-06             | HLA-DQA2,HLA-DRA,HSPA6,JUN,TLR7,TNF,TNFRSF1A                      |
| 4668        | TNF signaling pathway                        | 6                   | 3.14E-06             | FOS,JUN,JUNB,TNF,TNFRSF1A,TNFRSF1B                                |
| 5145        | Toxoplasmosis                                | 6                   | 3.88E-06             | HLA-DQA2,HLA-DRA,HSPA6,SOCS1,TNF,TNFRSF1A                         |
| 4640        | Hematopoietic cell lineage                   | 5                   | 2.24E-05             | HLA-DRA,IL4,IL4R,IL5,TNF                                          |
| 5166        | HTLV-I infection                             | 7                   | 2.24E-05             | EGR1,FOS,HLA-DQA2,HLA-DRA,JUN,TNF,TNFRSF1A                        |
| 5323        | Rheumatoid arthritis                         | 5                   | 2.24E-05             | FOS,HLA-DQA2,HLA-DRA,JUN,TNF                                      |
| 5168        | Herpes simplex infection                     | 6                   | 3.60E-05             | FOS,HLA-DQA2,HLA-DRA,JUN,TNF,TNFRSF1A                             |
| 4660        | T cell receptor signaling pathway            | 5                   | 3.89E-05             | FOS,IL4,IL5,JUN,TNF                                               |
| 4672        | Intestinal immune network for IgA production | 4                   | 4.13E-05             | HLA-DQA2,HLA-DRA,IL4,IL5                                          |
| 5320        | Autoimmune thyroid disease                   | 4                   | 6.00E-05             | HLA-DQA2,HLA-DRA,IL4,IL5                                          |
| 5211        | Renal cell carcinoma                         | 4                   | 0.000166             | ARNT,EGLN3,EPAS1,JUN                                              |
| 4612        | Antigen processing and presentation          | 4                   | 0.000177             | HLA-DQA2,HLA-DRA,HSPA6,TNF                                        |
| 4010        | MAPK signaling pathway                       | 6                   | 0.000202             | FOS,HSPA6,JUN,JUND,TNF,TNFRSF1A                                   |
| 4630        | Jak-STAT signaling pathway                   | 5                   | 0.000248             | IL23R,IL4,IL4R,IL5,SOCS1                                          |
| 5322        | Systemic lupus erythematosus                 | 4                   | 0.000615             | HLA-DQA2,HLA-DRA,SNRPD1,TNF                                       |
| 5142        | Chagas disease (American trypanosomiasis)    | 4                   | 0.000637             | FOS,JUN,TNF,TNFRSF1A                                              |
| 5200        | Pathways in cancer                           | 6                   | 0.000653             | ARNT,EGLN3,EPAS1,FOS,JUN,RUNX1T1                                  |
| 4620        | Toll-like receptor signaling pathway         | 4                   | 0.000684             | FOS,JUN,TLR7,TNF                                                  |
| 5332        | Graft-versus-host disease                    | 3                   | 0.000684             | HLA-DQA2,HLA-DRA,TNF                                              |
| 4940        | Type I diabetes mellitus                     | 3                   | 0.000894             | HLA-DQA2,HLA-DRA,TNF                                              |
| 5014        | Amyotrophic lateral sclerosis (ALS)          | 3                   | 0.00168              | TNF,TNFRSF1A,TNFRSF1B                                             |
| 4664        | Fc epsilon RI signaling pathway              | 3                   | 0.0037               | IL4,IL5,TNF                                                       |
| 4920        | Adipocytokine signaling pathway              | 3                   | 0.00373              | TNF,TNFRSF1A,TNFRSF1B                                             |
| 5133        | Pertussis                                    | 3                   | 0.00394              | FOS,JUN,TNF                                                       |
| 5152        | Tuberculosis                                 | 4                   | 0.00408              | HLA-DQA2,HLA-DRA,TNF,TNFRSF1A                                     |
| 5169        | Epstein-Barr virus infection                 | 4                   | 0.00589              | HLA-DQA2,HLA-DRA,HSPA6,JUN                                        |
| 4915        | Estrogen signaling pathway                   | 3                   | 0.00856              | FOS,HSPA6,JUN                                                     |
| 3040        | Spliceosome                                  | 3                   | 0.019                | HSPA6,SNRPD1,SNRPF                                                |
| 5162        | Measles                                      | 3                   | 0.0206               | HSPA6,IL4,TLR7                                                    |
| 5161        | Hepatitis B                                  | 3                   | 0.0248               | FOS,JUN,TNF                                                       |
| 4932        | Non-alcoholic fatty liver disease (NAFLD)    | 3                   | 0.0282               | JUN,TNF,TNFRSF1A                                                  |
| 4930        | Type II diabetes mellitus                    | 2                   | 0.0305               | SOCS1,TNF                                                         |
| 5010        | Alzheimer s disease                          | 3                   | 0.0354               | BACE2,TNF,TNFRSF1A                                                |
| 5202        | Transcriptional misregulation in cancer      | 3                   | 0.0354               | CCR7,NR4A3,RUNX1T1                                                |
| 5150        | Staphylococcus aureus infection              | 2                   | 0.0361               | HLA-DQA2,HLA-DRA                                                  |
| 5134        | Legionellosis                                | 2                   | 0.038                | HSPA6,TNF                                                         |
| 5416        | Viral myocarditis                            | 2                   | 0.0399               | HLA-DQA2,HLA-DRA                                                  |
| 5210        | Colorectal cancer                            | 2                   | 0.0418               | FOS,JUN                                                           |

## Supplemental Table 2. KEGG Analysis, day 21

| #pathway ID | Pathway description                          | Observed gene count | False discovery rate | Matching proteins in your network                               |
|-------------|----------------------------------------------|---------------------|----------------------|-----------------------------------------------------------------|
| 4060        | Cytokine-cytokine receptor interaction       | 12                  | 1.83E-08             | CCL3,CRLF2,CSF2,IFNG,IL13,IL17RB,IL1A,IL3RA,IL4,IL5,OSM,TNFSF15 |
| 4630        | Jak-STAT signaling pathway                   | 8                   | 6.99E-06             | CRLF2,CSF2,IFNG,IL13,IL3RA,IL4,IL5,OSM                          |
| 4110        | Cell cycle                                   | 6                   | 0.000192             | CCNA1,CCNA2,CCNB1,CCNB2,CDC20,CDC45                             |
| 4664        | Fc epsilon RI signaling pathway              | 5                   | 0.000192             | CSF2,IL13,IL4,IL5,PLCG1                                         |
| 5321        | Inflammatory bowel disease (IBD)             | 5                   | 0.000192             | IFNG,IL13,IL1A,IL4,IL5                                          |
| 5330        | Allograft rejection                          | 4                   | 0.000244             | CD86,IFNG,IL4,IL5                                               |
| 4640        | Hematopoietic cell lineage                   | 5                   | 0.00036              | CSF2,IL1A,IL3RA,IL4,IL5                                         |
| 5323        | Rheumatoid arthritis                         | 5                   | 0.00036              | CCL3,CD86,CSF2,IFNG,IL1A                                        |
| 4660        | T cell receptor signaling pathway            | 5                   | 0.00064              | CSF2,IFNG,IL4,IL5,PLCG1                                         |
| 5162        | Measles                                      | 5                   | 0.00215              | IFNG,IL13,IL1A,IL4,TP73                                         |
| 5140        | Leishmaniasis                                | 4                   | 0.00227              | IFNG,IL1A,IL4,PTGS2                                             |
| 5310        | Asthma                                       | 3                   | 0.00271              | IL13,IL4,IL5                                                    |
| 4914        | Progesterone-mediated oocyte maturation      | 4                   | 0.00325              | CCNA1,CCNA2,CCNB1,CCNB2                                         |
| 5132        | Salmonella infection                         | 4                   | 0.00332              | CCL3,CSF2,IFNG,IL1A                                             |
| 5332        | Graft-versus-host disease                    | 3                   | 0.00463              | CD86,IFNG,IL1A                                                  |
| 5322        | Systemic lupus erythematosus                 | 4                   | 0.00516              | CD86,HIST1H2AJ,HIST1H2BM,IFNG                                   |
| 4940        | Type I diabetes mellitus                     | 3                   | 0.0056               | CD86,IFNG,IL1A                                                  |
| 4114        | Oocyte meiosis                               | 4                   | 0.00665              | CCNB1,CCNB2,CDC20,SGOL1                                         |
| 4672        | Intestinal immune network for IgA production | 3                   | 0.00665              | CD86,IL4,IL5                                                    |
| 5320        | Autoimmune thyroid disease                   | 3                   | 0.00869              | CD86,IL4,IL5                                                    |
| 4115        | p53 signaling pathway                        | 3                   | 0.0197               | CCNB1,CCNB2,TP73                                                |
| 5202        | Transcriptional misregulation in cancer      | 4                   | 0.03                 | CCNA1,CD86,CSF2,DUSP6                                           |
| 5203        | Viral carcinogenesis                         | 4                   | 0.0409               | CCNA1,CCNA2,CDC20,HIST1H2BM                                     |
| 5169        | Epstein-Barr virus infection                 | 4                   | 0.0457               | CCNA1,CCNA2,IFNG,PLCG1                                          |

Supplemental Table 3. Gene Ontogeny Analysis, day 14

| #pathway ID | Pathway description                                                                | Observed gene count | False discovery rate |
|-------------|------------------------------------------------------------------------------------|---------------------|----------------------|
| GO.0034097  | response to cytokine                                                               | 14                  | 8.87E-08             |
| GO.0051707  | response to other organism                                                         | 14                  | 8.87E-08             |
| GO.1903708  | positive regulation of hemopoiesis                                                 | 9                   | 9.32E-08             |
| GO.1902107  | positive regulation of leukocyte differentiation                                   | 8                   | 4.32E-07             |
| GO.0033993  | response to lipid                                                                  | 13                  | 3.61E-06             |
| GO.0032496  | response to lipopolysaccharide                                                     | 9                   | 5.37E-06             |
| GO.0002639  | positive regulation of immunoglobulin production                                   | 5                   | 5.66E-06             |
| GO.0006954  | inflammatory response                                                              | 10                  | 1.01E-05             |
| GO.0031347  | regulation of defense response                                                     | 12                  | 1.19E-05             |
| GO.0009617  | response to bacterium                                                              | 10                  | 1.44E-05             |
| GO.0045639  | positive regulation of myeloid cell differentiation                                | 6                   | 1.44E-05             |
| GO.0051239  | regulation of multicellular organismal process                                     | 19                  | 1.44E-05             |
| GO.0009893  | positive regulation of metabolic process                                           | 22                  | 3.44E-05             |
| GO.0042127  | regulation of cell proliferation                                                   | 15                  | 3.44E-05             |
| GO.0019221  | cytokine-mediated signaling pathway                                                | 9                   | 3.62E-05             |
| GO.0002763  | positive regulation of myeloid leukocyte differentiation                           | 5                   | 5.25E-05             |
| GO.0046636  | negative regulation of alpha-beta T cell activation                                | 4                   | 5.25E-05             |
| GO.0006955  | immune response                                                                    | 14                  | 5.39E-05             |
| GO.0045637  | regulation of myeloid cell differentiation                                         | 7                   | 5.79E-05             |
| GO.0002761  | regulation of myeloid leukocyte differentiation                                    | 6                   | 6.62E-05             |
| GO.0046634  | regulation of alpha-beta T cell activation                                         | 5                   | 7.88E-05             |
| GO.1903530  | regulation of secretion by cell                                                    | 10                  | 9.38E-05             |
| GO.1903706  | regulation of hemopoiesis                                                          | 8                   | 9.38E-05             |
| GO.0045622  | regulation of T-helper cell differentiation                                        | 4                   | 9.86E-05             |
| GO.0031325  | positive regulation of cellular metabolic process                                  | 19                  | 0.000115             |
| GO.0002376  | immune system process                                                              | 16                  | 0.000143             |
| GO.0071241  | cellular response to inorganic substance                                           | 6                   | 0.000143             |
| GO.0070887  | cellular response to chemical stimulus                                             | 17                  | 0.000156             |
| GO.1902105  | regulation of leukocyte differentiation                                            | 7                   | 0.000156             |
| GO.0002699  | positive regulation of immune effector process                                     | 6                   | 0.00017              |
| GO.0010534  | regulation of activation of JAK2 kinase activity                                   | 3                   | 0.000175             |
| GO.0010604  | positive regulation of macromolecule metabolic process                             | 18                  | 0.000185             |
| GO.0001817  | regulation of cytokine production                                                  | 9                   | 0.000211             |
| GO.0045623  | negative regulation of T-helper cell differentiation                               | 3                   | 0.000211             |
| GO.0050727  | regulation of inflammatory response                                                | 7                   | 0.000211             |
| GO.0051024  | positive regulation of immunoglobulin secretion                                    | 3                   | 0.000211             |
| GO.0061418  | regulation of transcription from RNA polymerase II promoter in response to hypoxia | 4                   | 0.000211             |
| GO.0071345  | cellular response to cytokine stimulus                                             | 9                   | 0.000211             |
| GO.0071310  | cellular response to organic substance                                             | 15                  | 0.000238             |
| GO.0009605  | response to external stimulus                                                      | 15                  | 0.00027              |
| GO.0048518  | positive regulation of biological process                                          | 24                  | 0.000333             |
| GO.0001774  | microglial cell activation                                                         | 3                   | 0.000354             |
| GO.0046425  | regulation of JAK-STAT cascade                                                     | 5                   | 0.000354             |
| GO.0010035  | response to inorganic substance                                                    | 8                   | 0.000384             |
| GO.0051716  | cellular response to stimulus                                                      | 26                  | 0.000384             |
| GO.0060341  | regulation of cellular localization                                                | 12                  | 0.000394             |
| GO.0051591  | response to cAMP                                                                   | 5                   | 0.000436             |
| GO.0071277  | cellular response to calcium ion                                                   | 4                   | 0.000481             |
| GO.0009612  | response to mechanical stimulus                                                    | 6                   | 0.000595             |
| GO.0051249  | regulation of lymphocyte activation                                                | 7                   | 0.000868             |
| GO.0071248  | cellular response to metal ion                                                     | 5                   | 0.000872             |
| GO.2000525  | positive regulation of T cell costimulation                                        | 2                   | 0.000875             |
| GO.0042510  | regulation of tyrosine phosphorylation of Stat1 protein                            | 3                   | 0.00095              |
| GO.0042110  | T cell activation                                                                  | 6                   | 0.000952             |
| GO.0051251  | positive regulation of lymphocyte activation                                       | 6                   | 0.000952             |
| GO.0032101  | regulation of response to external stimulus                                        | 10                  | 0.000968             |
| GO.0030888  | regulation of B cell proliferation                                                 | 4                   | 0.000981             |
| GO.0001819  | positive regulation of cytokine production                                         | 7                   | 0.00105              |
| GO.0051240  | positive regulation of multicellular organismal process                            | 12                  | 0.00105              |
| GO.0007165  | signal transduction                                                                | 22                  | 0.00106              |
| GO.0010557  | positive regulation of macromolecule biosynthetic process                          | 13                  | 0.00106              |
| GO.0043618  | regulation of transcription from RNA polymerase II promoter in response to stress  | 4                   | 0.00106              |
| GO.0050707  | regulation of cytokine secretion                                                   | 5                   | 0.00106              |
| GO.0045624  | positive regulation of T-helper cell differentiation                               | 3                   | 0.00113              |
| GO.0048584  | positive regulation of response to stimulus                                        | 14                  | 0.00113              |
| GO.0051090  | regulation of sequence-specific DNA binding transcription factor activity          | 7                   | 0.00113              |
| GO.0051704  | multi-organism process                                                             | 15                  | 0.00121              |

|            |                                                                                                    |    |         |
|------------|----------------------------------------------------------------------------------------------------|----|---------|
| GO.0032103 | positive regulation of response to external stimulus                                               | 7  | 0.00123 |
| GO.0050708 | regulation of protein secretion                                                                    | 7  | 0.0013  |
| GO.0006952 | defense response                                                                                   | 12 | 0.00132 |
| GO.0045935 | positive regulation of nucleobase-containing compound metabolic process                            | 13 | 0.00132 |
| GO.0002825 | regulation of T-helper 1 type immune response                                                      | 3  | 0.00134 |
| GO.0045893 | positive regulation of transcription, DNA-templated                                                | 12 | 0.00134 |
| GO.0048522 | positive regulation of cellular process                                                            | 21 | 0.00134 |
| GO.0080134 | regulation of response to stress                                                                   | 12 | 0.00134 |
| GO.0045582 | positive regulation of T cell differentiation                                                      | 4  | 0.00142 |
| GO.0046427 | positive regulation of JAK-STAT cascade                                                            | 4  | 0.00142 |
| GO.0045321 | leukocyte activation                                                                               | 7  | 0.00145 |
| GO.0001562 | response to protozoan                                                                              | 3  | 0.00147 |
| GO.0002697 | regulation of immune effector process                                                              | 7  | 0.00152 |
| GO.0031328 | positive regulation of cellular biosynthetic process                                               | 13 | 0.00157 |
| GO.0048534 | hematopoietic or lymphoid organ development                                                        | 8  | 0.00157 |
| GO.0045626 | negative regulation of T-helper 1 cell differentiation                                             | 2  | 0.00159 |
| GO.0048583 | regulation of response to stimulus                                                                 | 18 | 0.0017  |
| GO.0042104 | positive regulation of activated T cell proliferation                                              | 3  | 0.00175 |
| GO.0002520 | immune system development                                                                          | 8  | 0.00193 |
| GO.0007166 | cell surface receptor signaling pathway                                                            | 14 | 0.00193 |
| GO.0042493 | response to drug                                                                                   | 7  | 0.00193 |
| GO.0044700 | single organism signaling                                                                          | 22 | 0.00203 |
| GO.0014070 | response to organic cyclic compound                                                                | 9  | 0.00207 |
| GO.0008284 | positive regulation of cell proliferation                                                          | 9  | 0.00209 |
| GO.0042325 | regulation of phosphorylation                                                                      | 11 | 0.00216 |
| GO.0045597 | positive regulation of cell differentiation                                                        | 9  | 0.00216 |
| GO.0002521 | leukocyte differentiation                                                                          | 6  | 0.0022  |
| GO.0006950 | response to stress                                                                                 | 18 | 0.0022  |
| GO.0051246 | regulation of protein metabolic process                                                            | 15 | 0.00234 |
| GO.0002684 | positive regulation of immune system process                                                       | 9  | 0.00236 |
| GO.0050670 | regulation of lymphocyte proliferation                                                             | 5  | 0.0025  |
| GO.0032649 | regulation of interferon-gamma production                                                          | 4  | 0.00253 |
| GO.0048295 | positive regulation of isotype switching to IgE isotypes                                           | 2  | 0.00253 |
| GO.0048519 | negative regulation of biological process                                                          | 20 | 0.00253 |
| GO.1903532 | positive regulation of secretion by cell                                                           | 6  | 0.00253 |
| GO.2000416 | regulation of eosinophil migration                                                                 | 2  | 0.00253 |
| GO.0007154 | cell communication                                                                                 | 22 | 0.00254 |
| GO.0010033 | response to organic substance                                                                      | 15 | 0.00259 |
| GO.0010647 | positive regulation of cell communication                                                          | 12 | 0.0026  |
| GO.0002823 | negative regulation of adaptive immune response based on somatic recombination of immune receptors | 3  | 0.00274 |
| GO.0031399 | regulation of protein modification process                                                         | 12 | 0.00274 |
| GO.0032735 | positive regulation of interleukin-12 production                                                   | 3  | 0.00274 |
| GO.0043304 | regulation of mast cell degranulation                                                              | 3  | 0.00274 |
| GO.0050729 | positive regulation of inflammatory response                                                       | 4  | 0.00282 |
| GO.0002698 | negative regulation of immune effector process                                                     | 4  | 0.00305 |
| GO.0002682 | regulation of immune system process                                                                | 11 | 0.0032  |
| GO.0001892 | embryonic placenta development                                                                     | 4  | 0.00326 |
| GO.0051094 | positive regulation of developmental process                                                       | 10 | 0.00326 |
| GO.0033209 | tumor necrosis factor-mediated signaling pathway                                                   | 3  | 0.0035  |
| GO.0050728 | negative regulation of inflammatory response                                                       | 4  | 0.0035  |
| GO.0051247 | positive regulation of protein metabolic process                                                   | 11 | 0.00391 |
| GO.0030099 | myeloid cell differentiation                                                                       | 5  | 0.00399 |
| GO.0032268 | regulation of cellular protein metabolic process                                                   | 14 | 0.004   |
| GO.0050864 | regulation of B cell activation                                                                    | 4  | 0.00442 |
| GO.0006979 | response to oxidative stress                                                                       | 6  | 0.00463 |
| GO.0030890 | positive regulation of B cell proliferation                                                        | 3  | 0.00464 |
| GO.0032653 | regulation of interleukin-10 production                                                            | 3  | 0.00464 |
| GO.0030097 | hemopoiesis                                                                                        | 7  | 0.00474 |
| GO.0001932 | regulation of protein phosphorylation                                                              | 10 | 0.00483 |
| GO.0043382 | positive regulation of memory T cell differentiation                                               | 2  | 0.00483 |
| GO.0051133 | regulation of NK T cell activation                                                                 | 2  | 0.00483 |
| GO.2000319 | regulation of T-helper 17 cell differentiation                                                     | 2  | 0.00483 |
| GO.0050730 | regulation of peptidyl-tyrosine phosphorylation                                                    | 5  | 0.00484 |
| GO.0098542 | defense response to other organism                                                                 | 6  | 0.00492 |
| GO.0050671 | positive regulation of lymphocyte proliferation                                                    | 4  | 0.00493 |
| GO.0051049 | regulation of transport                                                                            | 12 | 0.005   |
| GO.0051223 | regulation of protein transport                                                                    | 8  | 0.00543 |
| GO.0050777 | negative regulation of immune response                                                             | 4  | 0.00559 |
| GO.0001816 | cytokine production                                                                                | 4  | 0.00609 |
| GO.0032870 | cellular response to hormone stimulus                                                              | 7  | 0.00613 |

|            |                                                                                               |    |         |
|------------|-----------------------------------------------------------------------------------------------|----|---------|
| GO.0031349 | positive regulation of defense response                                                       | 6  | 0.0062  |
| GO.0032722 | positive regulation of chemokine production                                                   | 3  | 0.00647 |
| GO.0071456 | cellular response to hypoxia                                                                  | 4  | 0.0065  |
| GO.0045944 | positive regulation of transcription from RNA polymerase II promoter                          | 9  | 0.00722 |
| GO.0030217 | T cell differentiation                                                                        | 4  | 0.00768 |
| GO.0043619 | regulation of transcription from RNA polymerase II promoter in response to oxidative stress   | 2  | 0.00776 |
| GO.0045630 | positive regulation of T-helper 2 cell differentiation                                        | 2  | 0.00776 |
| GO.2000113 | negative regulation of cellular macromolecule biosynthetic process                            | 10 | 0.00799 |
| GO.0050776 | regulation of immune response                                                                 | 8  | 0.00887 |
| GO.0048545 | response to steroid hormone                                                                   | 6  | 0.00889 |
| GO.0010646 | regulation of cell communication                                                              | 15 | 0.00901 |
| GO.0048585 | negative regulation of response to stimulus                                                   | 10 | 0.00952 |
| GO.0045934 | negative regulation of nucleobase-containing compound metabolic process                       | 10 | 0.00972 |
| GO.1901654 | response to ketone                                                                            | 4  | 0.00997 |
| GO.0046631 | alpha-beta T cell activation                                                                  | 3  | 0.0102  |
| GO.0010605 | negative regulation of macromolecule metabolic process                                        | 13 | 0.0104  |
| GO.0002703 | regulation of leukocyte mediated immunity                                                     | 4  | 0.0109  |
| GO.0031324 | negative regulation of cellular metabolic process                                             | 13 | 0.011   |
| GO.0032729 | positive regulation of interferon-gamma production                                            | 3  | 0.0111  |
| GO.0042531 | positive regulation of tyrosine phosphorylation of STAT protein                               | 3  | 0.0111  |
| GO.0032736 | positive regulation of interleukin-13 production                                              | 2  | 0.0113  |
| GO.0035914 | skeletal muscle cell differentiation                                                          | 3  | 0.0115  |
| GO.0048568 | embryonic organ development                                                                   | 6  | 0.0128  |
| GO.0001890 | placenta development                                                                          | 4  | 0.0131  |
| GO.0009628 | response to abiotic stimulus                                                                  | 9  | 0.0133  |
| GO.0045892 | negative regulation of transcription, DNA-templated                                           | 9  | 0.0142  |
| GO.0002824 | positive regulation of adaptive immune response based on somatic recombination of immune rece | 3  | 0.0151  |
| GO.0017157 | regulation of exocytosis                                                                      | 4  | 0.0151  |
| GO.0045670 | regulation of osteoclast differentiation                                                      | 3  | 0.0151  |
| GO.0030854 | positive regulation of granulocyte differentiation                                            | 2  | 0.0153  |
| GO.0050871 | positive regulation of B cell activation                                                      | 3  | 0.0154  |
| GO.0071496 | cellular response to external stimulus                                                        | 5  | 0.0154  |
| GO.0050731 | positive regulation of peptidyl-tyrosine phosphorylation                                      | 4  | 0.0155  |
| GO.0002708 | positive regulation of lymphocyte mediated immunity                                           | 3  | 0.016   |
| GO.0023056 | positive regulation of signaling                                                              | 10 | 0.0172  |
| GO.0009966 | regulation of signal transduction                                                             | 13 | 0.0187  |
| GO.0045595 | regulation of cell differentiation                                                            | 10 | 0.0196  |
| GO.0043306 | positive regulation of mast cell degranulation                                                | 2  | 0.0199  |
| GO.0045921 | positive regulation of exocytosis                                                             | 3  | 0.0202  |
| GO.0034162 | toll-like receptor 9 signaling pathway                                                        | 3  | 0.0224  |
| GO.0046649 | lymphocyte activation                                                                         | 5  | 0.0224  |
| GO.0048523 | negative regulation of cellular process                                                       | 17 | 0.0224  |
| GO.0071260 | cellular response to mechanical stimulus                                                      | 3  | 0.0224  |
| GO.0000302 | response to reactive oxygen species                                                           | 4  | 0.0225  |
| GO.0008630 | intrinsic apoptotic signaling pathway in response to DNA damage                               | 3  | 0.0232  |
| GO.0051241 | negative regulation of multicellular organismal process                                       | 8  | 0.0239  |
| GO.0071560 | cellular response to transforming growth factor beta stimulus                                 | 4  | 0.0243  |
| GO.0050714 | positive regulation of protein secretion                                                      | 4  | 0.0247  |
| GO.2000026 | regulation of multicellular organismal development                                            | 10 | 0.0254  |
| GO.0001829 | trophoblast cell differentiation                                                              | 2  | 0.0274  |
| GO.0002705 | positive regulation of leukocyte mediated immunity                                            | 3  | 0.0274  |
| GO.0042523 | positive regulation of tyrosine phosphorylation of Stat5 protein                              | 2  | 0.0274  |
| GO.0097190 | apoptotic signaling pathway                                                                   | 5  | 0.0274  |
| GO.1901741 | positive regulation of myoblast fusion                                                        | 2  | 0.0274  |
| GO.0043523 | regulation of neuron apoptotic process                                                        | 4  | 0.0282  |
| GO.0002755 | MyD88-dependent toll-like receptor signaling pathway                                          | 3  | 0.0299  |
| GO.0048145 | regulation of fibroblast proliferation                                                        | 3  | 0.0299  |
| GO.0033233 | regulation of protein sumoylation                                                             | 2  | 0.03    |
| GO.0042832 | defense response to protozoan                                                                 | 2  | 0.03    |
| GO.1902106 | negative regulation of leukocyte differentiation                                              | 3  | 0.0305  |
| GO.0032270 | positive regulation of cellular protein metabolic process                                     | 9  | 0.0318  |
| GO.0050778 | positive regulation of immune response                                                        | 6  | 0.0324  |
| GO.0009967 | positive regulation of signal transduction                                                    | 9  | 0.0325  |
| GO.0002076 | osteoblast development                                                                        | 2  | 0.0328  |
| GO.0035994 | response to muscle stretch                                                                    | 2  | 0.0328  |
| GO.0019222 | regulation of metabolic process                                                               | 22 | 0.036   |
| GO.0033554 | cellular response to stress                                                                   | 10 | 0.0374  |
| GO.0032660 | regulation of interleukin-17 production                                                       | 2  | 0.0392  |
| GO.0042326 | negative regulation of phosphorylation                                                        | 5  | 0.0398  |
| GO.0002293 | alpha-beta T cell differentiation involved in immune response                                 | 2  | 0.0421  |

|            |                                                                          |    |        |
|------------|--------------------------------------------------------------------------|----|--------|
| GO.0045672 | positive regulation of osteoclast differentiation                        | 2  | 0.0421 |
| GO.0071356 | cellular response to tumor necrosis factor                               | 3  | 0.0425 |
| GO.0002573 | myeloid leukocyte differentiation                                        | 3  | 0.0433 |
| GO.0006357 | regulation of transcription from RNA polymerase II promoter              | 10 | 0.0433 |
| GO.0007178 | transmembrane receptor protein serine/threonine kinase signaling pathway | 4  | 0.0433 |
| GO.0032733 | positive regulation of interleukin-10 production                         | 2  | 0.0444 |
| GO.0065009 | regulation of molecular function                                         | 13 | 0.0444 |
| GO.0071624 | positive regulation of granulocyte chemotaxis                            | 2  | 0.0444 |
| GO.0044708 | single-organism behavior                                                 | 5  | 0.0451 |
| GO.0031327 | negative regulation of cellular biosynthetic process                     | 9  | 0.0476 |
| GO.0034695 | response to prostaglandin E                                              | 2  | 0.0476 |
| GO.0043030 | regulation of macrophage activation                                      | 2  | 0.0476 |
| GO.0031323 | regulation of cellular metabolic process                                 | 20 | 0.0485 |

**Supplemental Table 3. Gene Ontogeny Analysis, day 21**

| <b>#pathway ID</b> | <b>Pathway description</b>                                       | <b>Observed gene count</b> | <b>False discovery rate</b> |
|--------------------|------------------------------------------------------------------|----------------------------|-----------------------------|
| GO.0000278         | mitotic cell cycle                                               | 67                         | 2.00E-34                    |
| GO.1903047         | mitotic cell cycle process                                       | 57                         | 1.46E-27                    |
| GO.0007049         | cell cycle                                                       | 72                         | 7.91E-27                    |
| GO.0022402         | cell cycle process                                               | 62                         | 1.12E-24                    |
| GO.0007067         | mitotic nuclear division                                         | 39                         | 6.56E-24                    |
| GO.0051301         | cell division                                                    | 42                         | 8.18E-22                    |
| GO.0000280         | nuclear division                                                 | 40                         | 1.50E-21                    |
| GO.0048285         | organelle fission                                                | 41                         | 1.50E-21                    |
| GO.0007059         | chromosome segregation                                           | 27                         | 1.62E-18                    |
| GO.0051726         | regulation of cell cycle                                         | 45                         | 2.17E-13                    |
| GO.0000070         | mitotic sister chromatid segregation                             | 16                         | 2.97E-13                    |
| GO.0010564         | regulation of cell cycle process                                 | 34                         | 3.07E-13                    |
| GO.0044772         | mitotic cell cycle phase transition                              | 27                         | 6.28E-13                    |
| GO.0098813         | nuclear chromosome segregation                                   | 18                         | 3.39E-12                    |
| GO.0006259         | DNA metabolic process                                            | 36                         | 1.81E-11                    |
| GO.0051983         | regulation of chromosome segregation                             | 14                         | 2.19E-11                    |
| GO.0006260         | DNA replication                                                  | 21                         | 2.64E-11                    |
| GO.0071103         | DNA conformation change                                          | 21                         | 5.04E-11                    |
| GO.0006996         | organelle organization                                           | 75                         | 1.07E-10                    |
| GO.1902589         | single-organism organelle organization                           | 60                         | 1.38E-10                    |
| GO.0000083         | regulation of transcription involved in G1/S transition of mitot | 10                         | 1.54E-10                    |
| GO.1901990         | regulation of mitotic cell cycle phase transition                | 21                         | 1.11E-09                    |
| GO.0051302         | regulation of cell division                                      | 21                         | 1.71E-09                    |
| GO.0006323         | DNA packaging                                                    | 17                         | 1.86E-09                    |
| GO.0051276         | chromosome organization                                          | 37                         | 1.86E-09                    |
| GO.0000075         | cell cycle checkpoint                                            | 19                         | 8.42E-09                    |
| GO.0007346         | regulation of mitotic cell cycle                                 | 26                         | 1.09E-08                    |
| GO.0000082         | G1/S transition of mitotic cell cycle                            | 17                         | 1.13E-08                    |
| GO.0006261         | DNA-dependent DNA replication                                    | 13                         | 1.13E-08                    |
| GO.0007264         | small GTPase mediated signal transduction                        | 31                         | 1.14E-08                    |
| GO.0051716         | cellular response to stimulus                                    | 111                        | 2.23E-08                    |
| GO.0035556         | intracellular signal transduction                                | 53                         | 2.27E-08                    |
| GO.0044763         | single-organism cellular process                                 | 156                        | 7.38E-08                    |
| GO.0007088         | regulation of mitotic nuclear division                           | 14                         | 8.91E-08                    |
| GO.0016043         | cellular component organization                                  | 94                         | 9.74E-08                    |
| GO.0051783         | regulation of nuclear division                                   | 15                         | 9.74E-08                    |
| GO.0045787         | positive regulation of cell cycle                                | 20                         | 2.15E-07                    |
| GO.0090068         | positive regulation of cell cycle process                        | 18                         | 2.40E-07                    |
| GO.0006270         | DNA replication initiation                                       | 8                          | 2.43E-07                    |
| GO.0045931         | positive regulation of mitotic cell cycle                        | 13                         | 2.62E-07                    |
| GO.0010948         | negative regulation of cell cycle process                        | 17                         | 8.17E-07                    |
| GO.0051781         | positive regulation of cell division                             | 13                         | 1.33E-06                    |
| GO.0006281         | DNA repair                                                       | 22                         | 1.35E-06                    |
| GO.0006334         | nucleosome assembly                                              | 12                         | 1.75E-06                    |
| GO.0065004         | protein-DNA complex assembly                                     | 13                         | 1.83E-06                    |
| GO.0051782         | negative regulation of cell division                             | 10                         | 3.24E-06                    |
| GO.1901992         | positive regulation of mitotic cell cycle phase transition       | 9                          | 3.61E-06                    |
| GO.0000727         | double-strand break repair via break-induced replication         | 4                          | 5.49E-06                    |
| GO.0031497         | chromatin assembly                                               | 12                         | 5.84E-06                    |



|            |                                                                  |     |          |
|------------|------------------------------------------------------------------|-----|----------|
| GO.0050789 | regulation of biological process                                 | 142 | 9.56E-06 |
| GO.0007052 | mitotic spindle organization                                     | 8   | 1.01E-05 |
| GO.0000910 | cytokinesis                                                      | 10  | 1.20E-05 |
| GO.0045786 | negative regulation of cell cycle                                | 21  | 1.36E-05 |
| GO.0002376 | immune system process                                            | 49  | 1.37E-05 |
| GO.0030071 | regulation of mitotic metaphase/anaphase transition              | 8   | 1.37E-05 |
| GO.0044699 | single-organism process                                          | 153 | 2.06E-05 |
| GO.0050794 | regulation of cellular process                                   | 137 | 2.06E-05 |
| GO.0006461 | protein complex assembly                                         | 31  | 2.45E-05 |
| GO.0070271 | protein complex biogenesis                                       | 31  | 2.45E-05 |
| GO.0000086 | G2/M transition of mitotic cell cycle                            | 12  | 2.76E-05 |
| GO.0022616 | DNA strand elongation                                            | 7   | 2.76E-05 |
| GO.0071822 | protein complex subunit organization                             | 39  | 2.98E-05 |
| GO.0006336 | DNA replication-independent nucleosome assembly                  | 8   | 4.24E-05 |
| GO.0034622 | cellular macromolecular complex assembly                         | 23  | 5.51E-05 |
| GO.0000226 | microtubule cytoskeleton organization                            | 17  | 5.66E-05 |
| GO.0042127 | regulation of cell proliferation                                 | 39  | 5.86E-05 |
| GO.1902850 | microtubule cytoskeleton organization involved in mitosis        | 6   | 5.86E-05 |
| GO.0001932 | regulation of protein phosphorylation                            | 34  | 6.07E-05 |
| GO.0006950 | response to stress                                               | 68  | 6.07E-05 |
| GO.0031577 | spindle checkpoint                                               | 7   | 6.57E-05 |
| GO.0051784 | negative regulation of nuclear division                          | 8   | 6.85E-05 |
| GO.0000076 | DNA replication checkpoint                                       | 5   | 7.56E-05 |
| GO.0006955 | immune response                                                  | 36  | 7.94E-05 |
| GO.0042325 | regulation of phosphorylation                                    | 35  | 9.93E-05 |
| GO.0007051 | spindle organization                                             | 9   | 0.000101 |
| GO.0010965 | regulation of mitotic sister chromatid separation                | 7   | 0.000101 |
| GO.0023052 | signaling                                                        | 87  | 0.000101 |
| GO.0034080 | CENP-A containing nucleosome assembly                            | 7   | 0.000101 |
| GO.0061641 | CENP-A containing chromatin organization                         | 7   | 0.000101 |
| GO.0051984 | positive regulation of chromosome segregation                    | 5   | 0.000103 |
| GO.0065007 | biological regulation                                            | 141 | 0.00012  |
| GO.0007017 | microtubule-based process                                        | 20  | 0.000122 |
| GO.0032434 | regulation of proteasomal ubiquitin-dependent protein catabolism | 11  | 0.000122 |
| GO.0045840 | positive regulation of mitotic nuclear division                  | 7   | 0.000128 |
| GO.1990267 | response to transition metal nanoparticle                        | 10  | 0.000128 |
| GO.0006974 | cellular response to DNA damage stimulus                         | 24  | 0.000153 |
| GO.0044700 | single organism signaling                                        | 86  | 0.000167 |
| GO.0048523 | negative regulation of cellular process                          | 73  | 0.000167 |
| GO.0051303 | establishment of chromosome localization                         | 7   | 0.000167 |
| GO.0007165 | signal transduction                                              | 82  | 0.000173 |
| GO.0048519 | negative regulation of biological process                        | 77  | 0.000173 |
| GO.0051128 | regulation of cellular component organization                    | 48  | 0.000201 |
| GO.0002274 | myeloid leukocyte activation                                     | 9   | 0.000204 |
| GO.0051246 | regulation of protein metabolic process                          | 52  | 0.000214 |
| GO.0042493 | response to drug                                                 | 18  | 0.000222 |
| GO.0010389 | regulation of G2/M transition of mitotic cell cycle              | 7   | 0.000242 |
| GO.0006271 | DNA strand elongation involved in DNA replication                | 6   | 0.000254 |
| GO.0000003 | reproduction                                                     | 28  | 0.000266 |
| GO.0045930 | negative regulation of mitotic cell cycle                        | 13  | 0.0003   |
| GO.0050896 | response to stimulus                                             | 108 | 0.000313 |
| GO.0065003 | macromolecular complex assembly                                  | 32  | 0.000313 |

|            |                                                                  |    |          |
|------------|------------------------------------------------------------------|----|----------|
| GO.1901991 | negative regulation of mitotic cell cycle phase transition       | 11 | 0.000356 |
| GO.0006310 | DNA recombination                                                | 12 | 0.000358 |
| GO.0034097 | response to cytokine                                             | 22 | 0.000358 |
| GO.0007154 | cell communication                                               | 86 | 0.000361 |
| GO.0090307 | mitotic spindle assembly                                         | 5  | 0.000374 |
| GO.0060326 | cell chemotaxis                                                  | 11 | 0.000388 |
| GO.0061640 | cytoskeleton-dependent cytokinesis                               | 6  | 0.000395 |
| GO.0009636 | response to toxic substance                                      | 11 | 0.000406 |
| GO.0006302 | double-strand break repair                                       | 10 | 0.000492 |
| GO.0007093 | mitotic cell cycle checkpoint                                    | 11 | 0.000501 |
| GO.0016477 | cell migration                                                   | 24 | 0.000501 |
| GO.0097305 | response to alcohol                                              | 15 | 0.000501 |
| GO.0051985 | negative regulation of chromosome segregation                    | 6  | 0.00053  |
| GO.0008285 | negative regulation of cell proliferation                        | 22 | 0.00055  |
| GO.0031399 | regulation of protein modification process                       | 38 | 0.00055  |
| GO.0034341 | response to interferon-gamma                                     | 9  | 0.00055  |
| GO.0033044 | regulation of chromosome organization                            | 12 | 0.000574 |
| GO.0002449 | lymphocyte mediated immunity                                     | 9  | 0.000578 |
| GO.0007010 | cytoskeleton organization                                        | 25 | 0.000581 |
| GO.0006952 | defense response                                                 | 35 | 0.000592 |
| GO.0031145 | anaphase-promoting complex-dependent proteasomal ubiqui          | 8  | 0.000607 |
| GO.0051988 | regulation of attachment of spindle microtubules to kinetocho    | 4  | 0.000628 |
| GO.1903050 | regulation of proteolysis involved in cellular protein catabolic | 14 | 0.00072  |
| GO.0051338 | regulation of transferase activity                               | 26 | 0.000758 |
| GO.0002443 | leukocyte mediated immunity                                      | 10 | 0.000829 |
| GO.0051297 | centrosome organization                                          | 7  | 0.000829 |
| GO.0007076 | mitotic chromosome condensation                                  | 4  | 0.000901 |
| GO.0019220 | regulation of phosphate metabolic process                        | 36 | 0.000987 |
| GO.0030261 | chromosome condensation                                          | 5  | 0.001    |
| GO.0032465 | regulation of cytokinesis                                        | 7  | 0.001    |
| GO.0006928 | movement of cell or subcellular component                        | 33 | 0.00101  |
| GO.0009411 | response to UV                                                   | 9  | 0.00101  |
| GO.0051321 | meiotic cell cycle                                               | 10 | 0.00114  |
| GO.0008608 | attachment of spindle microtubules to kinetochore                | 4  | 0.00119  |
| GO.0031570 | DNA integrity checkpoint                                         | 10 | 0.00119  |
| GO.0046427 | positive regulation of JAK-STAT cascade                          | 7  | 0.00119  |
| GO.0061136 | regulation of proteasomal protein catabolic process              | 12 | 0.00119  |
| GO.0032268 | regulation of cellular protein metabolic process                 | 47 | 0.00131  |
| GO.0000281 | mitotic cytokinesis                                              | 5  | 0.00138  |
| GO.0010165 | response to X-ray                                                | 5  | 0.00138  |
| GO.0050731 | positive regulation of peptidyl-tyrosine phosphorylation         | 10 | 0.00143  |
| GO.0030162 | regulation of proteolysis                                        | 23 | 0.00146  |
| GO.0034508 | centromere complex assembly                                      | 6  | 0.00153  |
| GO.0045839 | negative regulation of mitotic nuclear division                  | 6  | 0.00153  |
| GO.0007096 | regulation of exit from mitosis                                  | 4  | 0.00155  |
| GO.0043306 | positive regulation of mast cell degranulation                   | 4  | 0.00155  |
| GO.0051674 | localization of cell                                             | 24 | 0.00159  |
| GO.0032776 | DNA methylation on cytosine                                      | 5  | 0.00187  |
| GO.0040011 | locomotion                                                       | 30 | 0.00194  |
| GO.1902531 | regulation of intracellular signal transduction                  | 33 | 0.00217  |
| GO.0000724 | double-strand break repair via homologous recombination          | 7  | 0.00226  |
| GO.0010212 | response to ionizing radiation                                   | 9  | 0.00232  |

|            |                                                                   |    |         |
|------------|-------------------------------------------------------------------|----|---------|
| GO.1903557 | positive regulation of tumor necrosis factor superfamily cytok    | 6  | 0.00233 |
| GO.0051247 | positive regulation of protein metabolic process                  | 33 | 0.00237 |
| GO.0006954 | inflammatory response                                             | 16 | 0.00252 |
| GO.0042176 | regulation of protein catabolic process                           | 16 | 0.00252 |
| GO.0031536 | positive regulation of exit from mitosis                          | 3  | 0.00254 |
| GO.0022607 | cellular component assembly                                       | 39 | 0.00261 |
| GO.0002252 | immune effector process                                           | 16 | 0.00278 |
| GO.0031572 | G2 DNA damage checkpoint                                          | 5  | 0.00281 |
| GO.0034502 | protein localization to chromosome                                | 5  | 0.00281 |
| GO.0001934 | positive regulation of protein phosphorylation                    | 23 | 0.00285 |
| GO.0033043 | regulation of organelle organization                              | 28 | 0.00296 |
| GO.0042531 | positive regulation of tyrosine phosphorylation of STAT protei    | 6  | 0.00304 |
| GO.0007094 | mitotic spindle assembly checkpoint                               | 5  | 0.00322 |
| GO.0032270 | positive regulation of cellular protein metabolic process         | 31 | 0.00346 |
| GO.0033554 | cellular response to stress                                       | 36 | 0.0038  |
| GO.0043933 | macromolecular complex subunit organization                       | 43 | 0.00389 |
| GO.0044818 | mitotic G2/M transition checkpoint                                | 4  | 0.00389 |
| GO.0032467 | positive regulation of cytokinesis                                | 5  | 0.00404 |
| GO.0032435 | negative regulation of proteasomal ubiquitin-dependent prote      | 6  | 0.00429 |
| GO.0051310 | metaphase plate congression                                       | 5  | 0.00458 |
| GO.0070507 | regulation of microtubule cytoskeleton organization               | 8  | 0.00466 |
| GO.0051129 | negative regulation of cellular component organization            | 18 | 0.00486 |
| GO.0000079 | regulation of cyclin-dependent protein serine/threonine kinas     | 7  | 0.00574 |
| GO.0000183 | chromatin silencing at rDNA                                       | 5  | 0.00574 |
| GO.0002366 | leukocyte activation involved in immune response                  | 8  | 0.00574 |
| GO.0006275 | regulation of DNA replication                                     | 8  | 0.00574 |
| GO.0060968 | regulation of gene silencing                                      | 5  | 0.00574 |
| GO.0043549 | regulation of kinase activity                                     | 21 | 0.00584 |
| GO.0045080 | positive regulation of chemokine biosynthetic process             | 3  | 0.00585 |
| GO.0051488 | activation of anaphase-promoting complex activity                 | 3  | 0.00585 |
| GO.0071346 | cellular response to interferon-gamma                             | 7  | 0.00597 |
| GO.0045732 | positive regulation of protein catabolic process                  | 11 | 0.00634 |
| GO.1903052 | positive regulation of proteolysis involved in cellular protein c | 9  | 0.00649 |
| GO.0051439 | regulation of ubiquitin-protein ligase activity involved in mitot | 7  | 0.00673 |
| GO.0051656 | establishment of organelle localization                           | 12 | 0.00673 |
| GO.0060333 | interferon-gamma-mediated signaling pathway                       | 6  | 0.0068  |
| GO.0031401 | positive regulation of protein modification process               | 26 | 0.00683 |
| GO.0071345 | cellular response to cytokine stimulus                            | 17 | 0.00688 |
| GO.0010035 | response to inorganic substance                                   | 15 | 0.00697 |
| GO.0051052 | regulation of DNA metabolic process                               | 12 | 0.0073  |
| GO.0010639 | negative regulation of organelle organization                     | 12 | 0.00799 |
| GO.0019221 | cytokine-mediated signaling pathway                               | 14 | 0.00802 |
| GO.0045842 | positive regulation of mitotic metaphase/anaphase transition      | 3  | 0.00802 |
| GO.0045087 | innate immune response                                            | 24 | 0.00814 |
| GO.0042981 | regulation of apoptotic process                                   | 31 | 0.0082  |
| GO.1903660 | negative regulation of complement-dependent cytotoxicity          | 2  | 0.00821 |
| GO.0030593 | neutrophil chemotaxis                                             | 5  | 0.00828 |
| GO.0060341 | regulation of cellular localization                               | 28 | 0.00851 |
| GO.1902533 | positive regulation of intracellular signal transduction          | 22 | 0.00851 |
| GO.0080090 | regulation of primary metabolic process                           | 83 | 0.00996 |
| GO.0010941 | regulation of cell death                                          | 32 | 0.0111  |
| GO.0002228 | natural killer cell mediated immunity                             | 4  | 0.0115  |

|            |                                                                 |    |        |
|------------|-----------------------------------------------------------------|----|--------|
| GO.0033260 | nuclear DNA replication                                         | 4  | 0.0115 |
| GO.0045937 | positive regulation of phosphate metabolic process              | 24 | 0.0115 |
| GO.0044085 | cellular component biogenesis                                   | 39 | 0.0121 |
| GO.0033993 | response to lipid                                               | 21 | 0.0122 |
| GO.0051640 | organelle localization                                          | 13 | 0.0122 |
| GO.0065008 | regulation of biological quality                                | 53 | 0.0124 |
| GO.1904029 | regulation of cyclin-dependent protein kinase activity          | 8  | 0.0133 |
| GO.0045862 | positive regulation of proteolysis                              | 13 | 0.0135 |
| GO.0001774 | microglial cell activation                                      | 3  | 0.0137 |
| GO.0071168 | protein localization to chromatin                               | 3  | 0.0137 |
| GO.0009314 | response to radiation                                           | 15 | 0.014  |
| GO.0032880 | regulation of protein localization                              | 23 | 0.014  |
| GO.0014070 | response to organic cyclic compound                             | 21 | 0.0141 |
| GO.0032760 | positive regulation of tumor necrosis factor production         | 5  | 0.0141 |
| GO.0045428 | regulation of nitric oxide biosynthetic process                 | 5  | 0.0141 |
| GO.0008284 | positive regulation of cell proliferation                       | 21 | 0.0146 |
| GO.0042116 | macrophage activation                                           | 4  | 0.0146 |
| GO.0046688 | response to copper ion                                          | 4  | 0.0146 |
| GO.0045859 | regulation of protein kinase activity                           | 19 | 0.0147 |
| GO.0040008 | regulation of growth                                            | 18 | 0.0152 |
| GO.0042060 | wound healing                                                   | 19 | 0.0155 |
| GO.0051179 | localization                                                    | 69 | 0.0158 |
| GO.0010332 | response to gamma radiation                                     | 5  | 0.0164 |
| GO.0001701 | in utero embryonic development                                  | 13 | 0.0176 |
| GO.0002639 | positive regulation of immunoglobulin production                | 4  | 0.0186 |
| GO.0007080 | mitotic metaphase plate congression                             | 4  | 0.0186 |
| GO.0009605 | response to external stimulus                                   | 37 | 0.0186 |
| GO.0048660 | regulation of smooth muscle cell proliferation                  | 6  | 0.0199 |
| GO.0007275 | multicellular organismal development                            | 66 | 0.0202 |
| GO.0034421 | post-translational protein acetylation                          | 2  | 0.0202 |
| GO.1902947 | regulation of tau-protein kinase activity                       | 2  | 0.0202 |
| GO.1902969 | mitotic DNA replication                                         | 2  | 0.0202 |
| GO.1902996 | regulation of neurofibrillary tangle assembly                   | 2  | 0.0202 |
| GO.0007596 | blood coagulation                                               | 16 | 0.0215 |
| GO.0050900 | leukocyte migration                                             | 10 | 0.0222 |
| GO.1901214 | regulation of neuron death                                      | 10 | 0.0222 |
| GO.0045471 | response to ethanol                                             | 7  | 0.023  |
| GO.0002286 | T cell activation involved in immune response                   | 5  | 0.0238 |
| GO.0001833 | inner cell mass cell proliferation                              | 3  | 0.0257 |
| GO.0006978 | DNA damage response, signal transduction by p53 class medi      | 3  | 0.0257 |
| GO.0032642 | regulation of chemokine production                              | 5  | 0.0257 |
| GO.0002700 | regulation of production of molecular mediator of immune re:    | 6  | 0.0258 |
| GO.2000060 | positive regulation of protein ubiquitination involved in ubiqu | 6  | 0.0258 |
| GO.0010038 | response to metal ion                                           | 11 | 0.0261 |
| GO.0045321 | leukocyte activation                                            | 13 | 0.0263 |
| GO.0002285 | lymphocyte activation involved in immune response               | 6  | 0.027  |
| GO.0002702 | positive regulation of production of molecular mediator of imi  | 5  | 0.027  |
| GO.0006968 | cellular defense response                                       | 5  | 0.027  |
| GO.0043065 | positive regulation of apoptotic process                        | 16 | 0.027  |
| GO.0050729 | positive regulation of inflammatory response                    | 6  | 0.027  |
| GO.0070887 | cellular response to chemical stimulus                          | 42 | 0.027  |
| GO.1902532 | negative regulation of intracellular signal transduction        | 13 | 0.027  |

|            |                                                                 |     |        |
|------------|-----------------------------------------------------------------|-----|--------|
| GO.0090329 | regulation of DNA-dependent DNA replication                     | 4   | 0.0277 |
| GO.1902229 | regulation of intrinsic apoptotic signaling pathway in response | 4   | 0.0277 |
| GO.0010605 | negative regulation of macromolecule metabolic process          | 41  | 0.0284 |
| GO.0032501 | multicellular organismal process                                | 84  | 0.0284 |
| GO.0051707 | response to other organism                                      | 18  | 0.0284 |
| GO.1903827 | regulation of cellular protein localization                     | 15  | 0.0285 |
| GO.1903532 | positive regulation of secretion by cell                        | 11  | 0.0286 |
| GO.0009991 | response to extracellular stimulus                              | 14  | 0.0299 |
| GO.0044702 | single organism reproductive process                            | 24  | 0.0313 |
| GO.0006468 | protein phosphorylation                                         | 20  | 0.0314 |
| GO.0031324 | negative regulation of cellular metabolic process               | 41  | 0.0321 |
| GO.2001252 | positive regulation of chromosome organization                  | 6   | 0.0324 |
| GO.0044707 | single-multicellular organism process                           | 81  | 0.0327 |
| GO.0045429 | positive regulation of nitric oxide biosynthetic process        | 4   | 0.0329 |
| GO.0051340 | regulation of ligase activity                                   | 7   | 0.0335 |
| GO.0001819 | positive regulation of cytokine production                      | 12  | 0.0343 |
| GO.0043146 | spindle stabilization                                           | 2   | 0.0343 |
| GO.0006935 | chemotaxis                                                      | 17  | 0.0344 |
| GO.0007141 | male meiosis I                                                  | 3   | 0.0344 |
| GO.0042510 | regulation of tyrosine phosphorylation of Stat1 protein         | 3   | 0.0344 |
| GO.2001251 | negative regulation of chromosome organization                  | 6   | 0.0348 |
| GO.0009987 | cellular process                                                | 155 | 0.035  |
| GO.0045143 | homologous chromosome segregation                               | 4   | 0.0355 |
| GO.1901216 | positive regulation of neuron death                             | 5   | 0.0356 |
| GO.0031323 | regulation of cellular metabolic process                        | 82  | 0.0381 |
| GO.0032570 | response to progesterone                                        | 4   | 0.0386 |
| GO.0060255 | regulation of macromolecule metabolic process                   | 79  | 0.0391 |
| GO.1903036 | positive regulation of response to wounding                     | 7   | 0.0398 |
| GO.0009607 | response to biotic stimulus                                     | 18  | 0.041  |
| GO.0051054 | positive regulation of DNA metabolic process                    | 7   | 0.0414 |
| GO.0010498 | proteasomal protein catabolic process                           | 11  | 0.0427 |
| GO.0007127 | meiosis I                                                       | 5   | 0.0428 |
| GO.0071241 | cellular response to inorganic substance                        | 7   | 0.0428 |
| GO.2001020 | regulation of response to DNA damage stimulus                   | 7   | 0.0428 |
| GO.0031667 | response to nutrient levels                                     | 13  | 0.0436 |
| GO.0051704 | multi-organism process                                          | 40  | 0.0436 |
| GO.0001556 | oocyte maturation                                               | 3   | 0.0459 |
| GO.0042832 | defense response to protozoan                                   | 3   | 0.0459 |
| GO.0009967 | positive regulation of signal transduction                      | 27  | 0.05   |
| GO.0018105 | peptidyl-serine phosphorylation                                 | 6   | 0.05   |
| GO.0043066 | negative regulation of apoptotic process                        | 20  | 0.05   |
