# Supplementary material
Source: PubMed Central journal article supplement (PMC6037129)
Supplement: mmc2.pdf [file mmc2.pdf]

# Dominant-Negative TGF- $\beta$ Receptor Enhances PSMA-Targeted Human CAR T Cell Proliferation And Augments Prostate Cancer Eradication

Christopher C. Kloss,<sup>1,4</sup> Jihyun Lee,<sup>1,5</sup> Aaron Zhang,<sup>1</sup> Fang Chen,<sup>1</sup> Jan Joseph Melenhorst,<sup>1,2,3</sup> Simon F. Lacey,<sup>1</sup> Marcela V. Maus,<sup>1,6</sup> Joseph A. Fraietta,<sup>1,2,3</sup> Yangbing Zhao,<sup>1,2</sup> and Carl H. June<sup>1,2,3,4</sup>

<sup>1</sup>Center for Cellular Immunotherapies, Perelman School of Medicine, University of Pennsylvania, Philadelphia, PA 19104-5156, USA; <sup>2</sup>Department of Pathology and Laboratory Medicine, Perelman School of Medicine, University of Pennsylvania, Philadelphia, PA 19104-5156, USA; <sup>3</sup>Parker Institute for Cancer at the University of Pennsylvania, Philadelphia, PA 19104-5156, USA; <sup>4</sup>Smilow Center for Translational Research, 3400 Civic Center Blvd., Philadelphia, PA 19104-5156, USA

**Cancer has an impressive ability to evade therapies. While immunotherapies and vaccines have shown great promise, particularly in certain solid tumors such as prostate cancer, they have been met with resistance from tumors that use a multitude of mechanisms of immunosuppression to limit effectiveness. Prostate cancer, in particular, secretes transforming growth factor  $\beta$  (TGF- $\beta$ ) as a means to inhibit immunity while allowing for cancer progression. Blocking TGF- $\beta$  signaling in T cells increases their ability to infiltrate, proliferate, and mediate antitumor responses in prostate cancer models. We tested whether the potency of chimeric antigen receptor (CAR) T cells directed to prostate-specific membrane antigen (PSMA) could be enhanced by the co-expression of a dominant-negative TGF- $\beta$ R2 (dnTGF- $\beta$ R2). Upon expression of the dominant-negative TGF- $\beta$ R2 in CAR T cells, we observed increased proliferation of these lymphocytes, enhanced cytokine secretion, resistance to exhaustion, long-term *in vivo* persistence, and the induction of tumor eradication in aggressive human prostate cancer mouse models. Based on our observations, we initiated a phase I clinical trial to assess these CAR T cells as a novel approach for patients with relapsed and refractory metastatic prostate cancer (ClinicalTrials.gov: NCT03089203).**

## INTRODUCTION

Prostate cancer is the most common and second most deadly cancer for men. Upon metastasis to bone, the disease usually becomes refractory to therapy and often results in death within 3–5 years.<sup>1</sup> Metastatic prostate cancer is minimally responsive to checkpoint blockade of PD-1 and CTLA-4.<sup>2</sup>

The recent medical breakthroughs of cancer immunotherapy have demonstrated the power that harnessing the immune system can have to eliminate cancer cells.<sup>3</sup> Most of these therapies rely on the triggering of immune responses upon administering monoclonal antibodies that block various immunosuppressive signals.<sup>4,5</sup> However, relying on endogenous responses makes it difficult to achieve high therapeutic efficacy while avoiding toxic autoimmune side effects.<sup>6</sup>

For more precise therapy, T cells can be engineered with chimeric antigen receptor (CAR) constructs to recognize and exert cytotoxic effects on cells expressing specific antigens.<sup>7,8</sup> A challenge to the success of these therapies is the immunosuppressive microenvironment that re-directed T cells encounter upon infiltration into the tumor bed.<sup>9,10</sup>

To achieve therapeutic success within solid tumors, CAR T cells need to overcome immunosuppressive signals. One approach is to block immunosuppressive pathways such as PD-1 and/or CTLA-4 in combination with CAR T cells to achieve an enhanced response.<sup>11,12</sup> Many cancers, particularly prostate cancer, are known to secrete transforming growth factor  $\beta$  (TGF- $\beta$ ), creating an immunosuppressive milieu. TGF- $\beta$  is known to induce or promote metastasis and neoangiogenesis and to potently suppress the immune system.<sup>13–15</sup> Studies in the 1990s demonstrated that TGF- $\beta$  signaling can be blocked by using a dominant-negative TGF $\beta$ R2 (dnTGF- $\beta$ R2), which is truncated and lacks the intracellular domain necessary for downstream signaling.<sup>16,17</sup> Expression of the dnTGF- $\beta$ R2 enhances antitumor immunity and can lead to autoimmunity.<sup>18,19</sup> Furthermore, transgenic mice expressing dnTGF- $\beta$ R2 develop a lymphoproliferative disorder.<sup>20</sup> Two studies demonstrated enhanced T cell infiltration into tumors with potent antitumor responses in the transgenic adenocarcinoma mouse prostate (TRAMP) mouse model of prostate cancer when utilizing this receptor.<sup>21,22</sup> A clinical trial (ClinicalTrials.gov: NCT00368082) testing the safety and efficacy of the dnTGF- $\beta$ R2 receptor in Epstein-Barr virus (EBV)-specific T cells for lymphoma was recently reported.<sup>23,24</sup>

Received 13 January 2018; accepted 4 May 2018;  
<https://doi.org/10.1016/j.ymthe.2018.05.003>.

<sup>5</sup>Present address: LG Chem, Ltd., Seoul, South Korea

<sup>6</sup>Present address: Massachusetts General Hospital, Boston, MA 02114, USA

**Correspondence:** Christopher C. Kloss, Smilow Center for Translational Research, 3400 Civic Center Blvd., Philadelphia, PA 19104-5156, USA.  
**E-mail:** [klosschr@pennmedicine.upenn.edu](mailto:klosschr@pennmedicine.upenn.edu)

**Correspondence:** Carl H. June, Smilow Center for Translational Research, 3400 Civic Center Blvd., Philadelphia, PA 19104-5156, USA.  
**E-mail:** [cjune@upenn.edu](mailto:cjune@upenn.edu)

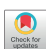

Glutamate carboxypeptidase II or prostate-specific membrane antigen (PSMA) is a type II membrane glycoprotein that has been studied within the prostate cancer field for three decades as a tumor-associated antigen for prostate cancer. There is low-level expression in some normal tissues (e.g., astrocytes, neurons, kidney epithelium, and salivary gland). Many methodologies use PSMA either for positron emission tomography (PET) imaging or for antibody-targeted therapies.<sup>25</sup> In addition, a trial has been open since 2010 using anti-PSMA CAR T cells employing a CD28 costimulatory and CD3 $\zeta$  activation domain with reported limited persistence of the CAR T cells and no observed responses (ClinicalTrials.gov: NCT01140373), indicating a need for a more potent PSMA-specific CAR T cell.

We reasoned that co-expressing the dnTGF- $\beta$ RII with a PSMA-specific CAR in T cells would result in enhanced infiltration, proliferation, persistence, and efficacy when treating prostate cancer. We characterized the mechanisms underlying the potency-enhancing effects of TGF- $\beta$  blockade in anti-PSMA Pbbz CAR T cells.

## RESULTS

The design of the CARs used in these studies is described in the [Materials and Methods](#). All CARs used the 4-1BB costimulatory and CD3 $\zeta$ -signaling domains that are in tisagenlecleucel, the CAR recently approved by the U.S. Food and Drug Administration for leukemia. Employing lentiviral vectors, we routinely obtain 30%–60% transduction efficiencies of primary human T cells using an MOI of 1 to 2. Mock-transduced cells were included to control for allogeneic effects. A mismatched CAR was included that targets CD19 (tisagenlecleucel, 19BBZ) to control for antigen-independent effects of the CAR components. In the case of the anti-PSMA CAR (Pbbz), the scFv was derived from the mouse J591 monoclonal antibody that had been previously humanized.<sup>26</sup>

Utilizing a T2A element, we obtained efficient co-expression of the dnTGF- $\beta$ RII with the Pbbz CAR (dnTGF- $\beta$ RII-T2A-Pbbz ([Figure 1A](#)). This dnTGF- $\beta$ RII functions to block TGF- $\beta$  signaling, which was demonstrated by differential SMAD2/3 phosphorylation in CAR-positive and CAR-negative cells upon stimulation with human TGF- $\beta$  ([Figure 1B](#)). The Pbbz CAR functioned to induce specific lysis of human prostate cancer cells only when they expressed PSMA ([Figure 1C](#)). The PC3 prostate cancer cell line was verified to secrete high levels of latent TGF- $\beta$  ([Figure 1D](#)). When these PC3-PSMA<sup>+</sup> tumor cells were used for long-term co-culture experiments with Pbbz CAR T cells, the CAR T cells co-expressing the dnTGF- $\beta$ RII had a much higher population doubling observed, with ~15-fold higher proliferation over 42 days co-culture and repetitive stimulation with PSMA-expressing tumor cells ([Figure 1E](#)). This enhanced proliferation was antigen dependent, because it was not observed in cultures of CAR T cells with or without tumor cells that did not express PSMA ([Figure 1E](#), top panels).

Intrigued by the ability of dnTGF- $\beta$ RII-T2A-Pbbz CAR T cells to proliferate more efficiently than Pbbz alone in the presence of tumor cells that secrete TGF- $\beta$ , we next interrogated these *in vitro* co-cul-

tures more closely. At days 0, 7, 14, 21, and 28, we harvested the T cells and supernatant for analyses. The CD8<sup>+</sup> T cell percentage declined from the routinely obtained 30% at baseline to 7.8% in Pbbz and 5.0% in dnTGF- $\beta$ RII-T2A-Pbbz by day 28. There was a modest increase from 1.56% to 3.55% of CD4<sup>+</sup> CAR T cells that expressed CD127. We found that there was a statistically higher percentage of central memory CD8<sup>+</sup> T cells with a significant loss of FoxP3 staining from 38% in Pbbz to 25% in dnTGF- $\beta$ RII-T2A-Pbbz ([Figures 2A](#) and [2B](#)). From cytokine analysis, we determined that T<sub>H</sub>2 cytokines (i.e., interleukin-4 [IL-4], IL-5, and IL-13) were differentially secreted at higher amounts in dnTGF- $\beta$ RII-T2A-Pbbz than in Pbbz ([Figure 2C](#)). IL-2 secretion by the PSMA Pbbz CAR T cells was similar with or without dnTGF- $\beta$ RII. In addition, the innate immune cell-recruiting cytokines IP-10, MIP1- $\alpha$ , MIP1- $\beta$ , and RANTES were elevated in the dnTGF- $\beta$ RII-T2A-Pbbz group compared to the Pbbz group.

By harvesting total mRNA from these T cells at spaced time intervals after the initiation of culture, we performed longitudinal whole-transcriptome and microRNA microarray analysis. Interestingly, at 7 days of co-culture with PC3-PSMA, these dnTGF- $\beta$ RII-T2A-Pbbz T cells only had 16 differentially expressed (>2- or <-2-fold change) genes or microRNAs ([Table S1](#)). Most of these were either unannotated genes or microRNAs. After 14 days, there were 51 differentially expressed genes or microRNAs. Finally, after 21 days there were 343 differentially expressed genes or microRNAs. Confirmed by cytokine analysis, IL-4, IL-5, and IL-13 were among the highest differentially expressed genes (DEGs) in the dnTGF- $\beta$ RII-T2A-Pbbz group. Other highly DEGs of interest included EOMES, IFNG, PTGDR2, EPAS1, EGR1, and ARG2 ([Figure S1](#); [Table S1](#)).

A protein-protein interaction (PPI) network was constructed using the DEGs on days 14 and 21 of co-culture with the PC3-PSMA tumor cells ([Figure 3](#)). The PPI was constructed using STRING.<sup>27</sup> On day 14, the analysis shown in [Figure 3A](#) indicates that more inter-protein interactions were found than expected by random interaction ( $p < 1.3 \times 10^{-14}$ ). There were 3 clusters of proteins preferentially interacting in dnTGF- $\beta$ RII-T2A-Pbbz PSMA CAR T cells on day 14. One cluster comprised cytokine-related proteins (IL-4, IL-5, SOCS1, IL-23R, PTGDR2, TLR7, etc.), another comprised transcription factors (FOS, FOSL2, EGR1, JUN, JUNB, and JUND), and the last, hypoxia-related factors (ARNT, EGLN3, and EPAS1). In contrast, on day 21 there were 2 main clusters of predicted functional or structural PPIs ([Figure 3B](#)): one comprised cell cycle-related proteins (CCNA1, CCNA2, CCNB1, CCNB2, CDK1, CDC20, CDC20B, CDC45, CKS, CKS1B, and TP73), and the other, cytokines and chemokines (leukemia inhibitory factor [LIF], interferon [IFN]- $\gamma$ , IL-1A, IL-3RA, IL-4, IL-5, colony-stimulating factor 2 [CSF2], oncostatin M [OSM], IL-13, and CCL3).

The DEGs were then mapped to the Kyoto Encyclopedia of Genes and Genomes (KEGG) pathways, and their enrichment for specific pathways was investigated using STRING analysis. On day 21, there were 24 KEGG pathways identified, including cell signaling (cytokine

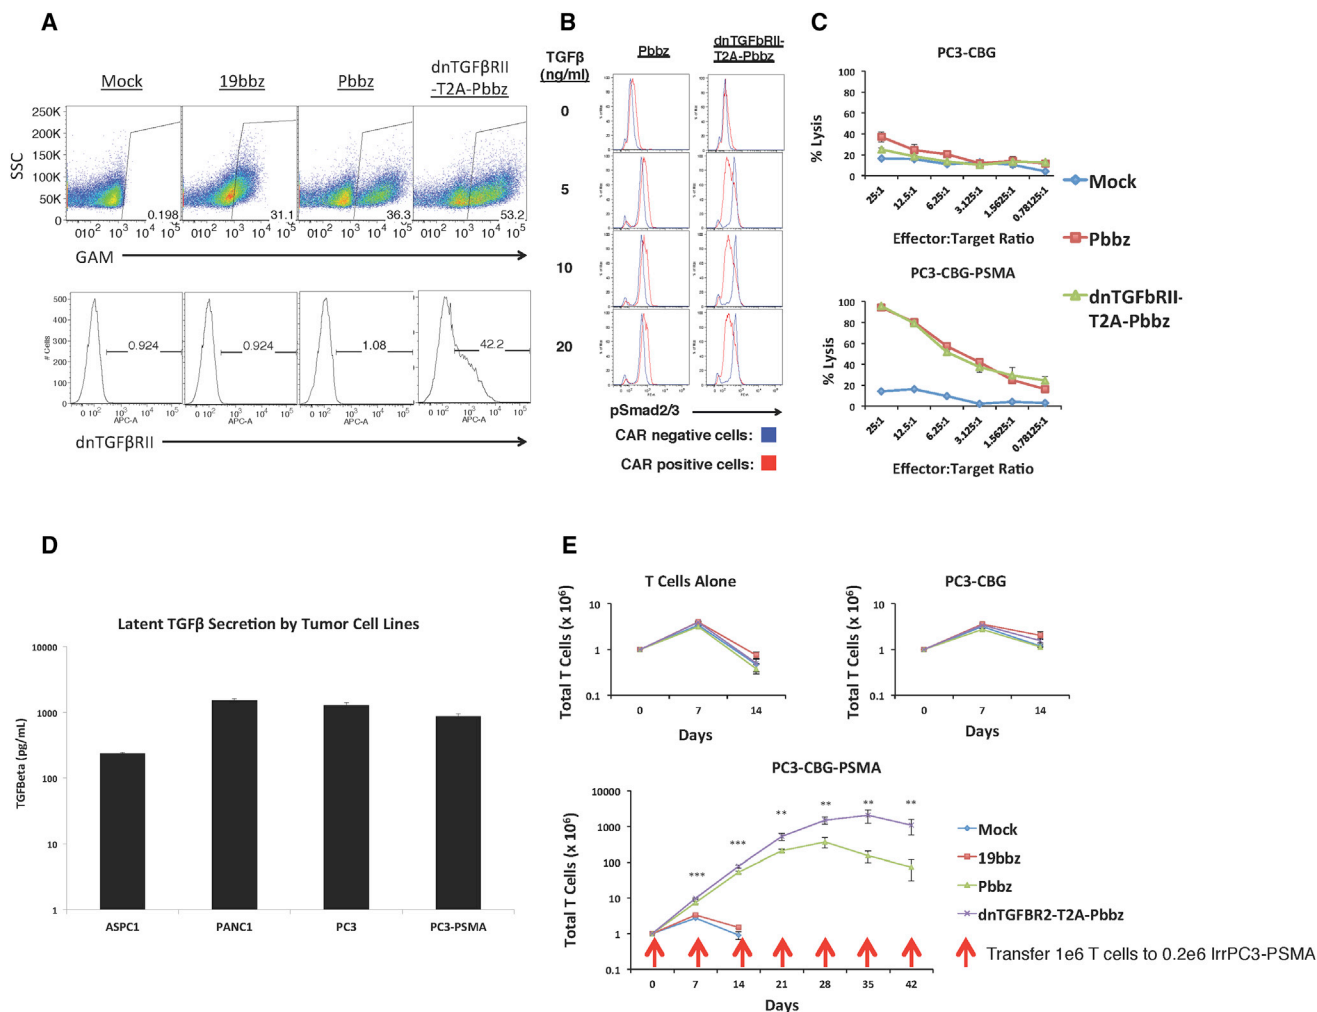

**Figure 1. In Vitro Functionality of Pbbz CAR and dnTGF-βRII-T2A-Pbbz CAR**

(A) Lentiviral transduction allows for efficient expression of 19bbz, Pbbz alone, or dnTGF-βRII-T2A-Pbbz in primary human T cells. (B) Expression of dnTGF-βRII prevents TGF-β signal induction through Smad2/3. (C) T cells expressing Pbbz specifically lyse PSMA<sup>+</sup> PC3 cells in 24-hr luciferase-based lysis assays. (D) ELISA determination of the secretion of the latent form of TGF-β by tumor lines. (E) Expression of dnTGF-βRII-T2A-Pbbz enhances antigen-specific proliferation of CAR T cells upon co-culture with PSMA<sup>+</sup> PC3 cells (y axis log<sub>10</sub> scale). The error bars represent ± SD. \*\*p < 0.01, and \*\*\*p < 0.001.

interactions, Jak-STAT, cell cycle, TCR signaling, and FcεRI signaling) and autoimmunity (inflammatory bowel disease, rheumatoid arthritis, systemic lupus erythematosus, and type I diabetes) that were statistically significant associations (false discovery rates for all < 0.005) (Table S2). The KEGG pathways identified on day 14 were similar. Finally, we also used the DEG to conduct gene ontology (GO) analysis. There were many biologic processes identified; the top 10 are shown in Table 1 and the entire list is shown in Table S3. The top GO terms identified on day 14 were biologic processes primarily related to effector immune responses, and on day 21, GO terms were related to cell cycle and cell division.

From these robust *in vitro* results, we postulated that the dnTGF-βRII-T2A-Pbbz CAR T cells had more sustained effector functions

in the presence of tumor cells that express TGF-β than the CAR alone, based on the enhanced cytokine and cell cycle gene expression data. To test this hypothesis *in vivo*, we infused the PC3-PSMA human prostate cancer cells into NOD/SCID IL-2gamma (NSG) mice, allowing disseminated tumors to form in the lung, liver, bone, kidney, stomach, pancreas, head, and spinal cord. In this model, the mice died 4–6 weeks following tumor injection. The PC3-PSMA cells were engineered to express luciferase, allowing tumor burden to be easily quantified. After allowing these tumors to engraft and disseminate for 2 weeks, we infused 5 × 10<sup>6</sup> CAR T cells by tail vein (Figure 4A). It is evident from the tumor burden quantification that the dnTGF-βRII-T2A-Pbbz CAR T cells functioned significantly better than Pbbz CAR T cells alone and eradicated the tumor from these mice (Figure 4B). The images confirm that

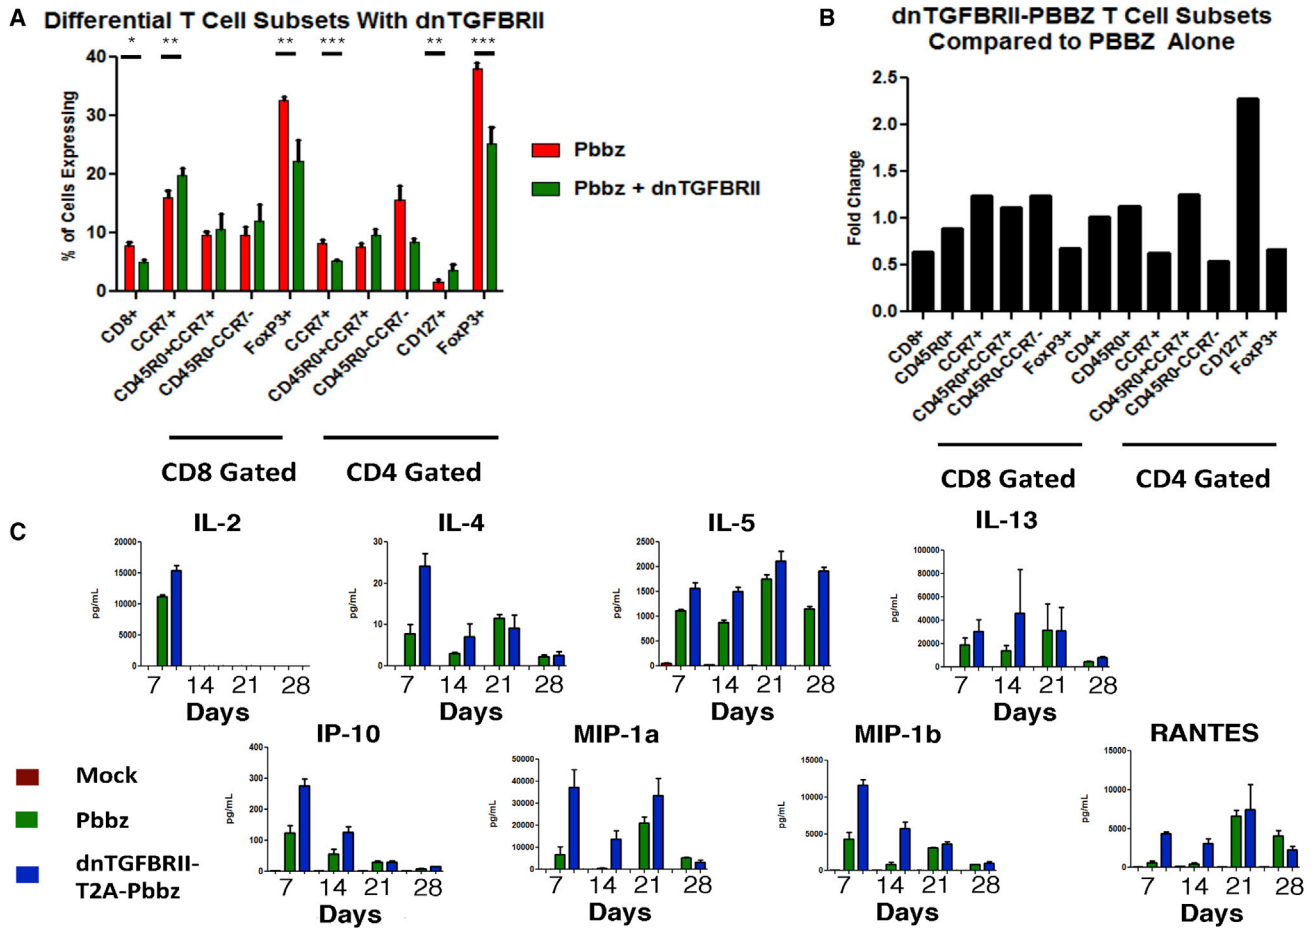

**Figure 2. Flow Cytometric and Multiplex Cytokine Profiling of CAR T Cell Subsets from PC3-PSMA Co-culture**

(A and B) T cells were analyzed with flow cytometry at day 21 post co-culture of Pbbz or dnTGF-βRII-T2A-Pbbz CAR T cells. (A) shows the differential percentage of various T cell subsets, which is further represented as fold change of T cell subsets found in the dnTGF-βRII-T2A-Pbbz versus Pbbz CAR T cells alone (B). (C) Luminex 30-Plex cytokine analysis was performed using T cell supernatants isolated at days 7, 14, 21, and 28 from Pbbz or dnTGF-βRII-T2A-Pbbz CAR T cells, as shown in Figure 1E. Pbbz-alone T cells, green bars; dnTGF-βRII-T2A-Pbbz T cells, blue bars. The error bars represent  $\pm$  SD. \* $p < 0.05$ , \*\* $p < 0.01$ , and \*\*\* $p < 0.001$ .

the dnTGF-βRII-T2A-Pbbz CAR T cells eliminated tumor in 4/4 mice, while the Pbbz T cells alone allowed for only 1/4 mice to achieve eradication (Figure 4C). In contrast all mice in the mock T cell group died from tumor progression 21–28 days after T cell injection. Interestingly, the levels of human T cells in the dnTGF-βRII-T2A-Pbbz group were 7 times higher in blood than the levels of Pbbz T cells, and 85% of these cells were CD4<sup>+</sup> CAR T cells (Figure 4D). In addition, the tumor-free mice in the dnTGF-βRII-T2A-Pbbz group began to have weight loss and developed signs of xenogeneic graft-versus-host disease (GVHD) (xGVHD), requiring euthanasia a month after CAR T cell infusion.

To further compare the CAR T cells *in vivo*, we used the PC3-PSMA NSG mouse metastatic prostate cancer model to perform a dose escalation trial of dnTGF-βRII-T2A-Pbbz PSMA CAR and Pbbz PSMA CAR T cells. At 2 weeks following tumor injection, doses of  $0.5 \times 10^6$  and  $2.5 \times 10^6$  CAR T cells were infused intravenously

(i.v.) (Figure 5A); note that the dose used in the first experiment was  $5 \times 10^6$  CAR T cells. In this experiment, we observed that the higher dose of dnTGF-βRII-T2A-Pbbz CAR T cells caused regression of tumor burden at day 14, while mice in the mock and CD19 CAR T cell control groups had progressive tumor burdens that required sacrifice according to predetermined endpoints of the protocol (Figure 5B). By day 42, 4/5 mice treated with PSMA dnTGF-βRII-T2A-Pbbz CAR T cells had tumor eradication (Figure 5D). In contrast, the mice given the lower dose of dnTGF-βRII-T2A-Pbbz CAR T cells had initial tumor control until day 21, followed by tumor relapse similar to the mice treated with PSMA Pbbz CAR T cells.

Intriguingly, the mice treated with the higher dose of dnTGF-βRII-T2A-Pbbz CAR T cells had a significant loss of body weight between days 28 and 35, but then they recovered to previous weight by day 42 following tumor elimination (Figure 5C). The mechanism of the reversible weight loss is not known, but it may be

**A**

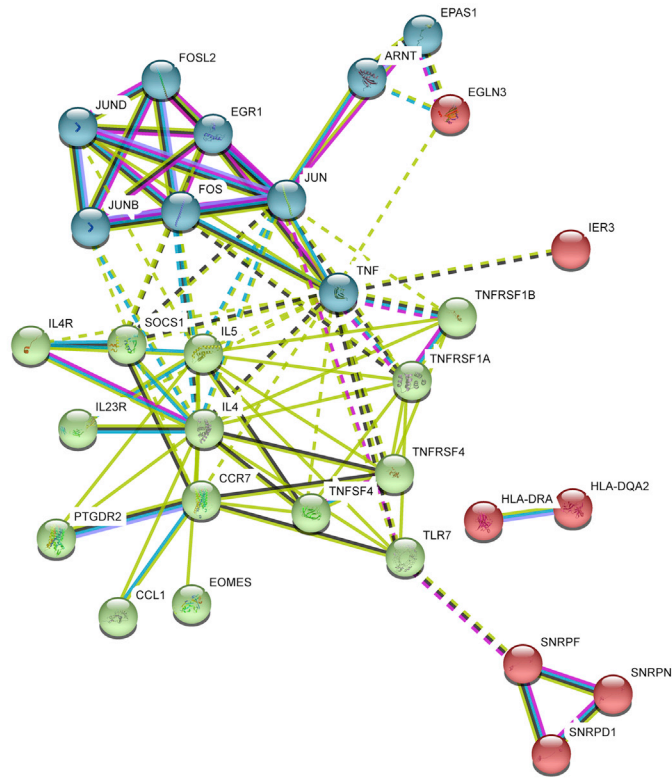

**B**

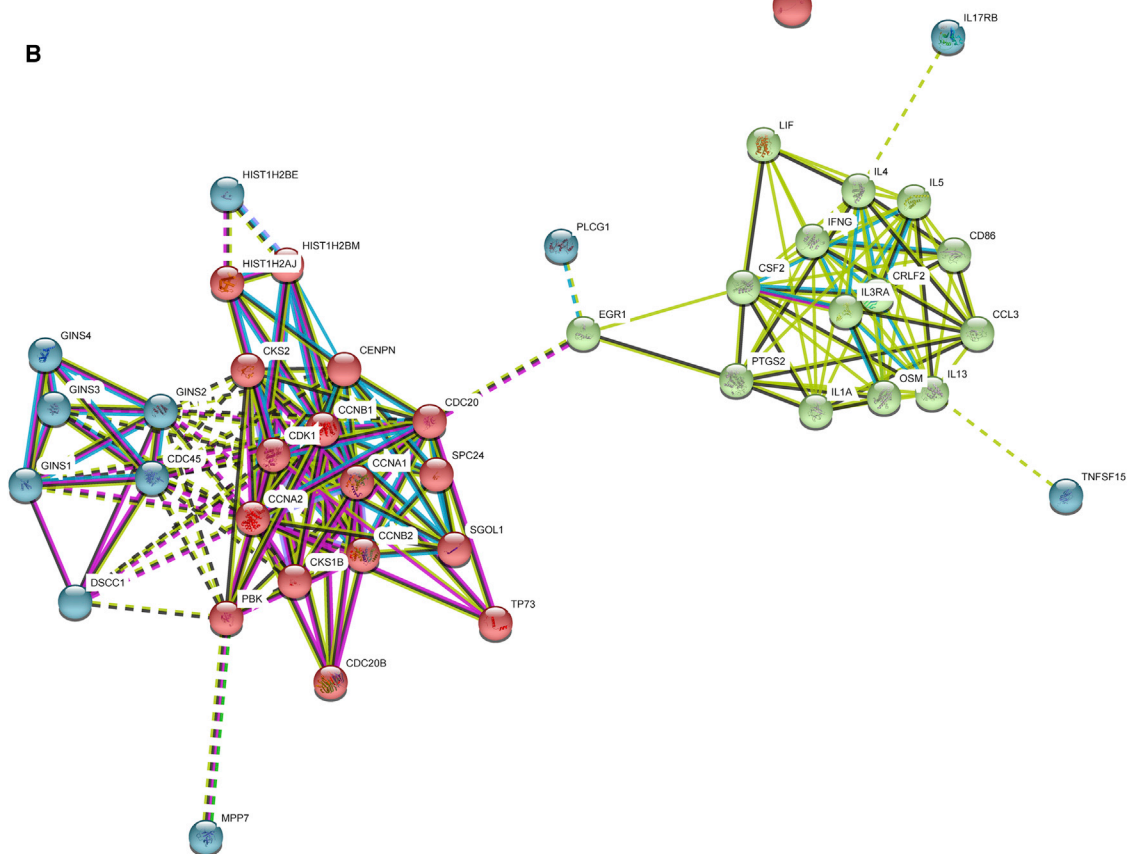

(legend on next page)

**Table 1. Pathway Analysis Showing Over-representation of Gene Ontology Biological Process Terms Related to Inflammation and Cell Cycle in dnTGF- $\beta$ RII-T2A-Pbbz PSMA CAR T Cells at Days 14 and 21 of Culture**

| Pathway ID | Pathway Description                              | Observed Gene Count | False Discovery Rate |
|------------|--------------------------------------------------|---------------------|----------------------|
| Day 14     |                                                  |                     |                      |
| GO.0034097 | response to cytokine                             | 14                  | 8.87E-08             |
| GO.0051707 | response to other organism                       | 14                  | 8.87E-08             |
| GO.1903708 | positive regulation of hemopoiesis               | 9                   | 9.32E-08             |
| GO.1902107 | positive regulation of leukocyte differentiation | 8                   | 4.32E-07             |
| GO.0033993 | response to lipid                                | 13                  | 3.61E-06             |
| GO.0032496 | response to lipopolysaccharide                   | 9                   | 5.37E-06             |
| GO.0002639 | positive regulation of immunoglobulin production | 5                   | 5.66E-06             |
| GO.0006954 | inflammatory response                            | 10                  | 1.01E-05             |
| GO.0031347 | regulation of defense response                   | 12                  | 1.19E-05             |
| GO.0009617 | response to bacterium                            | 10                  | 1.44E-05             |
| Day 21     |                                                  |                     |                      |
| GO.0000278 | mitotic cell cycle                               | 67                  | 2.00E-34             |
| GO.1903047 | mitotic cell cycle process                       | 57                  | 1.46E-27             |
| GO.0007049 | cell cycle                                       | 72                  | 7.91E-27             |
| GO.0022402 | cell cycle process                               | 62                  | 1.12E-24             |
| GO.0007067 | mitotic nuclear division                         | 39                  | 6.56E-24             |
| GO.0051301 | cell division                                    | 42                  | 8.18E-22             |
| GO.0000280 | nuclear division                                 | 40                  | 1.50E-21             |
| GO.0048285 | organelle fission                                | 41                  | 1.50E-21             |
| GO.0007059 | chromosome segregation                           | 27                  | 1.62E-18             |
| GO.0051726 | regulation of cell cycle                         | 45                  | 2.17E-13             |

The top 10 processes are listed; the complete list is shown in [Table S3](#).

related to cytokine release. It is also possible that the weight loss was related to overexpression of LIF in the dnTGF- $\beta$ RII-T2A-Pbbz CAR T cells,<sup>28</sup> a gene with >4-fold higher expression than in Pbbz CAR T cells with intact TGF signaling ([Table S1](#)). As in the first experiment, there were elevated levels of human CAR T cells found in the blood at days 33 and 64 in the high-dose dnTGF- $\beta$ RII-T2A-Pbbz CAR T cell group, with associated signs of xGVHD at day 64 ([Figure 5E](#)).

To further determine mechanisms leading to enhanced proliferation and antitumor efficacy of CAR T cells that are expressing the dnTGF- $\beta$ RII, we performed an additional *in vivo* experiment to inves-

tigate the effects of the dnTGF- $\beta$ RII on T cell differentiation. Mice were randomized to T cell treatment groups within the same cage of mice to control for unforeseen variables affecting T cell engraftment and proliferation, weight loss, and GVHD. Using a protocol like that shown in [Figure 4](#), mice were injected with  $5 \times 10^6$  CAR T cells, and we included 10 mice per group in anticipation of needing to sacrifice animals to necropsy to investigate the GVHD ([Figure 6A](#)). Similar to the previous animal experiments, the dnTGF- $\beta$ RII-T2A-Pbbz group had superior antitumor efficacy and controlled the tumors long-term, while the Pbbz group exhibited progressive cancer ([Figures 6B and 6D](#)).

Similar to the previous animal experiments, the dnTGF- $\beta$ RII-T2A-Pbbz group had progressive weight loss and developed signs of xGVHD around day 35, with all of the mice requiring euthanasia at approximately day 42 ([Figure 6C](#)). Confirming previous experiments, there was a striking enhancement of CAR T cells in the dnTGF- $\beta$ RII-T2A-Pbbz group of mice, as the mouse blood at day 35 contained approximately  $25 \times 10^6$  human CAR T cells per mL of mouse blood compared to less than  $1 \times 10^6$  CAR T cells per mL in the Pbbz T cell group. The CAR T cell lymphocytosis comprised both CD4+ and CD8+ T cells, with approximately a 2:1 CD4:CD8 ratio on day 35. Importantly, we found that the dnTGF- $\beta$ RII-T2A-Pbbz mice had significantly higher levels of central memory CD8+ T cells ([Figure 6E](#)). We did not observe any difference in the numbers of FoxP3+ T cells within the blood of these mice.

## DISCUSSION

Our results indicate that PSMA-specific, TGF- $\beta$ -insensitive (dnTGF- $\beta$ RII-T2A-Pbbz) CAR T cells can specifically eliminate advanced tumors that express PSMA. In addition, the PSMA-specific, TGF- $\beta$ -insensitive CAR T cells have a striking proliferative advantage over wild-type PSMA CAR T cells that retain TGF- $\beta$  signaling. These results have potential clinical utility, because all reported CAR T cell trials to date in patients with solid tumors have had disappointing CAR T cell expansion<sup>7,8</sup> that is several orders of magnitude that below CD19- and BCMA-specific CAR T cells employed for hematologic malignancies.<sup>29,30</sup>

From these long-term *in vitro* proliferation assays, we used multiple modalities to further characterize and interrogate the mechanisms for this enhanced proliferation upon TGF- $\beta$  blockade. Most interestingly, we identified a distinct transcriptional program in the T cells expressing PSMA Pbbz CAR and the dnTGF- $\beta$ RII-T2A-Pbbz CAR in the presence of TGF- $\beta$ , as there were 329 genes or microRNAs (miRNAs) that were differentially expressed by >2-fold after 21 days of culture.

The dnTGF- $\beta$ RII-T2A-Pbbz CAR T cells have enhanced cytokine signaling and secretion of a variety of cytokines that would be

**Figure 3. Protein-Protein Interactions in PSMA dnTGF- $\beta$ RII-T2A-Pbbz CAR T Cells**

A protein-protein interaction network was constructed using STRING, version 10.5, based on differentially expressed genes on days 14 (A) and 21 (B) of culture. Network nodes represent proteins and the edges represent protein-protein interactions (physical or functional). In (A), the network has 43 nodes and 91 edges, with a p value of  $1.3 \times 10^{-14}$  compared to random interactions. In (B), the network has 69 nodes and 182 edges, with a p value of  $<1.0 \times 10^{-16}$  compared to random interactions. The error bars represent  $\pm$  SD.

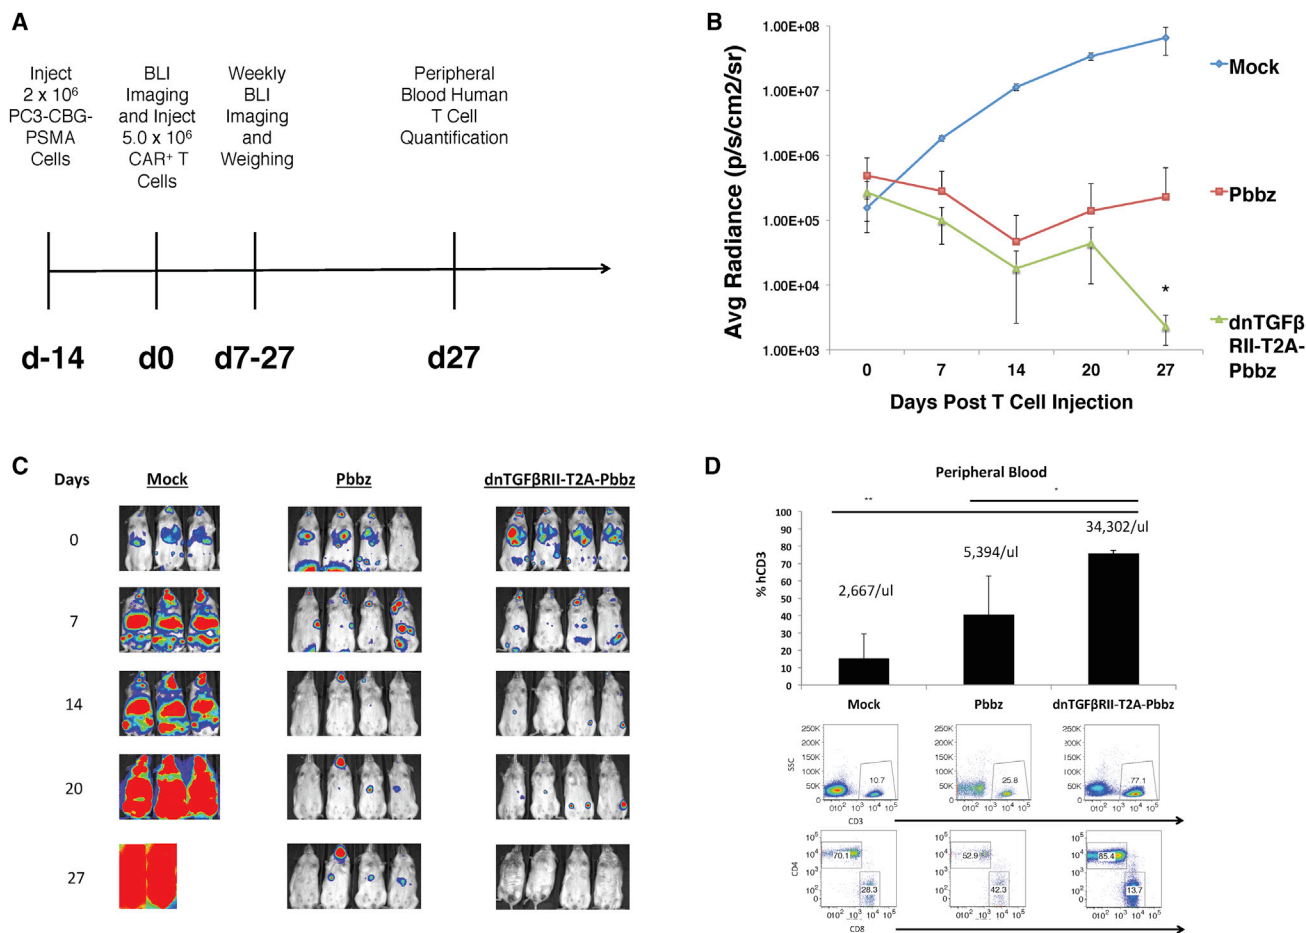

**Figure 4. dnTGF-βRII-T2A-Pbbz CAR T Cells Have Augmented Proliferation and Eradicate Metastatic Prostate Cancer In Vivo**

Systemic PC3-PSMA tumors were established by tail vein infusions of  $2 \times 10^6$  tumor cells with the timeline described in (A) treated by infusing  $5.0 \times 10^6$  CAR T cells or PBS (mock) per mouse 2 weeks later. Mice were assessed with bioluminescent imaging (BLI) weekly to assess tumor burden (B). Images of this BLI assessment are shown to demonstrate location and burden of tumors (C). Mice were bled at the end of the experiment at day 27 to assess the phenotype and the amounts of human CD3 T cells within the blood of these mice (D) ( $n = 4$  mice/group). The error bars represent  $\pm$  SD. \* $p < 0.05$  and \*\* $p < 0.01$ , determined using a Student's two-tailed t test.

expected to enhance innate and acquired immunity. The cytokine profile demonstrates a balanced  $T_H2$  phenotype with IL-4, IL-5, and IL-13 expression, as well as  $T_H1$  phenotype with IL-2; IFN- $\gamma$ ; and chemokines MIP1- $\alpha$ , MIP1- $\beta$ , and RANTES. In previous studies, CD4<sup>+</sup> T cells and tumor cells engineered to secrete IL-4 have been shown to have potent antitumor effects.<sup>31,32</sup>

In addition to enhanced cytokine secretion, we identified the expression of a major network of genes associated with cell cycle progression and cell division, as well as increased expression of transcription factors associated with robust T cell effector functions. The pronounced differential expression of cell cycle genes was late to emerge after 21 days of culture. It is possible that this simply reflects continued proliferation of the dnTGF-βRII-T2A-Pbbz CAR T cells, while the PSMA Pbbz CAR T cells become progressively exhausted with decreased proliferation. Previous studies have reported that chronic stimulation of CAR T cells can lead to exhaustion, terminal differen-

tiation, and apoptosis.<sup>33,34</sup> It is noteworthy that enhanced proliferation of the dnTGF-βRII-T2A-Pbbz CAR T cells was observed consistently *in vitro* and in all 3 *in vivo* experiments.

A third mechanism identified that may contribute to enhanced antitumor efficacy was a reduction of CD4<sup>+</sup>FoxP3<sup>+</sup> cells that was observed after 21 days of co-culture with PC3-PSMA tumor cells. Along with an increase of CD4<sup>+</sup> central memory and CD127<sup>+</sup> T cells, these effects would be expected to contribute to enhanced CAR T cell proliferation.<sup>35</sup>

From the three animal experiments, it is evident that the dnTGF-βRII allows for enhanced antitumor responses when using the Pbbz CAR, allowing for tumor eradication and sustained long-term proliferation and persistence of the T cells. We found that the dnTGF-βRII gave much higher numbers of human T cells within the blood of these mice, correlating with substantial weight loss and GVHD. Most of

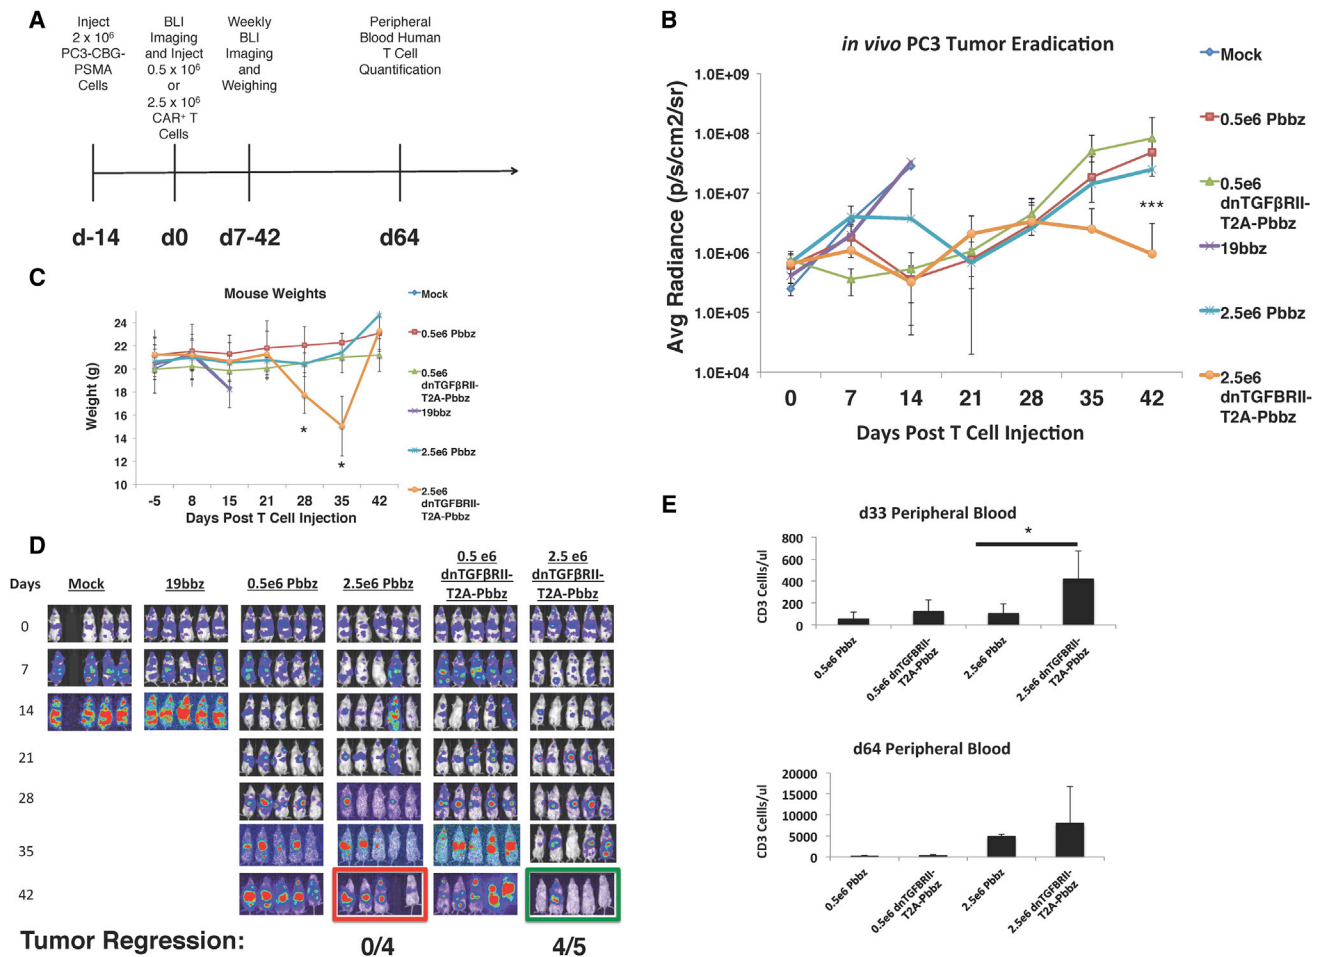

**Figure 5. Dose-Dependent Augmentation of CAR T Cell Proliferation and Antitumor Efficacy of dnTGF- $\beta$ RII CAR T Cells Compared to PSMA CAR T Cells *In Vivo***

Systemic PC3-PSMA tumors were established from intravenous (i.v.) infusions with the timeline described in (A), with varied doses of  $0.5 \times 10^6$  and  $2.5 \times 10^6$  CAR T cells per mouse infused 2 weeks later. Mice were assessed with BLI weekly to assess tumor burden (B). Body weight of the groups of mice is shown in (C). Images of this BLI assessment are shown to demonstrate location and burden of tumors (D). Mice were bled at days 33 and 64 to assess the amounts of human CD3 T cells within the blood of these mice (E) ( $n = 5$  mice/group). The error bars represent  $\pm$  SD. \* $p < 0.05$  and \*\*\* $p < 0.001$ .

the T cells were skewed to CD4<sup>+</sup> *in vivo*. Significantly higher amounts of CD8<sup>+</sup> central memory cells were observed with the dnTGF- $\beta$ RII-T2A-Pbbz group. These toxic effects of the dnTGF- $\beta$ RII-T2A-Pbbz CAR T cells are most likely due to enhanced xenogeneic effector functions of the CAR T cells.

A limitation of our approach is that the enhanced proliferation of the dnTGF- $\beta$ RII-T2A-Pbbz CAR T cells could lead to a lymphoproliferative syndrome, as has been reported in mice.<sup>20</sup> To date, we have not observed antigen or growth factor-independent proliferation of dnTGF- $\beta$ RII-T2A-Pbbz CAR T cells. A recent study has shown that mouse T cells can transform if haploinsufficient for PD-1.<sup>36</sup> It is possible that TGF- $\beta$  has a similar cell-intrinsic tumor suppressor function in T cells. The immunodeficient mouse models that we and others in the field use have not generally predicted toxicities

of CAR T cells, such as cytokine release syndrome or neurologic toxicity.<sup>37–39</sup>

Based on these encouraging preclinical results, we have initiated a clinical trial to infuse dnTGF- $\beta$ RII-T2A-PBBZ CAR T cells in a first-in-human study in patients with refractory castration-resistant metastatic prostate cancer (ClinicalTrials.gov: NCT03089203). Through these investigations, we hope to learn better methods to sustain and augment CAR T cell proliferation and effector function in patients with advanced solid tumors.

## MATERIALS AND METHODS

### Vector Design

mRNA was isolated using the RNeasy Plus Mini Kit (QIAGEN) from human peripheral blood mononuclear cells (PBMCs) to produce



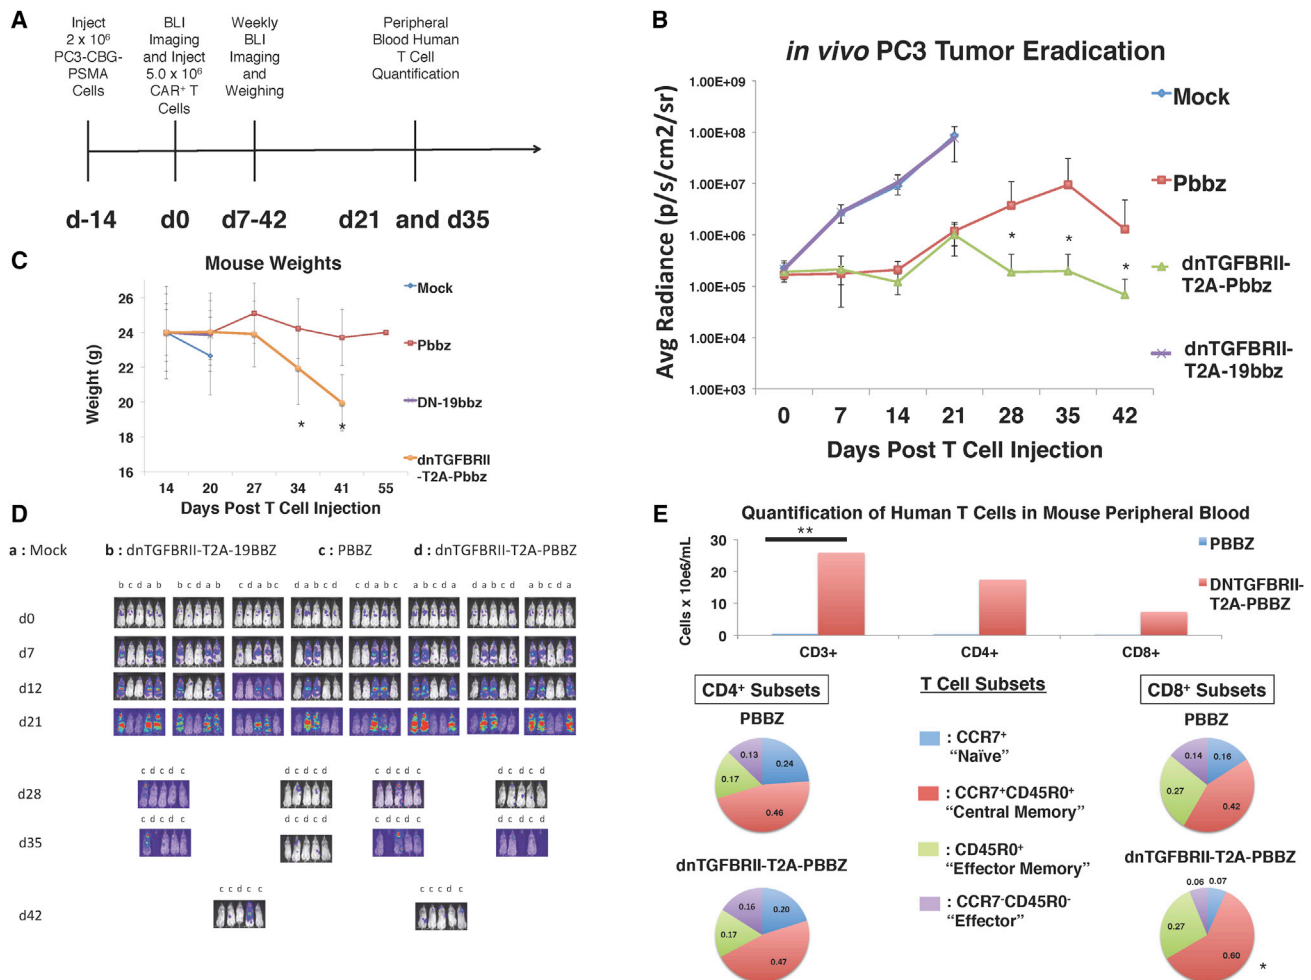

**Figure 6. Enhanced Survival and Central Memory PSMA dnTGF-βRII-T2A-Pbbz CAR T Cells In Vivo in Mice with Metastatic Prostate Cancer** Systemic PC3-PSMA tumors were established by tail vein infusion with the timeline described in (A) with a dose of  $5.0 \times 10^6$  CAR T cells per mouse infused 2 weeks later. Mice were assessed with BLI weekly to assess tumor burden (B). Body weight is shown in (C) and images of this BLI assessment are shown to demonstrate location and burden of tumors (D). (E) Mice were bled at the end of the experiment at day 35 to assess the amounts of human CD3<sup>+</sup> T cells within the blood of these mice. In depth analysis to assess T cell subsets was performed based on memory markers (CCR7, CD45R0, and CD127) (n = 10 mice/group). The error bars represent  $\pm$  SD. \*p < 0.05 and \*\*p < 0.01.

cDNA using RETROscript cDNA kit (Ambion). Primers were designed to amplify the TGF-βRII transcript variant 2 (NM\_003242), including a 5' BspEI site and a 3' NheI site. This was cloned into pELNS-tetR-T2A-Zeocin to replace the tetR cistron to form pELNS-TGF-βRII-T2A-Zeocin. Next, the TGF-βRII-T2A-Zeocin cassette was moved into the lentiviral expression plasmid from the Translational Research Program (pTRPE) lentiviral vector under the EF1α promoter utilizing the XbaI and SalI sites. A CAR was designed and synthesized by Geneart (Thermo Fisher Scientific) utilizing the variable light and heavy chains of the J591 antibody sequence from Dr. Neil Bander's (Weill Cornell Medical College) patent application (WO2002098897A2), fused to the 4-1BB intracellular domain sequence and CD3ζ intracellular domain sequences.<sup>40</sup> The dominant-negative TGF-βRII was constructed by truncating

the human TGFβRII to remove the intracellular kinase domain at residue 199 as originally reported.<sup>17</sup> Synthesized CAR DNA was digested with XbaI and SalI and inserted into pTRPE-TGF-βRII-T2A-Zeocin utilizing the Avr2 and SalI sites.

#### Lentiviral Vector Production and CAR T Cell Production

Lentiviral supernatants were collected from tripartite-transfected HEK293T cells and concentrated using ultracentrifugation, as described by Resier et al.<sup>41</sup> These lentiviral vectors were used to transduce normal donor human T cells isolated from PBMCs using anti-CD4 and anti-CD8 microbeads (Miltenyi Biotec) and activated for 24 hr with anti-CD3/CD28 Dynabeads (Thermo Fisher Scientific). Transduced T cells were expanded for around 9 days in R10 media consisting of RPMI media (Gibco) with 10% fetal bovine serum

(FBS) (HyClone), 4-(2-hydroxyethyl)-1-piperazineethanesulfonic acid (HEPES), penicillin, and streptomycin with 30 U/mL IL-2. CAR T cells were then cryopreserved in 90% FBS and 10% DMSO for future use.

### Cell Lines

The PC3 prostate cancer cell line, obtained from ATCC (CRL-1435), was isolated from a bone metastasis of a 62-year-old Caucasian with grade IV adenocarcinoma of the prostate. These cells grow to confluency *in vitro* within 3–4 days of being seeded at  $1 \times 10^4$  cells/cm<sup>2</sup> and cultured in D10 media consisting of DMEM with 10% FBS (HyClone), HEPES, penicillin, and streptomycin. The tumor cell line was regularly validated to be Mycoplasma free, and it was authenticated in 2016 by the University of Arizona Genetics Core (Tucson, AZ). Using pTRPE vectors, we transduced these PC3 cells with lentiviral vectors to express click beetle green luciferase with GFP for easy quantification of lysis and *in vivo* tumor burden. We then used another pTRPE lentiviral vector to introduce the PSMA protein into these cells. These PC3 cells were sorted to 99% purity for the desired vectors using a BD FACS Aria II.

### Flow Cytometry

A 4-laser LSRFortessa and a LSRII (Becton Dickinson) flow cytometer were used for analysis. Cells were stained in fluorescence-activated cell sorting (FACS) buffer (0.5% BSA Fraction V [Sigma], 2 mM EDTA [Life Technologies], in PBS [Life Technologies]) at 4°C for 30 min with the appropriate antibodies. For surface detection of the CAR, we used Jackson Laboratories Goat-anti-mouse PE-conjugated F(ab')<sub>2</sub> (115-116-072) antibody. The R&D Systems TGF-βRII antibody antigen-presenting cell (APC) conjugate (FAB2411A) was used to detect the dnTGF-βRII. To detect phosphor-SMAD2/3, we used BD Phosflow antibodies (562586) with the recommended intracellular staining products and protocols (BD Biosciences). The following antibodies were used for T cell phenotyping: CD3-BV605, CD4-BV510, CD127-BV711 (BioLegend), CCR7-FITC, CD8-APCH7, CD45RO-PE (Becton Dickinson), FoxP3-PE, and Helios-PerCP-Cy5.5 (eBiosciences). For FoxP3 and Helios staining, the recommended intranuclear staining products and protocols were used (eBiosciences). To process mouse blood for flow cytometry, 50 of 65 μL blood retroorbitally drawn was lysed on ice for 5 min with 2 mL  $1 \times$  RBC Lysis Buffer (BioLegend), centrifuged at 4°C for 5 min at  $500 \times g$ , washed twice with FACS buffer, and used for antibody staining. Countbright beads (Thermo Fisher Scientific) were used to determine the absolute number of cells per milliliter of blood.

### TGF-β ELISA

To reduce the amount of background TGF-β present in FBS, we serum starved these cells at 0.5% FBS in order to determine the amount of TGF-β truly secreted by the tumor cell lines. Cells were cultured at  $1 \times 10^6$  cells/well in 6-well plates for 24 hr and supernatants were harvested. To determine the amount of latent TGF-β secreted by tumor cell lines, the TGF-β ELISA kit (R&D Systems, DY240-05) was used to quantify the amount of TGF-β present in the supernatant. Undetectable amounts of mature TGF-β were observed, so

supernatant samples were treated for 10 min at room temperature (RT) with 1N HCL and neutralized with 1N NaOH with 0.5 M HEPES to cleave latent TGF-β into mature TGF-β.

### Tumor Lysis Assays

Since our PC3 cells were designed to express luciferase, the Promega Luciferase Reporter Assay System (E1910) was used to correlate luminescence to percentage cell lysis. By including tumor cells alone as 0% lysis and by completely lysing them in 0.01% Triton X-100 as 100% lysis, we established a sensitive method to detect percentage lysis of tumor cells by CAR T cells. After 16 hr of co-culture of PC3 cells with T cells at effector:target ratios from 0 to 25:1, cells were harvested, lysed, and luminescence was determined using the Promega system.

### T Cell *In Vitro* Proliferation Assay

PC3 cells were irradiated with 15 Gy irradiation and plated at  $0.2 \times 10^6$  cells per well of 12-well plates. 24 hr later,  $1 \times 10^6$  T cells total were plated with the irradiated PC3 cells in R10 media without any IL-2 added in 2 mL media. Media were added as necessary, usually 4 days after plating if cell densities were over  $1 \times 10^6$ /mL and media were yellowing for 4 mL media/well total.  $1 \times 10^6$  T cells from these cultures were taken and replated on freshly irradiated  $0.2 \times 10^6$  PC3 cells, and this assay was continued with replating T cells on irradiated tumor cells every week. Cell numbers and size were evaluated using a Beckman Coulter Multisizer 3 Cell Counter.

### Cytokine Analysis

Using the harvested supernatants 24 hr after plating co-cultures from these long-term proliferation assays, the human cytokine magnetic 30-Plex panel (Life Technologies LHC6003M) was used to quantify the following cytokines: IL-1RA, fibroblast growth factor (FGF)-basic, MCP-1, granulocyte colony-stimulating factor [G-CSF], IFN-γ, IL-12, IL-13, IL-7, granulocyte-macrophage colony-stimulating factor [GM-CSF], TNF-α, IL-1β, IL-2, IL-4, IL-5, IL-6, IFN-α, IL-15, IL-10, macrophage inflammatory protein [MIP]-1α, IL-17, IL-8, epidermal growth factor (EGF), human growth factor [HGF], vascular endothelial growth factor [VEGF], monokine induced by gamma IFN [MIG], RANTES, Eotaxin, MIP-1β, IFN-γ-induced protein 10 [IP-10], and IL-2R. Samples were measured on a FlexMAP 3D instrument (Luminex, Austin, TX) and evaluated with xPONENT software (Luminex).

### Global Gene Expression Profiling

Live cells were isolated from the long-term proliferation cultures using a dead cell removal kit (Miltenyi 130-090-101), and whole RNA was isolated using RNeasy Mini Isolation Kit (QIAGEN 74104). These samples were isolated in triplicate at multiple time points and were submitted to the Molecular Profiling Core Facility at the University of Pennsylvania. These samples were run on Human GeneChip Microarray 2.0 ST microarrays (Thermo Fisher Scientific), and analysis was performed using Transcriptome and Expression Analysis Console (Thermo Fisher Scientific). DEGs that were significant ( $p < 0.05$ ) were uploaded into STRING version (v.)10.5 *Homo*

*sapiens*,<sup>27</sup> which clusters genes into networks based on scored interactions, associations, and pathway knowledge drawn from databases such as KEGG and Gene Ontology and text mined from PubMed literature. Networks were constructed where the network edges were based on a minimum interaction confidence of 0.4, a maximum of 10 interactors, and the interaction sources were as follows: text-mining, experiments, databases, co-expression, neighborhood, gene fusion, and co-occurrence.

### Animal Experiments

The University of Pennsylvania Institutional Animal Care and Use Committee approved all animal experiments. Female NSG knockout (KO) mice were provided and housed by the University of Pennsylvania Stem Cell and Xenograft core. Using 200  $\mu$ L  $1 \times 10^6$  PC3-PSMA cells were injected intravenously via the tail vein. Tumors were established systemically for 2 weeks, upon which CAR T cells were then injected at various doses in the same manner. Bioluminescence imaging was performed by injecting mice weekly intraperitoneally with luciferin and quantifying luminescence using a Xenogen IVIS-200 Spectrum imaging system. Blood was drawn using glass capillary tubes from the retroorbital sinus. All experiments were performed via protocols approved by the Institutional Animal Care and Use Committee of the University of Pennsylvania.

### Statistics

All statistical analysis was performed using GraphPad Prism v.6 (GraphPad Software Inc.). For comparisons of 2 groups, 2-tailed unpaired t tests were used. Correlation was estimated by calculation of 2-tailed Pearson coefficients and significance. Data were transformed when needed to normalize variance. Power analysis was conducted using software as reported.<sup>42</sup> Symbols indicate statistical significance as follows: \* $p < 0.05$ , \*\* $p < 0.01$ , and \*\*\* $p < 0.005$ .

### SUPPLEMENTAL INFORMATION

Supplemental Information includes one figure and three tables and can be found with this article online at <https://doi.org/10.1016/j.ymthe.2018.05.003>.

### AUTHOR CONTRIBUTIONS

C.C.K. designed and performed experiments, analyzed data, interpreted results, and wrote the manuscript. J.L. contributed reagents, designed and performed experiments, and analyzed data. A.Z. and F.C. performed experiments. J.J.M. and S.F.L. designed experiments, interpreted results, and edited the manuscript. M.V.M. and Y.Z. designed experiments and interpreted results. J.A.F. contributed reagents, designed and performed experiments, analyzed data, interpreted results, and edited the manuscript. C.H.J. designed experiments, analyzed data, interpreted results, and wrote the manuscript.

### CONFLICTS OF INTEREST

Y.Z. submitted a patent application related to this work. The authors have sponsored research support from Tmunity.

### ACKNOWLEDGMENTS

This work was supported by grants from the Prostate Cancer Foundation to M.V.M., Y.Z., and C.H.J. and Young Investigator Awards to C.C.K. and J.L.

### REFERENCES

- Litwin, M.S., and Tan, H.J. (2017). The Diagnosis and Treatment of Prostate Cancer: A Review. *JAMA* 317, 2532–2542.
- Kwon, E.D., Drake, C.G., Scher, H.I., Fizazi, K., Bossi, A., van den Eertwegh, A.J., Krainer, M., Houede, N., Santos, R., Mahammed, H., et al.; CA184-043 Investigators (2014). Ipilimumab versus placebo after radiotherapy in patients with metastatic castration-resistant prostate cancer that had progressed after docetaxel chemotherapy (CA184-043): a multicentre, randomised, double-blind, phase 3 trial. *Lancet Oncol.* 15, 700–712.
- Chen, D.S., and Mellman, I. (2017). Elements of cancer immunity and the cancer-immune set point. *Nature* 541, 321–330.
- Huang, A.C., Postow, M.A., Orlovski, R.J., Mick, R., Bensch, B., Manne, S., Xu, W., Harmon, S., Giles, J.R., Wenz, B., et al. (2017). T-cell invigoration to tumour burden ratio associated with anti-PD-1 response. *Nature* 545, 60–65.
- Verdegaal, E.M., de Miranda, N.F., Visser, M., Harryvan, T., van Buuren, M.M., Andersen, R.S., Hadrup, S.R., van der Minne, C.E., Schotte, R., Spits, H., et al. (2016). Neoantigen landscape dynamics during human melanoma-T cell interactions. *Nature* 536, 91–95.
- June, C.H., Warshauer, J.T., and Bluestone, J.A. (2017). Is autoimmunity the Achilles' heel of cancer immunotherapy? *Nat. Med.* 23, 540–547.
- Sadelain, M., Rivière, I., and Riddell, S. (2017). Therapeutic T cell engineering. *Nature* 545, 423–431.
- Lim, W.A., and June, C.H. (2017). The Principles of Engineering Immune Cells to Treat Cancer. *Cell* 168, 724–740.
- Rabinovich, G.A., Gabrilovich, D., and Sotomayor, E.M. (2007). Immunosuppressive strategies that are mediated by tumor cells. *Annu. Rev. Immunol.* 25, 267–296.
- Joyce, J.A., and Fearon, D.T. (2015). T cell exclusion, immune privilege, and the tumor microenvironment. *Science* 348, 74–80.
- Chong, E.A., Melenhorst, J.J., Lacey, S.F., Ambrose, D.E., Gonzalez, V., Levine, B.L., June, C.H., and Schuster, S.J. (2017). PD-1 blockade modulates chimeric antigen receptor (CAR)-modified T cells: refueling the CAR. *Blood* 129, 1039–1041.
- Condomines, M., Arnason, J., Benjamin, R., Gunset, G., Plotkin, J., and Sadelain, M. (2015). Tumor-Targeted Human T Cells Expressing CD28-Based Chimeric Antigen Receptors Circumvent CTLA-4 Inhibition. *PLoS ONE* 10, e0130518.
- Siegel, P.M., and Massagué, J. (2003). Cytostatic and apoptotic actions of TGF- $\beta$  in homeostasis and cancer. *Nat. Rev. Cancer* 3, 807–821.
- Hanahan, D., and Weinberg, R.A. (2011). Hallmarks of cancer: the next generation. *Cell* 144, 646–674.
- Travis, M.A., and Sheppard, D. (2014). TGF- $\beta$  activation and function in immunity. *Annu. Rev. Immunol.* 32, 51–82.
- Ebner, R., Chen, R.H., Shum, L., Lawler, S., Zioncheck, T.F., Lee, A., Lopez, A.R., and Derynck, R. (1993). Cloning of a type I TGF-beta receptor and its effect on TGF-beta binding to the type II receptor. *Science* 260, 1344–1348.
- Wieser, R., Attisano, L., Wrana, J.L., and Massagué, J. (1993). Signaling activity of transforming growth factor beta type II receptors lacking specific domains in the cytoplasmic region. *Mol. Cell. Biol.* 13, 7239–7247.
- Gorelik, L., and Flavell, R.A. (2001). Immune-mediated eradication of tumors through the blockade of transforming growth factor-beta signaling in T cells. *Nat. Med.* 7, 1118–1122.
- Gorelik, L., and Flavell, R.A. (2000). Abrogation of TGFbeta signaling in T cells leads to spontaneous T cell differentiation and autoimmune disease. *Immunity* 12, 171–181.
- Lucas, P.J., Kim, S.J., Melby, S.J., and Gress, R.E. (2000). Disruption of T cell homeostasis in mice expressing a T cell-specific dominant negative transforming growth factor beta II receptor. *J. Exp. Med.* 191, 1187–1196.

21. Zhang, Q., Yang, X., Pins, M., Javonovic, B., Kuzel, T., Kim, S.J., Parijs, L.V., Greenberg, N.M., Liu, V., Guo, Y., and Lee, C. (2005). Adoptive transfer of tumor-reactive transforming growth factor-beta-insensitive CD8+ T cells: eradication of autologous mouse prostate cancer. *Cancer Res.* 65, 1761–1769.
22. Donkor, M.K., Sarkar, A., Savage, P.A., Franklin, R.A., Johnson, L.K., Jungbluth, A.A., Allison, J.P., and Li, M.O. (2011). T cell surveillance of oncogene-induced prostate cancer is impeded by T cell-derived TGF- $\beta$ 1 cytokine. *Immunity* 35, 123–134.
23. Foster, A.E., Dotti, G., Lu, A., Khalil, M., Brenner, M.K., Heslop, H.E., Rooney, C.M., and Bollard, C.M. (2008). Antitumor activity of EBV-specific T lymphocytes transduced with a dominant negative TGF-beta receptor. *J. Immunother.* 31, 500–505.
24. Bollard, C.M., Tripic, T., Cruz, C.R., Dotti, G., Gottschalk, S., Torrano, V., Dakhova, O., Carrum, G., Ramos, C.A., Liu, H., et al. (2018). Tumor-Specific T-Cells Engineered to Overcome Tumor Immune Evasion Induce Clinical Responses in Patients With Relapsed Hodgkin Lymphoma. *J. Clin. Oncol.* 36, 1128–1139.
25. Vallabhajosula, S., Nikolopoulou, A., Jhanwar, Y.S., Kaur, G., Tagawa, S.T., Nanus, D.M., Bander, N.H., and Goldsmith, S.J. (2016). Radioimmunotherapy of Metastatic Prostate Cancer with <sup>177</sup>Lu-DOTAhuJ591 Anti Prostate Specific Membrane Antigen Specific Monoclonal Antibody. *Curr. Radiopharm.* 9, 44–53.
26. Bander, N.H., Trabulsi, E.J., Kostakoglu, L., Yao, D., Vallabhajosula, S., Smith-Jones, P., Joyce, M.A., Milowsky, M., Nanus, D.M., and Goldsmith, S.J. (2003). Targeting metastatic prostate cancer with radiolabeled monoclonal antibody J591 to the extracellular domain of prostate specific membrane antigen. *J. Urol.* 170, 1717–1721.
27. Szklarczyk, D., Franceschini, A., Wyder, S., Forslund, K., Heller, D., Huerta-Cepas, J., Simonovic, M., Roth, A., Santos, A., Tsafou, K.P., et al. (2015). STRING v10: protein-protein interaction networks, integrated over the tree of life. *Nucleic Acids Res.* 43, D447–D452.
28. Beretta, E., Dhillon, H., Kalra, P.S., and Kalra, S.P. (2002). Central LIF gene therapy suppresses food intake, body weight, serum leptin and insulin for extended periods. *Peptides* 23, 975–984.
29. Kalos, M., Levine, B.L., Porter, D.L., Katz, S., Grupp, S.A., Bagg, A., and June, C.H. (2011). T cells with chimeric antigen receptors have potent antitumor effects and can establish memory in patients with advanced leukemia. *Sci. Transl. Med.* 3, 95ra73.
30. Ali, S.A., Shi, V., Maric, I., Wang, M., Stroncek, D.F., Rose, J.J., Brudno, J.N., Stetler-Stevenson, M., Feldman, S.A., Hansen, B.G., et al. (2016). T cells expressing an anti-B-cell maturation antigen chimeric antigen receptor cause remissions of multiple myeloma. *Blood* 128, 1688–1700.
31. Golumbek, P.T., Lazenby, A.J., Levitsky, H.I., Jaffee, L.M., Karasuyama, H., Baker, M., and Pardoll, D.M. (1991). Treatment of established renal cancer by tumor cells engineered to secrete interleukin-4. *Science* 254, 713–716.
32. Hung, K., Hayashi, R., Lafond-Walker, A., Lowenstein, C., Pardoll, D., and Levitsky, H. (1998). The central role of CD4(+) T cells in the antitumor immune response. *J. Exp. Med.* 188, 2357–2368.
33. Long, A.H., Haso, W.M., Shern, J.F., Wanhainen, K.M., Murgai, M., Ingaramo, M., Smith, J.P., Walker, A.J., Kohler, M.E., Venkateshwara, V.R., et al. (2015). 4-1BB costimulation ameliorates T cell exhaustion induced by tonic signaling of chimeric antigen receptors. *Nat. Med.* 21, 581–590.
34. Frigault, M.J., Lee, J., Basil, M.C., Carpenito, C., Motohashi, S., Scholler, J., Kawalekar, O.U., Guedan, S., McGettigan, S.E., Posey, A.D., Jr., et al. (2015). Identification of chimeric antigen receptors that mediate constitutive or inducible proliferation of T cells. *Cancer Immunol. Res.* 3, 356–367.
35. Lee, J.C., Hayman, E., Pegram, H.J., Santos, E., Heller, G., Sadelain, M., and Brentjens, R. (2011). In vivo inhibition of human CD19-targeted effector T cells by natural T regulatory cells in a xenotransplant murine model of B cell malignancy. *Cancer Res.* 71, 2871–2881.
36. Wartewig, T., Kurgyis, Z., Keppler, S., Pechloff, K., Hameister, E., Öllinger, R., Maresch, R., Buch, T., Steiger, K., Winter, C., et al. (2017). PD-1 is a haploinsufficient suppressor of T cell lymphomagenesis. *Nature* 552, 121–125.
37. Gust, J., Hay, K.A., Hanafi, L.A., Li, D., Myerson, D., Gonzalez-Cuyar, L.F., Yeung, C., Liles, W.C., Wurfel, M., Lopez, J.A., et al. (2017). Endothelial Activation and Blood-Brain Barrier Disruption in Neurotoxicity after Adoptive Immunotherapy with CD19 CAR-T Cells. *Cancer Discov.* 7, 1404–1419.
38. Fitzgerald, J.C., Weiss, S.L., Maude, S.L., Barrett, D.M., Lacey, S.F., Melenhorst, J.J., Shaw, P., Berg, R.A., June, C.H., Porter, D.L., et al. (2017). Cytokine Release Syndrome After Chimeric Antigen Receptor T Cell Therapy for Acute Lymphoblastic Leukemia. *Crit. Care Med.* 45, e124–e131.
39. Maude, S., and Barrett, D.M. (2016). Current status of chimeric antigen receptor therapy for hematological malignancies. *Br. J. Haematol.* 172, 11–22.
40. Milone, M.C., Fish, J.D., Carpenito, C., Carroll, R.G., Binder, G.K., Teachey, D., Samanta, M., Lakhai, M., Gloss, B., Danet-Desnoyers, G., et al. (2009). Chimeric receptors containing CD137 signal transduction domains mediate enhanced survival of T cells and increased antileukemic efficacy in vivo. *Mol. Ther.* 17, 1453–1464.
41. Kutner, R.H., Zhang, X.Y., and Reiser, J. (2009). Production, concentration and titration of pseudotyped HIV-1-based lentiviral vectors. *Nat. Protoc.* 4, 495–505.
42. Dupont, W.D., and Plummer, W.D., Jr. (1998). Power and sample size calculations for studies involving linear regression. *Control. Clin. Trials* 19, 589–601.

**Supplemental Information**

**Dominant-Negative TGF- $\beta$  Receptor Enhances  
PSMA-Targeted Human CAR T Cell Proliferation  
And Augments Prostate Cancer Eradication**

**Christopher C. Kloss, Jihyun Lee, Aaron Zhang, Fang Chen, Jan Joseph Melenhorst, Simon F. Lacey, Marcela V. Maus, Joseph A. Fraietta, Yangbing Zhao, and Carl H. June**

**Supplemental Figure 1. Whole transcriptome microarray hierarchical clustergram analysis of dnTGFβRII expressing PSMA CAR T cells.** Total live T cell mRNA was analyzed after 7 days (**A**), 14 days (**B**), and 21 days (**C**) of PC3-PSMA tumor cell coculture with T cells from 1) PBBZ group (Orange) or 2) PBBZ + dnTGFβRII (Green). Clustergram analysis clusters significantly differentially expressed genes into similar pathways. The scalebar indicates the level expression of individual genes.

**A** D7 Pbbz vs.  
dnTGFBRII-T2A-Pbbz

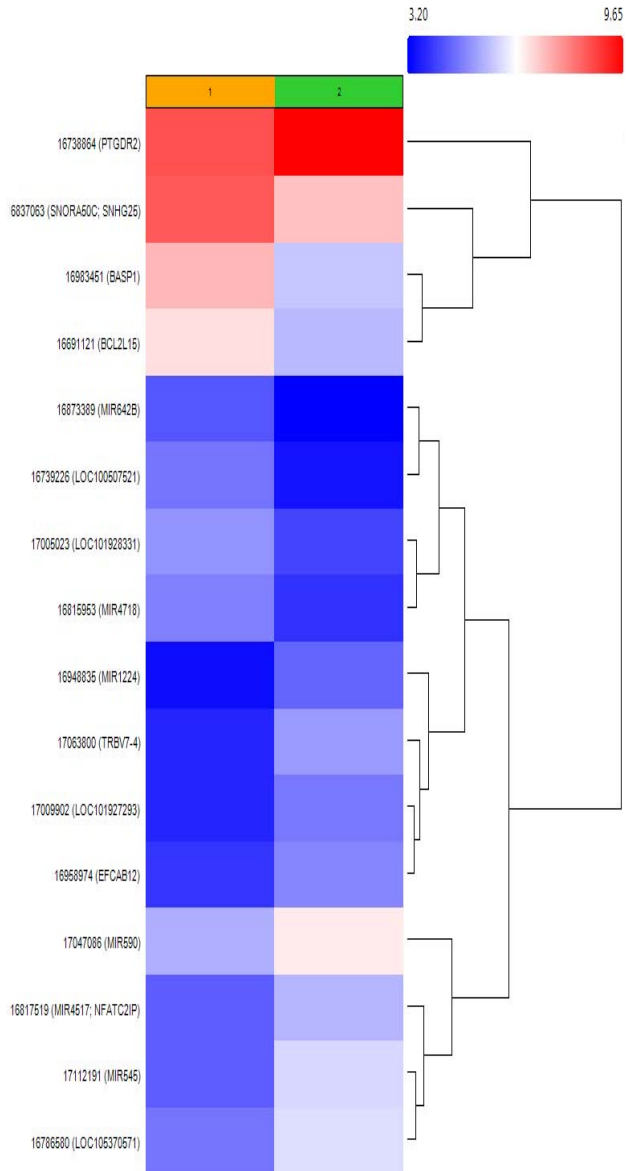

**B** D14 Pbbz vs.  
dnTGFBRII-T2A-Pbbz

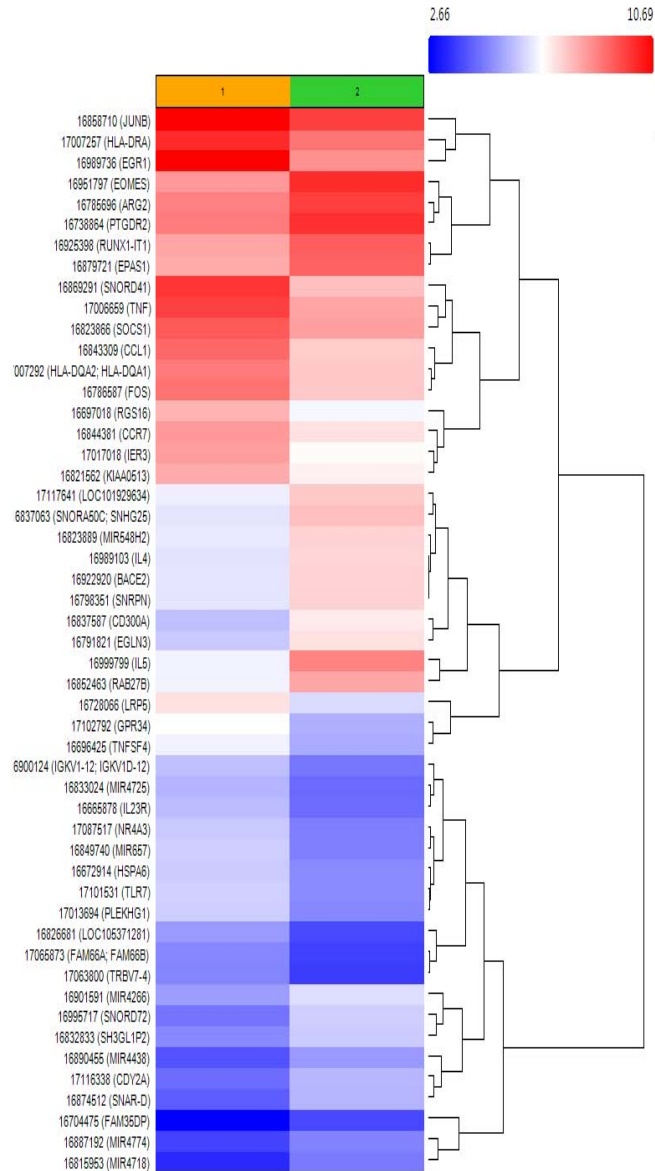

**C** D21 Pbbz vs.  
dnTGFBRII-T2A-Pbbz

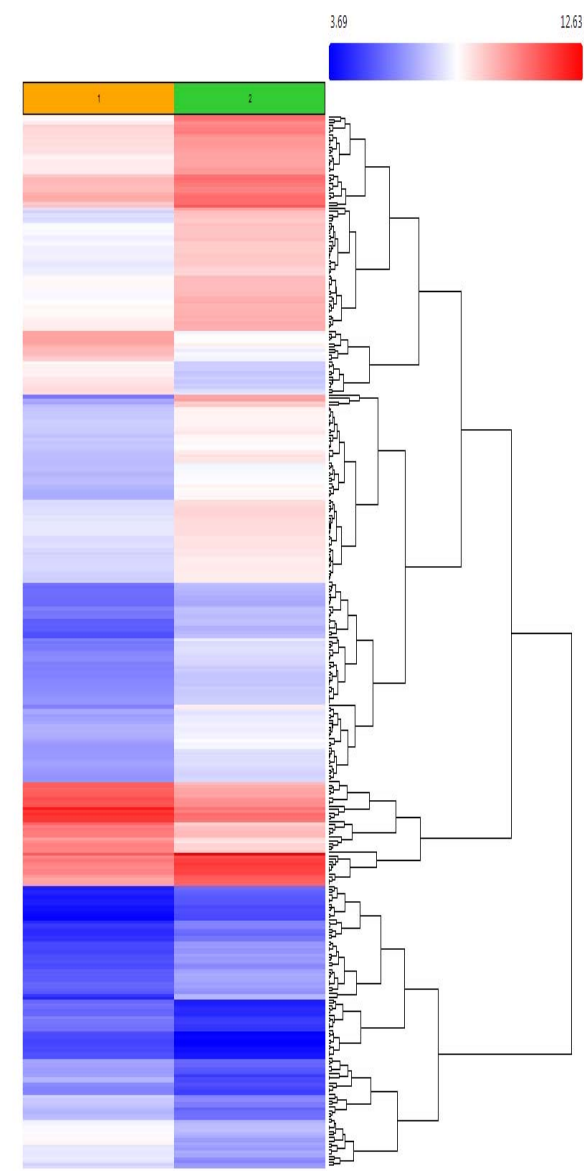

Supplemental Table 1.

| Day 7      |             |                   | Day 14     |             |                     | Day 21     |             |                |
|------------|-------------|-------------------|------------|-------------|---------------------|------------|-------------|----------------|
| Gene/MIR # | Fold Change | Gene Symbol       | Gene/MIR # | Fold Change | Gene Symbol         | Gene/MIR # | Fold Change | Gene Symbol    |
| 1          | 2.98        | MIR545            | 1          | 4.46        | IL5                 | 1          | 15.05       | IL5            |
| 2          | 2.87        | TRBV7-4           | 2          | 3.24        | EOMES               | 2          | 8.81        | IL13           |
| 3          | 2.51        | LOC105370571      | 3          | 2.98        | RAB27B              | 3          | 6.29        | APOD           |
| 4          | 2.39        | MIR590            | 4          | 2.71        | SNORD72             | 4          | 5.91        | IL4            |
| 5          | 2.19        | MIR4517; NFATC2IP | 5          | 2.68        | SNAR-D              | 5          | 5.39        | EGR1           |
| 6          | 2.17        | MIR1224           | 6          | 2.63        | SNORA50C; SNHG25    | 6          | 5.07        | EPAS1          |
| 7          | 2.08        | LOC101927293      | 7          | 2.52        | CD300A              | 7          | 4.63        | SLCO4C1        |
| 8          | 2.04        | PTGDR2            | 8          | 2.5         | EGLN3               | 8          | 4.44        | LIF            |
| 9          | 2.04        | EFCAB12           | 9          | 2.45        | MIR4718             | 9          | 4.35        | RAB27B         |
| 10         | -2.01       | LOC101928331      | 10         | 2.28        | PTGDR2              | 10         | 4.03        | LOC101928173   |
| 11         | -2.03       | MIR4718           | 11         | 2.28        | CDY2A               | 11         | 3.96        | IFNG           |
| 12         | -2.15       | MIR642B           | 12         | 2.2         | MIR4438             | 12         | 3.9         | SLC7A8         |
| 13         | -2.36       | LOC100507521      | 13         | 2.2         | FAM35DP             | 13         | 3.76        | RNU5D-1        |
| 14         | -2.43       | BCL2L15           | 14         | 2.19        | EPAS1               | 14         | 3.57        | DUSP6          |
| 15         | -2.51       | SNORA50C; SNHG25  | 15         | 2.15        | IL4                 | 15         | 3.57        | OSM            |
| 16         | -3.09       | BASP1             | 16         | 2.15        | BACE2               | 16         | 3.49        | TNFSF15        |
|            |             |                   | 17         | 2.15        | SNRPN               | 17         | 3.48        | CSF2           |
|            |             |                   | 18         | 2.12        | RUNX1-IT1           | 18         | 3.33        | LOC100505478   |
|            |             |                   | 19         | 2.12        | LOC101929634        | 19         | 3.27        | IL3RA          |
|            |             |                   | 20         | 2.07        | MIR548H2            | 20         | 3.25        | IL17RB         |
|            |             |                   | 21         | 2.05        | MIR4774             | 21         | 3.21        | GIN52          |
|            |             |                   | 22         | 2.04        | SH3GL1P2            | 22         | 3.2         | IL3RA          |
|            |             |                   | 23         | 2.03        | ARG2                | 23         | 3.2         | FAM72D; FAM72C |
|            |             |                   | 24         | 2.02        | MIR4266             | 24         | 3.2         | PTGS2          |
|            |             |                   | 25         | -2.01       | HSPA6               | 25         | 3.17        | TP73           |
|            |             |                   | 26         | -2.04       | JUNB                | 26         | 3.15        | ARG2           |
|            |             |                   | 27         | -2.04       | LRP5                | 27         | 3.15        | HIST1H2BE      |
|            |             |                   | 28         | -2.07       | SOCS1               | 28         | 3.07        | CCNA1          |
|            |             |                   | 29         | -2.14       | TLR7                | 29         | 3.07        | IL1A           |
|            |             |                   | 30         | -2.16       | TNFSF4 (AKA OX4C)   | 30         | 3.03        | IFI30          |
|            |             |                   | 31         | -2.16       | KIAA0513            | 31         | 3.03        | HIST1H2BM      |
|            |             |                   | 32         | -2.18       | CCR7                | 32         | 3.01        | MCOLN3         |
|            |             |                   | 33         | -2.18       | FAM66A; FAM66B      | 33         | 2.99        | HIST1H2AJ      |
|            |             |                   | 34         | -2.19       | PLEKHG1             | 34         | 2.98        | CENPN          |
|            |             |                   | 35         | -2.22       | HLA-DRA             | 35         | 2.98        | DSCC1          |
|            |             |                   | 36         | -2.24       | IGKV1-12; IGKV1D-12 | 36         | 2.97        | CCL3           |
|            |             |                   | 37         | -2.25       | NR4A3               | 37         | 2.92        | CRLF2          |
|            |             |                   | 38         | -2.26       | TRBV7-4             | 38         | 2.84        | CPM            |
|            |             |                   | 39         | -2.29       | HLA-DQA2; HLA-DQA1  | 39         | 2.81        | CDC20B         |
|            |             |                   | 40         | -2.32       | MIR4725             | 40         | 2.78        | GPAT3          |
|            |             |                   | 41         | -2.37       | IL23R               | 41         | 2.78        | CD86           |
|            |             |                   | 42         | -2.38       | MIR657              | 42         | 2.78        | PBK            |
|            |             |                   | 43         | -2.38       | GPR34               | 43         | 2.77        | FAM72A         |
|            |             |                   | 44         | -2.44       | LOC105371281        | 44         | 2.77        | MT1G           |
|            |             |                   | 45         | -2.5        | RGS16               | 45         | 2.76        | APOO           |
|            |             |                   | 46         | -2.51       | FOS                 | 46         | 2.73        | RNVU1-14       |
|            |             |                   | 47         | -2.78       | IER3                | 47         | 2.71        | LOC100240735   |
|            |             |                   | 48         | -2.87       | CCL1                | 48         | 2.7         | SPC24          |
|            |             |                   | 49         | -2.95       | TNF                 | 49         | 2.7         | SGOL1          |
|            |             |                   | 50         | -4.48       | SNORD41             | 50         | 2.68        | CDK1           |
|            |             |                   | 51         | -4.76       | EGR1                | 51         | 2.68        | MIR221         |
|            |             |                   |            |             |                     | 52         | 2.67        | CCL3L3; CCL3L1 |
|            |             |                   |            |             |                     | 53         | 2.65        | UBE2T          |
|            |             |                   |            |             |                     | 54         | 2.64        | SAMD5          |
|            |             |                   |            |             |                     | 55         | 2.62        | PTPN14         |
|            |             |                   |            |             |                     | 56         | 2.61        | CLECL1         |
|            |             |                   |            |             |                     | 57         | 2.61        | CDC20          |
|            |             |                   |            |             |                     | 58         | 2.61        | CDC6           |
|            |             |                   |            |             |                     | 59         | 2.6         | HPGDS          |
|            |             |                   |            |             |                     | 60         | 2.6         | CDKN3          |



|     |                    |
|-----|--------------------|
| 61  | 2.6 TK1            |
| 62  | 2.6 OSBPL6         |
| 63  | 2.58 ITGA11        |
| 64  | 2.57 ASF1B         |
| 65  | 2.57 GUCY1B3       |
| 66  | 2.55 CCL1          |
| 67  | 2.55 CLSPN         |
| 68  | 2.55 HIST1H3H      |
| 69  | 2.55 HIST1H3G      |
| 70  | 2.54 SHCBP1        |
| 71  | 2.54 SPC25         |
| 72  | 2.54 LRRCC1        |
| 73  | 2.53 SPAG5         |
| 74  | 2.53 GINS4         |
| 75  | 2.5 TRAV9-1        |
| 76  | 2.5 C17orf58       |
| 77  | 2.5 DMC1           |
| 78  | 2.5 RPL39L         |
| 79  | 2.49 PLK1          |
| 80  | 2.48 PLPP1         |
| 81  | 2.48 CSAG3; CSAG2  |
| 82  | 2.48 CSAG3; CSAG2  |
| 83  | 2.48 SIGLEC17P     |
| 84  | 2.48 IFITM3        |
| 85  | 2.48 SKA1          |
| 86  | 2.48 HIST1H2AI     |
| 87  | 2.47 HBEGF         |
| 88  | 2.47 MTFR2         |
| 89  | 2.46 LOC105375905  |
| 90  | 2.46 HIST1H3J      |
| 91  | 2.44 CCNB1         |
| 92  | 2.43 DEPDC1        |
| 93  | 2.42 IL1RL1        |
| 94  | 2.42 GZMK          |
| 95  | 2.41 EXO1          |
| 96  | 2.41 CEP55         |
| 97  | 2.41 FOSL1         |
| 98  | 2.4 MYBL1          |
| 99  | 2.38 MYBL2         |
| 100 | 2.38 CCNE2         |
| 101 | 2.37 ESCO2         |
| 102 | 2.36 DTL           |
| 103 | 2.36 CENPW         |
| 104 | 2.35 KIF14         |
| 105 | 2.35 HIST1H4B      |
| 106 | 2.35 CDR1          |
| 107 | 2.33 LINC01123     |
| 108 | 2.33 MT2A          |
| 109 | 2.33 TNF           |
| 110 | 2.32 GAB2          |
| 111 | 2.32 RAD54L        |
| 112 | 2.32 SOCS1         |
| 113 | 2.32 CRNDE         |
| 114 | 2.32 NQO1          |
| 115 | 2.31 STX3; OR10Y1P |
| 116 | 2.31 XRCC2         |
| 117 | 2.3 PMCH           |
| 118 | 2.3 CCL4L2; CCL4L1 |
| 119 | 2.29 MYO1B         |
| 120 | 2.28 BACE2         |
| 121 | 2.28 SMAGP         |
| 122 | 2.28 CCNB2         |
| 123 | 2.27 LOC101928865  |
| 124 | 2.27 GZMB          |

|     |                       |
|-----|-----------------------|
| 125 | 2.27 KIAA0101         |
| 126 | 2.27 SIGLEC6          |
| 127 | 2.27 CENPU            |
| 128 | 2.27 CENPH            |
| 129 | 2.27 HIST1H2BF        |
| 130 | 2.26 FAM111B          |
| 131 | 2.25 SPP1             |
| 132 | 2.25 LOC105370594     |
| 133 | 2.24 FOXM1            |
| 134 | 2.24 TUBA1B; TUBA1A   |
| 135 | 2.24 CCL4             |
| 136 | 2.24 KIR3DL2; KIR3DL1 |
| 137 | 2.23 ZWINT            |
| 138 | 2.23 SKA3             |
| 139 | 2.23 LINC01106        |
| 140 | 2.23 CDC45            |
| 141 | 2.23 DTHD1            |
| 142 | 2.23 HMGN5            |
| 143 | 2.22 TYMS             |
| 144 | 2.22 MAD2L1           |
| 145 | 2.22 HIST1H2BL        |
| 146 | 2.21 TOM1L1           |
| 147 | 2.21 CREG1            |
| 148 | 2.21 KLF5             |
| 149 | 2.21 HIST1H1B         |
| 150 | 2.21 ANLN             |
| 151 | 2.21 CLU; MIR6843     |
| 152 | 2.2 KLHL11            |
| 153 | 2.2 FCER1G            |
| 154 | 2.2 ORC1              |
| 155 | 2.2 MIR3665           |
| 156 | 2.19 TRBV7-4          |
| 157 | 2.19 SPOCK1           |
| 158 | 2.19 PRR11            |
| 159 | 2.19 RRM2             |
| 160 | 2.19 UBE2C            |
| 161 | 2.18 ORC6             |
| 162 | 2.17 ICAM1            |
| 163 | 2.17 STX11            |
| 164 | 2.17 CD9              |
| 165 | 2.17 MCM10            |
| 166 | 2.17 HIST1H3F         |
| 167 | 2.17 MELK             |
| 168 | 2.16 GAS2L3           |
| 169 | 2.16 NPC2; MIR4709    |
| 170 | 2.16 LOC105371152     |
| 171 | 2.16 DONSON           |
| 172 | 2.15 PDLIM5           |
| 173 | 2.15 RAB23            |
| 174 | 2.14 KCCAT198         |
| 175 | 2.14 CCNE1            |
| 176 | 2.14 KIF20A           |
| 177 | 2.14 DEPDC1B          |
| 178 | 2.13 NDC80            |
| 179 | 2.12 TMPO-AS1         |
| 180 | 2.12 KIF23            |
| 181 | 2.12 TPMT             |
| 182 | 2.11 DCLRE1B          |
| 183 | 2.11 PLA2G4A          |
| 184 | 2.11 DLGAP5           |
| 185 | 2.1 CDCA8             |
| 186 | 2.1 NUF2              |
| 187 | 2.1 ESPL1             |
| 188 | 2.1 TICRR             |

|     |                                                                 |
|-----|-----------------------------------------------------------------|
| 189 | 2.1 HMMR                                                        |
| 190 | 2.1 CENPQ                                                       |
| 191 | 2.09 NEK2                                                       |
| 192 | 2.09 DIAPH3                                                     |
| 193 | 2.09 RAD51                                                      |
| 194 | 2.09 BIRC5                                                      |
| 195 | 2.09 RNF130                                                     |
| 196 | 2.09 SPAG1                                                      |
| 197 | 2.08 FEN1; FADS2                                                |
| 198 | 2.07 BRCA2                                                      |
| 199 | 2.07 GINS1                                                      |
| 200 | 2.06 TLCD2                                                      |
| 201 | 2.06 BCRP3                                                      |
| 202 | 2.06 NCAPH                                                      |
| 203 | 2.05 CDC7                                                       |
| 204 | 2.05 GATA3-AS1                                                  |
| 205 | 2.05 EME1                                                       |
| 206 | 2.05 PSMC3IP                                                    |
| 207 | 2.05 TMEM237                                                    |
| 208 | 2.05 ECT2                                                       |
| 209 | 2.05 TTK                                                        |
| 210 | 2.04 YES1                                                       |
| 211 | 2.04 ANPEP                                                      |
| 212 | 2.04 RFC5                                                       |
| 213 | 2.04 CLN6                                                       |
| 214 | 2.04 CDT1                                                       |
| 215 | 2.04 PMAIP1                                                     |
| 216 | 2.04 BHLHE40-AS1                                                |
| 217 | 2.04 NCAPG                                                      |
| 218 | 2.04 MND1                                                       |
| 219 | 2.04 CCNA2                                                      |
| 220 | 2.04 TRGV3; TRGC2                                               |
| 221 | 2.03 ETV7                                                       |
| 222 | 2.03 AURKB                                                      |
| 223 | 2.03 TLR3                                                       |
| 224 | 2.02 CLEC7A                                                     |
| 225 | 2.02 IRX3                                                       |
| 226 | 2.02 RNVU1-3                                                    |
| 227 | 2.02 RNVU1-3                                                    |
| 228 | 2.02 TMTC1                                                      |
| 229 | 2.02 CD200                                                      |
| 230 | 2.02 PEX5L                                                      |
| 231 | 2.02 SLC7A11                                                    |
| 232 | 2.02 CENPP                                                      |
| 233 | 2.01 CDCA5                                                      |
| 234 | 2.01 E2F7                                                       |
| 235 | 2.01 GOLGA8J                                                    |
| 236 | 2.01 CDCA2                                                      |
| 237 | -2.01 SNORD61; RBMX                                             |
| 238 | -2.01 KLRC2; KLRC3                                              |
| 239 | -2.02 GUSBP3                                                    |
| 240 | -2.03 PLCG1; RPL23AP81                                          |
| 241 | -2.03 TAS2R31                                                   |
| 242 | -2.03 SNORD116-6                                                |
| 243 | -2.04 RNU6-82P                                                  |
| 244 | -2.04 SNORD116-19; SNORD116-17;<br>SNORD116-19;<br>SNORD116-17; |
| 245 | -2.04 SNRPN; IPW                                                |
| 246 | -2.04 USP6                                                      |
| 247 | -2.06 PWAR5; SNORD108                                           |
| 248 | -2.06 ERMN                                                      |
| 249 | -2.06 MIR1234; CPSF1                                            |
| 250 | -2.07 PPIAL4E; PPIAL4D; PPIAL4F                                 |

|     |                           |
|-----|---------------------------|
| 251 | -2.07 SNORD116-2          |
| 252 | -2.08 POM121L8P           |
| 253 | -2.09 ABLIM1              |
| 254 | -2.1 SNORA12              |
| 255 | -2.1 SORL1                |
| 256 | -2.1 SCARNA11             |
| 257 | -2.1 CCDC141              |
| 258 | -2.11 LOC105371220        |
| 259 | -2.11 PLXNA4              |
| 260 | -2.12 IGKV1-12; IGKV1D-12 |
| 261 | -2.12 CD44                |
| 262 | -2.12 RNU4ATAC            |
| 263 | -2.12 SNORA9; SNHG15      |
| 264 | -2.13 SNORA50A            |
| 265 | -2.13 MIR766              |
| 266 | -2.15 B3GALT2             |
| 267 | -2.15 DPRXP4              |
| 268 | -2.17 SPNS3               |
| 269 | -2.17 GPR155              |
| 270 | -2.17 MIR4253             |
| 271 | -2.17 KRT16P3             |
| 272 | -2.17 LOC100128751        |
| 273 | -2.18 ANKRD44-IT1         |
| 274 | -2.19 SNORD46             |
| 275 | -2.22 SNORD91B            |
| 276 | -2.23 MIR4729             |
| 277 | -2.23 AQP7                |
| 278 | -2.25 SNORD71             |
| 279 | -2.26 MIR601              |
| 280 | -2.27 MIR4506             |
| 281 | -2.3 SCARNA5              |
| 282 | -2.33 PRKXP1              |
| 283 | -2.35 SNORD111            |
| 284 | -2.35 SNORD116-24         |
| 285 | -2.35 SNORA80A            |
| 286 | -2.35 NPIP11              |
| 287 | -2.37 RNU6-79P            |
| 288 | -2.37 SNORD60             |
| 289 | -2.41 LOC105379251        |
| 290 | -2.42 AMICA1              |
| 291 | -2.42 SCARNA3             |
| 292 | -2.43 SPRR2F              |
| 293 | -2.44 MIR548AL            |
| 294 | -2.44 TPT1                |
| 295 | -2.44 SCARNA10            |
| 296 | -2.46 SNORD17             |
| 297 | -2.46 SNORA14A            |
| 298 | -2.46 LOC100131541        |
| 299 | -2.48 SNORA57; METTL12    |
| 300 | -2.51 UBE2CP5             |
| 301 | -2.54 SNORA71A            |
| 302 | -2.58 LOC100506123        |
| 303 | -2.58 SLAMF8              |
| 304 | -2.59 SNORA2A             |
| 305 | -2.62 TTN                 |
| 306 | -2.62 ABCG1               |
| 307 | -2.63 TRAJ25              |
| 308 | -2.64 TRAJ1               |
| 309 | -2.64 RBMS3               |
| 310 | -2.72 TRAJ19              |
| 311 | -2.74 SNORA38B            |
| 312 | -2.76 SLC14A1             |
| 313 | -2.78 TRAJ14              |
| 314 | -2.79 MPP7                |

|     |                        |
|-----|------------------------|
| 315 | -2.85 SNORA71D         |
| 316 | -2.87 NUA2             |
| 317 | -2.96 SNORD15B         |
| 318 | -2.98 SCARNA6          |
| 319 | -2.99 PIK3IP1          |
| 320 | -3 SNORA2C; MIR1291    |
| 321 | -3.04 PLCG1            |
| 322 | -3.04 SNORD3D          |
| 323 | -3.18 SNORA54          |
| 324 | -3.3 IGANRP            |
| 325 | -3.32 NELL2            |
| 326 | -3.5 SNORA60           |
| 327 | -3.59 SNORA10; RPS2    |
| 328 | -3.61 MIR1299          |
| 329 | -3.68 MIR1203          |
| 330 | -3.76 SNORA50C; SNHG25 |
| 331 | -4.06 SNORA23          |

**Supplemental Table 2. KEGG Analysis, day 14**

| #pathway ID | Pathway description                          | Observed gene count | False discovery rate | Matching proteins in your network                                 |
|-------------|----------------------------------------------|---------------------|----------------------|-------------------------------------------------------------------|
| 5321        | Inflammatory bowel disease (IBD)             | 8                   | 1.71E-10             | HLA-DQA2,HLA-DRA,IL23R,IL4,IL4R,IL5,JUN,TNF                       |
| 4060        | Cytokine-cytokine receptor interaction       | 11                  | 6.52E-10             | CCL1,CCR7,IL23R,IL4,IL4R,IL5,TNF,TNFRSF1A,TNFRSF1B,TNFRSF4,TNFSF4 |
| 4380        | Osteoclast differentiation                   | 8                   | 1.58E-08             | FOS,FOSL2,JUN,JUNB,JUND,SOCS1,TNF,TNFRSF1A                        |
| 5310        | Asthma                                       | 5                   | 2.20E-07             | HLA-DQA2,HLA-DRA,IL4,IL5,TNF                                      |
| 5140        | Leishmaniasis                                | 6                   | 3.74E-07             | FOS,HLA-DQA2,HLA-DRA,IL4,JUN,TNF                                  |
| 5330        | Allograft rejection                          | 5                   | 4.10E-07             | HLA-DQA2,HLA-DRA,IL4,IL5,TNF                                      |
| 5164        | Influenza A                                  | 7                   | 2.11E-06             | HLA-DQA2,HLA-DRA,HSPA6,JUN,TLR7,TNF,TNFRSF1A                      |
| 4668        | TNF signaling pathway                        | 6                   | 3.14E-06             | FOS,JUN,JUNB,TNF,TNFRSF1A,TNFRSF1B                                |
| 5145        | Toxoplasmosis                                | 6                   | 3.88E-06             | HLA-DQA2,HLA-DRA,HSPA6,SOCS1,TNF,TNFRSF1A                         |
| 4640        | Hematopoietic cell lineage                   | 5                   | 2.24E-05             | HLA-DRA,IL4,IL4R,IL5,TNF                                          |
| 5166        | HTLV-I infection                             | 7                   | 2.24E-05             | EGR1,FOS,HLA-DQA2,HLA-DRA,JUN,TNF,TNFRSF1A                        |
| 5323        | Rheumatoid arthritis                         | 5                   | 2.24E-05             | FOS,HLA-DQA2,HLA-DRA,JUN,TNF                                      |
| 5168        | Herpes simplex infection                     | 6                   | 3.60E-05             | FOS,HLA-DQA2,HLA-DRA,JUN,TNF,TNFRSF1A                             |
| 4660        | T cell receptor signaling pathway            | 5                   | 3.89E-05             | FOS,IL4,IL5,JUN,TNF                                               |
| 4672        | Intestinal immune network for IgA production | 4                   | 4.13E-05             | HLA-DQA2,HLA-DRA,IL4,IL5                                          |
| 5320        | Autoimmune thyroid disease                   | 4                   | 6.00E-05             | HLA-DQA2,HLA-DRA,IL4,IL5                                          |
| 5211        | Renal cell carcinoma                         | 4                   | 0.000166             | ARNT,EGLN3,EPAS1,JUN                                              |
| 4612        | Antigen processing and presentation          | 4                   | 0.000177             | HLA-DQA2,HLA-DRA,HSPA6,TNF                                        |
| 4010        | MAPK signaling pathway                       | 6                   | 0.000202             | FOS,HSPA6,JUN,JUND,TNF,TNFRSF1A                                   |
| 4630        | Jak-STAT signaling pathway                   | 5                   | 0.000248             | IL23R,IL4,IL4R,IL5,SOCS1                                          |
| 5322        | Systemic lupus erythematosus                 | 4                   | 0.000615             | HLA-DQA2,HLA-DRA,SNRPD1,TNF                                       |
| 5142        | Chagas disease (American trypanosomiasis)    | 4                   | 0.000637             | FOS,JUN,TNF,TNFRSF1A                                              |
| 5200        | Pathways in cancer                           | 6                   | 0.000653             | ARNT,EGLN3,EPAS1,FOS,JUN,RUNX1T1                                  |
| 4620        | Toll-like receptor signaling pathway         | 4                   | 0.000684             | FOS,JUN,TLR7,TNF                                                  |
| 5332        | Graft-versus-host disease                    | 3                   | 0.000684             | HLA-DQA2,HLA-DRA,TNF                                              |
| 4940        | Type I diabetes mellitus                     | 3                   | 0.000894             | HLA-DQA2,HLA-DRA,TNF                                              |
| 5014        | Amyotrophic lateral sclerosis (ALS)          | 3                   | 0.00168              | TNF,TNFRSF1A,TNFRSF1B                                             |
| 4664        | Fc epsilon RI signaling pathway              | 3                   | 0.0037               | IL4,IL5,TNF                                                       |
| 4920        | Adipocytokine signaling pathway              | 3                   | 0.00373              | TNF,TNFRSF1A,TNFRSF1B                                             |
| 5133        | Pertussis                                    | 3                   | 0.00394              | FOS,JUN,TNF                                                       |
| 5152        | Tuberculosis                                 | 4                   | 0.00408              | HLA-DQA2,HLA-DRA,TNF,TNFRSF1A                                     |
| 5169        | Epstein-Barr virus infection                 | 4                   | 0.00589              | HLA-DQA2,HLA-DRA,HSPA6,JUN                                        |
| 4915        | Estrogen signaling pathway                   | 3                   | 0.00856              | FOS,HSPA6,JUN                                                     |
| 3040        | Spliceosome                                  | 3                   | 0.019                | HSPA6,SNRPD1,SNRPF                                                |
| 5162        | Measles                                      | 3                   | 0.0206               | HSPA6,IL4,TLR7                                                    |
| 5161        | Hepatitis B                                  | 3                   | 0.0248               | FOS,JUN,TNF                                                       |
| 4932        | Non-alcoholic fatty liver disease (NAFLD)    | 3                   | 0.0282               | JUN,TNF,TNFRSF1A                                                  |
| 4930        | Type II diabetes mellitus                    | 2                   | 0.0305               | SOCS1,TNF                                                         |
| 5010        | Alzheimer s disease                          | 3                   | 0.0354               | BACE2,TNF,TNFRSF1A                                                |
| 5202        | Transcriptional misregulation in cancer      | 3                   | 0.0354               | CCR7,NR4A3,RUNX1T1                                                |
| 5150        | Staphylococcus aureus infection              | 2                   | 0.0361               | HLA-DQA2,HLA-DRA                                                  |
| 5134        | Legionellosis                                | 2                   | 0.038                | HSPA6,TNF                                                         |
| 5416        | Viral myocarditis                            | 2                   | 0.0399               | HLA-DQA2,HLA-DRA                                                  |
| 5210        | Colorectal cancer                            | 2                   | 0.0418               | FOS,JUN                                                           |

**Supplemental Table 2. KEGG Analysis, day 21**

| #pathway ID | Pathway description                          | Observed gene count | False discovery rate | Matching proteins in your network                               |
|-------------|----------------------------------------------|---------------------|----------------------|-----------------------------------------------------------------|
| 4060        | Cytokine-cytokine receptor interaction       | 12                  | 1.83E-08             | CCL3,CRLF2,CSF2,IFNG,IL13,IL17RB,IL1A,IL3RA,IL4,IL5,OSM,TNFSF15 |
| 4630        | Jak-STAT signaling pathway                   | 8                   | 6.99E-06             | CRLF2,CSF2,IFNG,IL13,IL3RA,IL4,IL5,OSM                          |
| 4110        | Cell cycle                                   | 6                   | 0.000192             | CCNA1,CCNA2,CCNB1,CCNB2,CDC20,CDC45                             |
| 4664        | Fc epsilon RI signaling pathway              | 5                   | 0.000192             | CSF2,IL13,IL4,IL5,PLCG1                                         |
| 5321        | Inflammatory bowel disease (IBD)             | 5                   | 0.000192             | IFNG,IL13,IL1A,IL4,IL5                                          |
| 5330        | Allograft rejection                          | 4                   | 0.000244             | CD86,IFNG,IL4,IL5                                               |
| 4640        | Hematopoietic cell lineage                   | 5                   | 0.00036              | CSF2,IL1A,IL3RA,IL4,IL5                                         |
| 5323        | Rheumatoid arthritis                         | 5                   | 0.00036              | CCL3,CD86,CSF2,IFNG,IL1A                                        |
| 4660        | T cell receptor signaling pathway            | 5                   | 0.00064              | CSF2,IFNG,IL4,IL5,PLCG1                                         |
| 5162        | Measles                                      | 5                   | 0.00215              | IFNG,IL13,IL1A,IL4,TP73                                         |
| 5140        | Leishmaniasis                                | 4                   | 0.00227              | IFNG,IL1A,IL4,PTGS2                                             |
| 5310        | Asthma                                       | 3                   | 0.00271              | IL13,IL4,IL5                                                    |
| 4914        | Progesterone-mediated oocyte maturation      | 4                   | 0.00325              | CCNA1,CCNA2,CCNB1,CCNB2                                         |
| 5132        | Salmonella infection                         | 4                   | 0.00332              | CCL3,CSF2,IFNG,IL1A                                             |
| 5332        | Graft-versus-host disease                    | 3                   | 0.00463              | CD86,IFNG,IL1A                                                  |
| 5322        | Systemic lupus erythematosus                 | 4                   | 0.00516              | CD86,HIST1H2AJ,HIST1H2BM,IFNG                                   |
| 4940        | Type I diabetes mellitus                     | 3                   | 0.0056               | CD86,IFNG,IL1A                                                  |
| 4114        | Oocyte meiosis                               | 4                   | 0.00665              | CCNB1,CCNB2,CDC20,SGOL1                                         |
| 4672        | Intestinal immune network for IgA production | 3                   | 0.00665              | CD86,IL4,IL5                                                    |
| 5320        | Autoimmune thyroid disease                   | 3                   | 0.00869              | CD86,IL4,IL5                                                    |
| 4115        | p53 signaling pathway                        | 3                   | 0.0197               | CCNB1,CCNB2,TP73                                                |
| 5202        | Transcriptional misregulation in cancer      | 4                   | 0.03                 | CCNA1,CD86,CSF2,DUSP6                                           |
| 5203        | Viral carcinogenesis                         | 4                   | 0.0409               | CCNA1,CCNA2,CDC20,HIST1H2BM                                     |
| 5169        | Epstein-Barr virus infection                 | 4                   | 0.0457               | CCNA1,CCNA2,IFNG,PLCG1                                          |

Supplemental Table 3. Gene Ontogeny Analysis, day 14

| #pathway ID | Pathway description                                                                | Observed gene count | False discovery rate |
|-------------|------------------------------------------------------------------------------------|---------------------|----------------------|
| GO.0034097  | response to cytokine                                                               | 14                  | 8.87E-08             |
| GO.0051707  | response to other organism                                                         | 14                  | 8.87E-08             |
| GO.1903708  | positive regulation of hemopoiesis                                                 | 9                   | 9.32E-08             |
| GO.1902107  | positive regulation of leukocyte differentiation                                   | 8                   | 4.32E-07             |
| GO.0033993  | response to lipid                                                                  | 13                  | 3.61E-06             |
| GO.0032496  | response to lipopolysaccharide                                                     | 9                   | 5.37E-06             |
| GO.0002639  | positive regulation of immunoglobulin production                                   | 5                   | 5.66E-06             |
| GO.0006954  | inflammatory response                                                              | 10                  | 1.01E-05             |
| GO.0031347  | regulation of defense response                                                     | 12                  | 1.19E-05             |
| GO.0009617  | response to bacterium                                                              | 10                  | 1.44E-05             |
| GO.0045639  | positive regulation of myeloid cell differentiation                                | 6                   | 1.44E-05             |
| GO.0051239  | regulation of multicellular organismal process                                     | 19                  | 1.44E-05             |
| GO.0009893  | positive regulation of metabolic process                                           | 22                  | 3.44E-05             |
| GO.0042127  | regulation of cell proliferation                                                   | 15                  | 3.44E-05             |
| GO.0019221  | cytokine-mediated signaling pathway                                                | 9                   | 3.62E-05             |
| GO.0002763  | positive regulation of myeloid leukocyte differentiation                           | 5                   | 5.25E-05             |
| GO.0046636  | negative regulation of alpha-beta T cell activation                                | 4                   | 5.25E-05             |
| GO.0006955  | immune response                                                                    | 14                  | 5.39E-05             |
| GO.0045637  | regulation of myeloid cell differentiation                                         | 7                   | 5.79E-05             |
| GO.0002761  | regulation of myeloid leukocyte differentiation                                    | 6                   | 6.62E-05             |
| GO.0046634  | regulation of alpha-beta T cell activation                                         | 5                   | 7.88E-05             |
| GO.1903530  | regulation of secretion by cell                                                    | 10                  | 9.38E-05             |
| GO.1903706  | regulation of hemopoiesis                                                          | 8                   | 9.38E-05             |
| GO.0045622  | regulation of T-helper cell differentiation                                        | 4                   | 9.86E-05             |
| GO.0031325  | positive regulation of cellular metabolic process                                  | 19                  | 0.000115             |
| GO.0002376  | immune system process                                                              | 16                  | 0.000143             |
| GO.0071241  | cellular response to inorganic substance                                           | 6                   | 0.000143             |
| GO.0070887  | cellular response to chemical stimulus                                             | 17                  | 0.000156             |
| GO.1902105  | regulation of leukocyte differentiation                                            | 7                   | 0.000156             |
| GO.0002699  | positive regulation of immune effector process                                     | 6                   | 0.00017              |
| GO.0010534  | regulation of activation of JAK2 kinase activity                                   | 3                   | 0.000175             |
| GO.0010604  | positive regulation of macromolecule metabolic process                             | 18                  | 0.000185             |
| GO.0001817  | regulation of cytokine production                                                  | 9                   | 0.000211             |
| GO.0045623  | negative regulation of T-helper cell differentiation                               | 3                   | 0.000211             |
| GO.0050727  | regulation of inflammatory response                                                | 7                   | 0.000211             |
| GO.0051024  | positive regulation of immunoglobulin secretion                                    | 3                   | 0.000211             |
| GO.0061418  | regulation of transcription from RNA polymerase II promoter in response to hypoxia | 4                   | 0.000211             |
| GO.0071345  | cellular response to cytokine stimulus                                             | 9                   | 0.000211             |
| GO.0071310  | cellular response to organic substance                                             | 15                  | 0.000238             |
| GO.0009605  | response to external stimulus                                                      | 15                  | 0.00027              |
| GO.0048518  | positive regulation of biological process                                          | 24                  | 0.000333             |
| GO.0001774  | microglial cell activation                                                         | 3                   | 0.000354             |
| GO.0046425  | regulation of JAK-STAT cascade                                                     | 5                   | 0.000354             |
| GO.0010035  | response to inorganic substance                                                    | 8                   | 0.000384             |
| GO.0051716  | cellular response to stimulus                                                      | 26                  | 0.000384             |
| GO.0060341  | regulation of cellular localization                                                | 12                  | 0.000394             |
| GO.0051591  | response to cAMP                                                                   | 5                   | 0.000436             |
| GO.0071277  | cellular response to calcium ion                                                   | 4                   | 0.000481             |
| GO.0009612  | response to mechanical stimulus                                                    | 6                   | 0.000595             |
| GO.0051249  | regulation of lymphocyte activation                                                | 7                   | 0.000868             |
| GO.0071248  | cellular response to metal ion                                                     | 5                   | 0.000872             |
| GO.2000525  | positive regulation of T cell costimulation                                        | 2                   | 0.000875             |
| GO.0042510  | regulation of tyrosine phosphorylation of Stat1 protein                            | 3                   | 0.00095              |
| GO.0042110  | T cell activation                                                                  | 6                   | 0.000952             |
| GO.0051251  | positive regulation of lymphocyte activation                                       | 6                   | 0.000952             |
| GO.0032101  | regulation of response to external stimulus                                        | 10                  | 0.000968             |
| GO.0030888  | regulation of B cell proliferation                                                 | 4                   | 0.000981             |
| GO.0001819  | positive regulation of cytokine production                                         | 7                   | 0.00105              |
| GO.0051240  | positive regulation of multicellular organismal process                            | 12                  | 0.00105              |
| GO.0007165  | signal transduction                                                                | 22                  | 0.00106              |
| GO.0010557  | positive regulation of macromolecule biosynthetic process                          | 13                  | 0.00106              |
| GO.0043618  | regulation of transcription from RNA polymerase II promoter in response to stress  | 4                   | 0.00106              |
| GO.0050707  | regulation of cytokine secretion                                                   | 5                   | 0.00106              |
| GO.0045624  | positive regulation of T-helper cell differentiation                               | 3                   | 0.00113              |
| GO.0048584  | positive regulation of response to stimulus                                        | 14                  | 0.00113              |
| GO.0051090  | regulation of sequence-specific DNA binding transcription factor activity          | 7                   | 0.00113              |
| GO.0051704  | multi-organism process                                                             | 15                  | 0.00121              |



|            |                                                                                                    |    |         |
|------------|----------------------------------------------------------------------------------------------------|----|---------|
| GO.0032103 | positive regulation of response to external stimulus                                               | 7  | 0.00123 |
| GO.0050708 | regulation of protein secretion                                                                    | 7  | 0.0013  |
| GO.0006952 | defense response                                                                                   | 12 | 0.00132 |
| GO.0045935 | positive regulation of nucleobase-containing compound metabolic process                            | 13 | 0.00132 |
| GO.0002825 | regulation of T-helper 1 type immune response                                                      | 3  | 0.00134 |
| GO.0045893 | positive regulation of transcription, DNA-templated                                                | 12 | 0.00134 |
| GO.0048522 | positive regulation of cellular process                                                            | 21 | 0.00134 |
| GO.0080134 | regulation of response to stress                                                                   | 12 | 0.00134 |
| GO.0045582 | positive regulation of T cell differentiation                                                      | 4  | 0.00142 |
| GO.0046427 | positive regulation of JAK-STAT cascade                                                            | 4  | 0.00142 |
| GO.0045321 | leukocyte activation                                                                               | 7  | 0.00145 |
| GO.0001562 | response to protozoan                                                                              | 3  | 0.00147 |
| GO.0002697 | regulation of immune effector process                                                              | 7  | 0.00152 |
| GO.0031328 | positive regulation of cellular biosynthetic process                                               | 13 | 0.00157 |
| GO.0048534 | hematopoietic or lymphoid organ development                                                        | 8  | 0.00157 |
| GO.0045626 | negative regulation of T-helper 1 cell differentiation                                             | 2  | 0.00159 |
| GO.0048583 | regulation of response to stimulus                                                                 | 18 | 0.0017  |
| GO.0042104 | positive regulation of activated T cell proliferation                                              | 3  | 0.00175 |
| GO.0002520 | immune system development                                                                          | 8  | 0.00193 |
| GO.0007166 | cell surface receptor signaling pathway                                                            | 14 | 0.00193 |
| GO.0042493 | response to drug                                                                                   | 7  | 0.00193 |
| GO.0044700 | single organism signaling                                                                          | 22 | 0.00203 |
| GO.0014070 | response to organic cyclic compound                                                                | 9  | 0.00207 |
| GO.0008284 | positive regulation of cell proliferation                                                          | 9  | 0.00209 |
| GO.0042325 | regulation of phosphorylation                                                                      | 11 | 0.00216 |
| GO.0045597 | positive regulation of cell differentiation                                                        | 9  | 0.00216 |
| GO.0002521 | leukocyte differentiation                                                                          | 6  | 0.0022  |
| GO.0006950 | response to stress                                                                                 | 18 | 0.0022  |
| GO.0051246 | regulation of protein metabolic process                                                            | 15 | 0.00234 |
| GO.0002684 | positive regulation of immune system process                                                       | 9  | 0.00236 |
| GO.0050670 | regulation of lymphocyte proliferation                                                             | 5  | 0.0025  |
| GO.0032649 | regulation of interferon-gamma production                                                          | 4  | 0.00253 |
| GO.0048295 | positive regulation of isotype switching to IgE isotypes                                           | 2  | 0.00253 |
| GO.0048519 | negative regulation of biological process                                                          | 20 | 0.00253 |
| GO.1903532 | positive regulation of secretion by cell                                                           | 6  | 0.00253 |
| GO.2000416 | regulation of eosinophil migration                                                                 | 2  | 0.00253 |
| GO.0007154 | cell communication                                                                                 | 22 | 0.00254 |
| GO.0010033 | response to organic substance                                                                      | 15 | 0.00259 |
| GO.0010647 | positive regulation of cell communication                                                          | 12 | 0.0026  |
| GO.0002823 | negative regulation of adaptive immune response based on somatic recombination of immune receptors | 3  | 0.00274 |
| GO.0031399 | regulation of protein modification process                                                         | 12 | 0.00274 |
| GO.0032735 | positive regulation of interleukin-12 production                                                   | 3  | 0.00274 |
| GO.0043304 | regulation of mast cell degranulation                                                              | 3  | 0.00274 |
| GO.0050729 | positive regulation of inflammatory response                                                       | 4  | 0.00282 |
| GO.0002698 | negative regulation of immune effector process                                                     | 4  | 0.00305 |
| GO.0002682 | regulation of immune system process                                                                | 11 | 0.0032  |
| GO.0001892 | embryonic placenta development                                                                     | 4  | 0.00326 |
| GO.0051094 | positive regulation of developmental process                                                       | 10 | 0.00326 |
| GO.0033209 | tumor necrosis factor-mediated signaling pathway                                                   | 3  | 0.0035  |
| GO.0050728 | negative regulation of inflammatory response                                                       | 4  | 0.0035  |
| GO.0051247 | positive regulation of protein metabolic process                                                   | 11 | 0.00391 |
| GO.0030099 | myeloid cell differentiation                                                                       | 5  | 0.00399 |
| GO.0032268 | regulation of cellular protein metabolic process                                                   | 14 | 0.004   |
| GO.0050864 | regulation of B cell activation                                                                    | 4  | 0.00442 |
| GO.0006979 | response to oxidative stress                                                                       | 6  | 0.00463 |
| GO.0030890 | positive regulation of B cell proliferation                                                        | 3  | 0.00464 |
| GO.0032653 | regulation of interleukin-10 production                                                            | 3  | 0.00464 |
| GO.0030097 | hemopoiesis                                                                                        | 7  | 0.00474 |
| GO.0001932 | regulation of protein phosphorylation                                                              | 10 | 0.00483 |
| GO.0043382 | positive regulation of memory T cell differentiation                                               | 2  | 0.00483 |
| GO.0051133 | regulation of NK T cell activation                                                                 | 2  | 0.00483 |
| GO.2000319 | regulation of T-helper 17 cell differentiation                                                     | 2  | 0.00483 |
| GO.0050730 | regulation of peptidyl-tyrosine phosphorylation                                                    | 5  | 0.00484 |
| GO.0098542 | defense response to other organism                                                                 | 6  | 0.00492 |
| GO.0050671 | positive regulation of lymphocyte proliferation                                                    | 4  | 0.00493 |
| GO.0051049 | regulation of transport                                                                            | 12 | 0.005   |
| GO.0051223 | regulation of protein transport                                                                    | 8  | 0.00543 |
| GO.0050777 | negative regulation of immune response                                                             | 4  | 0.00559 |
| GO.0001816 | cytokine production                                                                                | 4  | 0.00609 |
| GO.0032870 | cellular response to hormone stimulus                                                              | 7  | 0.00613 |

|            |                                                                                               |    |         |
|------------|-----------------------------------------------------------------------------------------------|----|---------|
| GO.0031349 | positive regulation of defense response                                                       | 6  | 0.0062  |
| GO.0032722 | positive regulation of chemokine production                                                   | 3  | 0.00647 |
| GO.0071456 | cellular response to hypoxia                                                                  | 4  | 0.0065  |
| GO.0045944 | positive regulation of transcription from RNA polymerase II promoter                          | 9  | 0.00722 |
| GO.0030217 | T cell differentiation                                                                        | 4  | 0.00768 |
| GO.0043619 | regulation of transcription from RNA polymerase II promoter in response to oxidative stress   | 2  | 0.00776 |
| GO.0045630 | positive regulation of T-helper 2 cell differentiation                                        | 2  | 0.00776 |
| GO.2000113 | negative regulation of cellular macromolecule biosynthetic process                            | 10 | 0.00799 |
| GO.0050776 | regulation of immune response                                                                 | 8  | 0.00887 |
| GO.0048545 | response to steroid hormone                                                                   | 6  | 0.00889 |
| GO.0010646 | regulation of cell communication                                                              | 15 | 0.00901 |
| GO.0048585 | negative regulation of response to stimulus                                                   | 10 | 0.00952 |
| GO.0045934 | negative regulation of nucleobase-containing compound metabolic process                       | 10 | 0.00972 |
| GO.1901654 | response to ketone                                                                            | 4  | 0.00997 |
| GO.0046631 | alpha-beta T cell activation                                                                  | 3  | 0.0102  |
| GO.0010605 | negative regulation of macromolecule metabolic process                                        | 13 | 0.0104  |
| GO.0002703 | regulation of leukocyte mediated immunity                                                     | 4  | 0.0109  |
| GO.0031324 | negative regulation of cellular metabolic process                                             | 13 | 0.011   |
| GO.0032729 | positive regulation of interferon-gamma production                                            | 3  | 0.0111  |
| GO.0042531 | positive regulation of tyrosine phosphorylation of STAT protein                               | 3  | 0.0111  |
| GO.0032736 | positive regulation of interleukin-13 production                                              | 2  | 0.0113  |
| GO.0035914 | skeletal muscle cell differentiation                                                          | 3  | 0.0115  |
| GO.0048568 | embryonic organ development                                                                   | 6  | 0.0128  |
| GO.0001890 | placenta development                                                                          | 4  | 0.0131  |
| GO.0009628 | response to abiotic stimulus                                                                  | 9  | 0.0133  |
| GO.0045892 | negative regulation of transcription, DNA-templated                                           | 9  | 0.0142  |
| GO.0002824 | positive regulation of adaptive immune response based on somatic recombination of immune rece | 3  | 0.0151  |
| GO.0017157 | regulation of exocytosis                                                                      | 4  | 0.0151  |
| GO.0045670 | regulation of osteoclast differentiation                                                      | 3  | 0.0151  |
| GO.0030854 | positive regulation of granulocyte differentiation                                            | 2  | 0.0153  |
| GO.0050871 | positive regulation of B cell activation                                                      | 3  | 0.0154  |
| GO.0071496 | cellular response to external stimulus                                                        | 5  | 0.0154  |
| GO.0050731 | positive regulation of peptidyl-tyrosine phosphorylation                                      | 4  | 0.0155  |
| GO.0002708 | positive regulation of lymphocyte mediated immunity                                           | 3  | 0.016   |
| GO.0023056 | positive regulation of signaling                                                              | 10 | 0.0172  |
| GO.0009966 | regulation of signal transduction                                                             | 13 | 0.0187  |
| GO.0045595 | regulation of cell differentiation                                                            | 10 | 0.0196  |
| GO.0043306 | positive regulation of mast cell degranulation                                                | 2  | 0.0199  |
| GO.0045921 | positive regulation of exocytosis                                                             | 3  | 0.0202  |
| GO.0034162 | toll-like receptor 9 signaling pathway                                                        | 3  | 0.0224  |
| GO.0046649 | lymphocyte activation                                                                         | 5  | 0.0224  |
| GO.0048523 | negative regulation of cellular process                                                       | 17 | 0.0224  |
| GO.0071260 | cellular response to mechanical stimulus                                                      | 3  | 0.0224  |
| GO.0000302 | response to reactive oxygen species                                                           | 4  | 0.0225  |
| GO.0008630 | intrinsic apoptotic signaling pathway in response to DNA damage                               | 3  | 0.0232  |
| GO.0051241 | negative regulation of multicellular organismal process                                       | 8  | 0.0239  |
| GO.0071560 | cellular response to transforming growth factor beta stimulus                                 | 4  | 0.0243  |
| GO.0050714 | positive regulation of protein secretion                                                      | 4  | 0.0247  |
| GO.2000026 | regulation of multicellular organismal development                                            | 10 | 0.0254  |
| GO.0001829 | trophoblast cell differentiation                                                              | 2  | 0.0274  |
| GO.0002705 | positive regulation of leukocyte mediated immunity                                            | 3  | 0.0274  |
| GO.0042523 | positive regulation of tyrosine phosphorylation of Stat5 protein                              | 2  | 0.0274  |
| GO.0097190 | apoptotic signaling pathway                                                                   | 5  | 0.0274  |
| GO.1901741 | positive regulation of myoblast fusion                                                        | 2  | 0.0274  |
| GO.0043523 | regulation of neuron apoptotic process                                                        | 4  | 0.0282  |
| GO.0002755 | MyD88-dependent toll-like receptor signaling pathway                                          | 3  | 0.0299  |
| GO.0048145 | regulation of fibroblast proliferation                                                        | 3  | 0.0299  |
| GO.0033233 | regulation of protein sumoylation                                                             | 2  | 0.03    |
| GO.0042832 | defense response to protozoan                                                                 | 2  | 0.03    |
| GO.1902106 | negative regulation of leukocyte differentiation                                              | 3  | 0.0305  |
| GO.0032270 | positive regulation of cellular protein metabolic process                                     | 9  | 0.0318  |
| GO.0050778 | positive regulation of immune response                                                        | 6  | 0.0324  |
| GO.0009967 | positive regulation of signal transduction                                                    | 9  | 0.0325  |
| GO.0002076 | osteoblast development                                                                        | 2  | 0.0328  |
| GO.0035994 | response to muscle stretch                                                                    | 2  | 0.0328  |
| GO.0019222 | regulation of metabolic process                                                               | 22 | 0.036   |
| GO.0033554 | cellular response to stress                                                                   | 10 | 0.0374  |
| GO.0032660 | regulation of interleukin-17 production                                                       | 2  | 0.0392  |
| GO.0042326 | negative regulation of phosphorylation                                                        | 5  | 0.0398  |
| GO.0002293 | alpha-beta T cell differentiation involved in immune response                                 | 2  | 0.0421  |

|            |                                                                          |    |        |
|------------|--------------------------------------------------------------------------|----|--------|
| GO.0045672 | positive regulation of osteoclast differentiation                        | 2  | 0.0421 |
| GO.0071356 | cellular response to tumor necrosis factor                               | 3  | 0.0425 |
| GO.0002573 | myeloid leukocyte differentiation                                        | 3  | 0.0433 |
| GO.0006357 | regulation of transcription from RNA polymerase II promoter              | 10 | 0.0433 |
| GO.0007178 | transmembrane receptor protein serine/threonine kinase signaling pathway | 4  | 0.0433 |
| GO.0032733 | positive regulation of interleukin-10 production                         | 2  | 0.0444 |
| GO.0065009 | regulation of molecular function                                         | 13 | 0.0444 |
| GO.0071624 | positive regulation of granulocyte chemotaxis                            | 2  | 0.0444 |
| GO.0044708 | single-organism behavior                                                 | 5  | 0.0451 |
| GO.0031327 | negative regulation of cellular biosynthetic process                     | 9  | 0.0476 |
| GO.0034695 | response to prostaglandin E                                              | 2  | 0.0476 |
| GO.0043030 | regulation of macrophage activation                                      | 2  | 0.0476 |
| GO.0031323 | regulation of cellular metabolic process                                 | 20 | 0.0485 |

**Supplemental Table 3. Gene Ontogeny Analysis, day 21**

| <b>#pathway ID</b> | <b>Pathway description</b>                                       | <b>Observed gene count</b> | <b>False discovery rate</b> |
|--------------------|------------------------------------------------------------------|----------------------------|-----------------------------|
| GO.0000278         | mitotic cell cycle                                               | 67                         | 2.00E-34                    |
| GO.1903047         | mitotic cell cycle process                                       | 57                         | 1.46E-27                    |
| GO.0007049         | cell cycle                                                       | 72                         | 7.91E-27                    |
| GO.0022402         | cell cycle process                                               | 62                         | 1.12E-24                    |
| GO.0007067         | mitotic nuclear division                                         | 39                         | 6.56E-24                    |
| GO.0051301         | cell division                                                    | 42                         | 8.18E-22                    |
| GO.0000280         | nuclear division                                                 | 40                         | 1.50E-21                    |
| GO.0048285         | organelle fission                                                | 41                         | 1.50E-21                    |
| GO.0007059         | chromosome segregation                                           | 27                         | 1.62E-18                    |
| GO.0051726         | regulation of cell cycle                                         | 45                         | 2.17E-13                    |
| GO.0000070         | mitotic sister chromatid segregation                             | 16                         | 2.97E-13                    |
| GO.0010564         | regulation of cell cycle process                                 | 34                         | 3.07E-13                    |
| GO.0044772         | mitotic cell cycle phase transition                              | 27                         | 6.28E-13                    |
| GO.0098813         | nuclear chromosome segregation                                   | 18                         | 3.39E-12                    |
| GO.0006259         | DNA metabolic process                                            | 36                         | 1.81E-11                    |
| GO.0051983         | regulation of chromosome segregation                             | 14                         | 2.19E-11                    |
| GO.0006260         | DNA replication                                                  | 21                         | 2.64E-11                    |
| GO.0071103         | DNA conformation change                                          | 21                         | 5.04E-11                    |
| GO.0006996         | organelle organization                                           | 75                         | 1.07E-10                    |
| GO.1902589         | single-organism organelle organization                           | 60                         | 1.38E-10                    |
| GO.0000083         | regulation of transcription involved in G1/S transition of mitot | 10                         | 1.54E-10                    |
| GO.1901990         | regulation of mitotic cell cycle phase transition                | 21                         | 1.11E-09                    |
| GO.0051302         | regulation of cell division                                      | 21                         | 1.71E-09                    |
| GO.0006323         | DNA packaging                                                    | 17                         | 1.86E-09                    |
| GO.0051276         | chromosome organization                                          | 37                         | 1.86E-09                    |
| GO.0000075         | cell cycle checkpoint                                            | 19                         | 8.42E-09                    |
| GO.0007346         | regulation of mitotic cell cycle                                 | 26                         | 1.09E-08                    |
| GO.0000082         | G1/S transition of mitotic cell cycle                            | 17                         | 1.13E-08                    |
| GO.0006261         | DNA-dependent DNA replication                                    | 13                         | 1.13E-08                    |
| GO.0007264         | small GTPase mediated signal transduction                        | 31                         | 1.14E-08                    |
| GO.0051716         | cellular response to stimulus                                    | 111                        | 2.23E-08                    |
| GO.0035556         | intracellular signal transduction                                | 53                         | 2.27E-08                    |
| GO.0044763         | single-organism cellular process                                 | 156                        | 7.38E-08                    |
| GO.0007088         | regulation of mitotic nuclear division                           | 14                         | 8.91E-08                    |
| GO.0016043         | cellular component organization                                  | 94                         | 9.74E-08                    |
| GO.0051783         | regulation of nuclear division                                   | 15                         | 9.74E-08                    |
| GO.0045787         | positive regulation of cell cycle                                | 20                         | 2.15E-07                    |
| GO.0090068         | positive regulation of cell cycle process                        | 18                         | 2.40E-07                    |
| GO.0006270         | DNA replication initiation                                       | 8                          | 2.43E-07                    |
| GO.0045931         | positive regulation of mitotic cell cycle                        | 13                         | 2.62E-07                    |
| GO.0010948         | negative regulation of cell cycle process                        | 17                         | 8.17E-07                    |
| GO.0051781         | positive regulation of cell division                             | 13                         | 1.33E-06                    |
| GO.0006281         | DNA repair                                                       | 22                         | 1.35E-06                    |
| GO.0006334         | nucleosome assembly                                              | 12                         | 1.75E-06                    |
| GO.0065004         | protein-DNA complex assembly                                     | 13                         | 1.83E-06                    |
| GO.0051782         | negative regulation of cell division                             | 10                         | 3.24E-06                    |
| GO.1901992         | positive regulation of mitotic cell cycle phase transition       | 9                          | 3.61E-06                    |
| GO.0000727         | double-strand break repair via break-induced replication         | 4                          | 5.49E-06                    |
| GO.0031497         | chromatin assembly                                               | 12                         | 5.84E-06                    |

|            |                                                                  |     |          |
|------------|------------------------------------------------------------------|-----|----------|
| GO.0050789 | regulation of biological process                                 | 142 | 9.56E-06 |
| GO.0007052 | mitotic spindle organization                                     | 8   | 1.01E-05 |
| GO.0000910 | cytokinesis                                                      | 10  | 1.20E-05 |
| GO.0045786 | negative regulation of cell cycle                                | 21  | 1.36E-05 |
| GO.0002376 | immune system process                                            | 49  | 1.37E-05 |
| GO.0030071 | regulation of mitotic metaphase/anaphase transition              | 8   | 1.37E-05 |
| GO.0044699 | single-organism process                                          | 153 | 2.06E-05 |
| GO.0050794 | regulation of cellular process                                   | 137 | 2.06E-05 |
| GO.0006461 | protein complex assembly                                         | 31  | 2.45E-05 |
| GO.0070271 | protein complex biogenesis                                       | 31  | 2.45E-05 |
| GO.0000086 | G2/M transition of mitotic cell cycle                            | 12  | 2.76E-05 |
| GO.0022616 | DNA strand elongation                                            | 7   | 2.76E-05 |
| GO.0071822 | protein complex subunit organization                             | 39  | 2.98E-05 |
| GO.0006336 | DNA replication-independent nucleosome assembly                  | 8   | 4.24E-05 |
| GO.0034622 | cellular macromolecular complex assembly                         | 23  | 5.51E-05 |
| GO.0000226 | microtubule cytoskeleton organization                            | 17  | 5.66E-05 |
| GO.0042127 | regulation of cell proliferation                                 | 39  | 5.86E-05 |
| GO.1902850 | microtubule cytoskeleton organization involved in mitosis        | 6   | 5.86E-05 |
| GO.0001932 | regulation of protein phosphorylation                            | 34  | 6.07E-05 |
| GO.0006950 | response to stress                                               | 68  | 6.07E-05 |
| GO.0031577 | spindle checkpoint                                               | 7   | 6.57E-05 |
| GO.0051784 | negative regulation of nuclear division                          | 8   | 6.85E-05 |
| GO.0000076 | DNA replication checkpoint                                       | 5   | 7.56E-05 |
| GO.0006955 | immune response                                                  | 36  | 7.94E-05 |
| GO.0042325 | regulation of phosphorylation                                    | 35  | 9.93E-05 |
| GO.0007051 | spindle organization                                             | 9   | 0.000101 |
| GO.0010965 | regulation of mitotic sister chromatid separation                | 7   | 0.000101 |
| GO.0023052 | signaling                                                        | 87  | 0.000101 |
| GO.0034080 | CENP-A containing nucleosome assembly                            | 7   | 0.000101 |
| GO.0061641 | CENP-A containing chromatin organization                         | 7   | 0.000101 |
| GO.0051984 | positive regulation of chromosome segregation                    | 5   | 0.000103 |
| GO.0065007 | biological regulation                                            | 141 | 0.00012  |
| GO.0007017 | microtubule-based process                                        | 20  | 0.000122 |
| GO.0032434 | regulation of proteasomal ubiquitin-dependent protein catabolism | 11  | 0.000122 |
| GO.0045840 | positive regulation of mitotic nuclear division                  | 7   | 0.000128 |
| GO.1990267 | response to transition metal nanoparticle                        | 10  | 0.000128 |
| GO.0006974 | cellular response to DNA damage stimulus                         | 24  | 0.000153 |
| GO.0044700 | single organism signaling                                        | 86  | 0.000167 |
| GO.0048523 | negative regulation of cellular process                          | 73  | 0.000167 |
| GO.0051303 | establishment of chromosome localization                         | 7   | 0.000167 |
| GO.0007165 | signal transduction                                              | 82  | 0.000173 |
| GO.0048519 | negative regulation of biological process                        | 77  | 0.000173 |
| GO.0051128 | regulation of cellular component organization                    | 48  | 0.000201 |
| GO.0002274 | myeloid leukocyte activation                                     | 9   | 0.000204 |
| GO.0051246 | regulation of protein metabolic process                          | 52  | 0.000214 |
| GO.0042493 | response to drug                                                 | 18  | 0.000222 |
| GO.0010389 | regulation of G2/M transition of mitotic cell cycle              | 7   | 0.000242 |
| GO.0006271 | DNA strand elongation involved in DNA replication                | 6   | 0.000254 |
| GO.0000003 | reproduction                                                     | 28  | 0.000266 |
| GO.0045930 | negative regulation of mitotic cell cycle                        | 13  | 0.0003   |
| GO.0050896 | response to stimulus                                             | 108 | 0.000313 |
| GO.0065003 | macromolecular complex assembly                                  | 32  | 0.000313 |

|            |                                                                  |    |          |
|------------|------------------------------------------------------------------|----|----------|
| GO.1901991 | negative regulation of mitotic cell cycle phase transition       | 11 | 0.000356 |
| GO.0006310 | DNA recombination                                                | 12 | 0.000358 |
| GO.0034097 | response to cytokine                                             | 22 | 0.000358 |
| GO.0007154 | cell communication                                               | 86 | 0.000361 |
| GO.0090307 | mitotic spindle assembly                                         | 5  | 0.000374 |
| GO.0060326 | cell chemotaxis                                                  | 11 | 0.000388 |
| GO.0061640 | cytoskeleton-dependent cytokinesis                               | 6  | 0.000395 |
| GO.0009636 | response to toxic substance                                      | 11 | 0.000406 |
| GO.0006302 | double-strand break repair                                       | 10 | 0.000492 |
| GO.0007093 | mitotic cell cycle checkpoint                                    | 11 | 0.000501 |
| GO.0016477 | cell migration                                                   | 24 | 0.000501 |
| GO.0097305 | response to alcohol                                              | 15 | 0.000501 |
| GO.0051985 | negative regulation of chromosome segregation                    | 6  | 0.00053  |
| GO.0008285 | negative regulation of cell proliferation                        | 22 | 0.00055  |
| GO.0031399 | regulation of protein modification process                       | 38 | 0.00055  |
| GO.0034341 | response to interferon-gamma                                     | 9  | 0.00055  |
| GO.0033044 | regulation of chromosome organization                            | 12 | 0.000574 |
| GO.0002449 | lymphocyte mediated immunity                                     | 9  | 0.000578 |
| GO.0007010 | cytoskeleton organization                                        | 25 | 0.000581 |
| GO.0006952 | defense response                                                 | 35 | 0.000592 |
| GO.0031145 | anaphase-promoting complex-dependent proteasomal ubiqui          | 8  | 0.000607 |
| GO.0051988 | regulation of attachment of spindle microtubules to kinetocho    | 4  | 0.000628 |
| GO.1903050 | regulation of proteolysis involved in cellular protein catabolic | 14 | 0.00072  |
| GO.0051338 | regulation of transferase activity                               | 26 | 0.000758 |
| GO.0002443 | leukocyte mediated immunity                                      | 10 | 0.000829 |
| GO.0051297 | centrosome organization                                          | 7  | 0.000829 |
| GO.0007076 | mitotic chromosome condensation                                  | 4  | 0.000901 |
| GO.0019220 | regulation of phosphate metabolic process                        | 36 | 0.000987 |
| GO.0030261 | chromosome condensation                                          | 5  | 0.001    |
| GO.0032465 | regulation of cytokinesis                                        | 7  | 0.001    |
| GO.0006928 | movement of cell or subcellular component                        | 33 | 0.00101  |
| GO.0009411 | response to UV                                                   | 9  | 0.00101  |
| GO.0051321 | meiotic cell cycle                                               | 10 | 0.00114  |
| GO.0008608 | attachment of spindle microtubules to kinetochore                | 4  | 0.00119  |
| GO.0031570 | DNA integrity checkpoint                                         | 10 | 0.00119  |
| GO.0046427 | positive regulation of JAK-STAT cascade                          | 7  | 0.00119  |
| GO.0061136 | regulation of proteasomal protein catabolic process              | 12 | 0.00119  |
| GO.0032268 | regulation of cellular protein metabolic process                 | 47 | 0.00131  |
| GO.0000281 | mitotic cytokinesis                                              | 5  | 0.00138  |
| GO.0010165 | response to X-ray                                                | 5  | 0.00138  |
| GO.0050731 | positive regulation of peptidyl-tyrosine phosphorylation         | 10 | 0.00143  |
| GO.0030162 | regulation of proteolysis                                        | 23 | 0.00146  |
| GO.0034508 | centromere complex assembly                                      | 6  | 0.00153  |
| GO.0045839 | negative regulation of mitotic nuclear division                  | 6  | 0.00153  |
| GO.0007096 | regulation of exit from mitosis                                  | 4  | 0.00155  |
| GO.0043306 | positive regulation of mast cell degranulation                   | 4  | 0.00155  |
| GO.0051674 | localization of cell                                             | 24 | 0.00159  |
| GO.0032776 | DNA methylation on cytosine                                      | 5  | 0.00187  |
| GO.0040011 | locomotion                                                       | 30 | 0.00194  |
| GO.1902531 | regulation of intracellular signal transduction                  | 33 | 0.00217  |
| GO.0000724 | double-strand break repair via homologous recombination          | 7  | 0.00226  |
| GO.0010212 | response to ionizing radiation                                   | 9  | 0.00232  |

|            |                                                                   |    |         |
|------------|-------------------------------------------------------------------|----|---------|
| GO.1903557 | positive regulation of tumor necrosis factor superfamily cytok    | 6  | 0.00233 |
| GO.0051247 | positive regulation of protein metabolic process                  | 33 | 0.00237 |
| GO.0006954 | inflammatory response                                             | 16 | 0.00252 |
| GO.0042176 | regulation of protein catabolic process                           | 16 | 0.00252 |
| GO.0031536 | positive regulation of exit from mitosis                          | 3  | 0.00254 |
| GO.0022607 | cellular component assembly                                       | 39 | 0.00261 |
| GO.0002252 | immune effector process                                           | 16 | 0.00278 |
| GO.0031572 | G2 DNA damage checkpoint                                          | 5  | 0.00281 |
| GO.0034502 | protein localization to chromosome                                | 5  | 0.00281 |
| GO.0001934 | positive regulation of protein phosphorylation                    | 23 | 0.00285 |
| GO.0033043 | regulation of organelle organization                              | 28 | 0.00296 |
| GO.0042531 | positive regulation of tyrosine phosphorylation of STAT protei    | 6  | 0.00304 |
| GO.0007094 | mitotic spindle assembly checkpoint                               | 5  | 0.00322 |
| GO.0032270 | positive regulation of cellular protein metabolic process         | 31 | 0.00346 |
| GO.0033554 | cellular response to stress                                       | 36 | 0.0038  |
| GO.0043933 | macromolecular complex subunit organization                       | 43 | 0.00389 |
| GO.0044818 | mitotic G2/M transition checkpoint                                | 4  | 0.00389 |
| GO.0032467 | positive regulation of cytokinesis                                | 5  | 0.00404 |
| GO.0032435 | negative regulation of proteasomal ubiquitin-dependent prote      | 6  | 0.00429 |
| GO.0051310 | metaphase plate congression                                       | 5  | 0.00458 |
| GO.0070507 | regulation of microtubule cytoskeleton organization               | 8  | 0.00466 |
| GO.0051129 | negative regulation of cellular component organization            | 18 | 0.00486 |
| GO.0000079 | regulation of cyclin-dependent protein serine/threonine kinas     | 7  | 0.00574 |
| GO.0000183 | chromatin silencing at rDNA                                       | 5  | 0.00574 |
| GO.0002366 | leukocyte activation involved in immune response                  | 8  | 0.00574 |
| GO.0006275 | regulation of DNA replication                                     | 8  | 0.00574 |
| GO.0060968 | regulation of gene silencing                                      | 5  | 0.00574 |
| GO.0043549 | regulation of kinase activity                                     | 21 | 0.00584 |
| GO.0045080 | positive regulation of chemokine biosynthetic process             | 3  | 0.00585 |
| GO.0051488 | activation of anaphase-promoting complex activity                 | 3  | 0.00585 |
| GO.0071346 | cellular response to interferon-gamma                             | 7  | 0.00597 |
| GO.0045732 | positive regulation of protein catabolic process                  | 11 | 0.00634 |
| GO.1903052 | positive regulation of proteolysis involved in cellular protein c | 9  | 0.00649 |
| GO.0051439 | regulation of ubiquitin-protein ligase activity involved in mitot | 7  | 0.00673 |
| GO.0051656 | establishment of organelle localization                           | 12 | 0.00673 |
| GO.0060333 | interferon-gamma-mediated signaling pathway                       | 6  | 0.0068  |
| GO.0031401 | positive regulation of protein modification process               | 26 | 0.00683 |
| GO.0071345 | cellular response to cytokine stimulus                            | 17 | 0.00688 |
| GO.0010035 | response to inorganic substance                                   | 15 | 0.00697 |
| GO.0051052 | regulation of DNA metabolic process                               | 12 | 0.0073  |
| GO.0010639 | negative regulation of organelle organization                     | 12 | 0.00799 |
| GO.0019221 | cytokine-mediated signaling pathway                               | 14 | 0.00802 |
| GO.0045842 | positive regulation of mitotic metaphase/anaphase transition      | 3  | 0.00802 |
| GO.0045087 | innate immune response                                            | 24 | 0.00814 |
| GO.0042981 | regulation of apoptotic process                                   | 31 | 0.0082  |
| GO.1903660 | negative regulation of complement-dependent cytotoxicity          | 2  | 0.00821 |
| GO.0030593 | neutrophil chemotaxis                                             | 5  | 0.00828 |
| GO.0060341 | regulation of cellular localization                               | 28 | 0.00851 |
| GO.1902533 | positive regulation of intracellular signal transduction          | 22 | 0.00851 |
| GO.0080090 | regulation of primary metabolic process                           | 83 | 0.00996 |
| GO.0010941 | regulation of cell death                                          | 32 | 0.0111  |
| GO.0002228 | natural killer cell mediated immunity                             | 4  | 0.0115  |

|            |                                                                 |    |        |
|------------|-----------------------------------------------------------------|----|--------|
| GO.0033260 | nuclear DNA replication                                         | 4  | 0.0115 |
| GO.0045937 | positive regulation of phosphate metabolic process              | 24 | 0.0115 |
| GO.0044085 | cellular component biogenesis                                   | 39 | 0.0121 |
| GO.0033993 | response to lipid                                               | 21 | 0.0122 |
| GO.0051640 | organelle localization                                          | 13 | 0.0122 |
| GO.0065008 | regulation of biological quality                                | 53 | 0.0124 |
| GO.1904029 | regulation of cyclin-dependent protein kinase activity          | 8  | 0.0133 |
| GO.0045862 | positive regulation of proteolysis                              | 13 | 0.0135 |
| GO.0001774 | microglial cell activation                                      | 3  | 0.0137 |
| GO.0071168 | protein localization to chromatin                               | 3  | 0.0137 |
| GO.0009314 | response to radiation                                           | 15 | 0.014  |
| GO.0032880 | regulation of protein localization                              | 23 | 0.014  |
| GO.0014070 | response to organic cyclic compound                             | 21 | 0.0141 |
| GO.0032760 | positive regulation of tumor necrosis factor production         | 5  | 0.0141 |
| GO.0045428 | regulation of nitric oxide biosynthetic process                 | 5  | 0.0141 |
| GO.0008284 | positive regulation of cell proliferation                       | 21 | 0.0146 |
| GO.0042116 | macrophage activation                                           | 4  | 0.0146 |
| GO.0046688 | response to copper ion                                          | 4  | 0.0146 |
| GO.0045859 | regulation of protein kinase activity                           | 19 | 0.0147 |
| GO.0040008 | regulation of growth                                            | 18 | 0.0152 |
| GO.0042060 | wound healing                                                   | 19 | 0.0155 |
| GO.0051179 | localization                                                    | 69 | 0.0158 |
| GO.0010332 | response to gamma radiation                                     | 5  | 0.0164 |
| GO.0001701 | in utero embryonic development                                  | 13 | 0.0176 |
| GO.0002639 | positive regulation of immunoglobulin production                | 4  | 0.0186 |
| GO.0007080 | mitotic metaphase plate congression                             | 4  | 0.0186 |
| GO.0009605 | response to external stimulus                                   | 37 | 0.0186 |
| GO.0048660 | regulation of smooth muscle cell proliferation                  | 6  | 0.0199 |
| GO.0007275 | multicellular organismal development                            | 66 | 0.0202 |
| GO.0034421 | post-translational protein acetylation                          | 2  | 0.0202 |
| GO.1902947 | regulation of tau-protein kinase activity                       | 2  | 0.0202 |
| GO.1902969 | mitotic DNA replication                                         | 2  | 0.0202 |
| GO.1902996 | regulation of neurofibrillary tangle assembly                   | 2  | 0.0202 |
| GO.0007596 | blood coagulation                                               | 16 | 0.0215 |
| GO.0050900 | leukocyte migration                                             | 10 | 0.0222 |
| GO.1901214 | regulation of neuron death                                      | 10 | 0.0222 |
| GO.0045471 | response to ethanol                                             | 7  | 0.023  |
| GO.0002286 | T cell activation involved in immune response                   | 5  | 0.0238 |
| GO.0001833 | inner cell mass cell proliferation                              | 3  | 0.0257 |
| GO.0006978 | DNA damage response, signal transduction by p53 class medi      | 3  | 0.0257 |
| GO.0032642 | regulation of chemokine production                              | 5  | 0.0257 |
| GO.0002700 | regulation of production of molecular mediator of immune re:    | 6  | 0.0258 |
| GO.2000060 | positive regulation of protein ubiquitination involved in ubiqu | 6  | 0.0258 |
| GO.0010038 | response to metal ion                                           | 11 | 0.0261 |
| GO.0045321 | leukocyte activation                                            | 13 | 0.0263 |
| GO.0002285 | lymphocyte activation involved in immune response               | 6  | 0.027  |
| GO.0002702 | positive regulation of production of molecular mediator of imi  | 5  | 0.027  |
| GO.0006968 | cellular defense response                                       | 5  | 0.027  |
| GO.0043065 | positive regulation of apoptotic process                        | 16 | 0.027  |
| GO.0050729 | positive regulation of inflammatory response                    | 6  | 0.027  |
| GO.0070887 | cellular response to chemical stimulus                          | 42 | 0.027  |
| GO.1902532 | negative regulation of intracellular signal transduction        | 13 | 0.027  |



|            |                                                                 |     |        |
|------------|-----------------------------------------------------------------|-----|--------|
| GO.0090329 | regulation of DNA-dependent DNA replication                     | 4   | 0.0277 |
| GO.1902229 | regulation of intrinsic apoptotic signaling pathway in response | 4   | 0.0277 |
| GO.0010605 | negative regulation of macromolecule metabolic process          | 41  | 0.0284 |
| GO.0032501 | multicellular organismal process                                | 84  | 0.0284 |
| GO.0051707 | response to other organism                                      | 18  | 0.0284 |
| GO.1903827 | regulation of cellular protein localization                     | 15  | 0.0285 |
| GO.1903532 | positive regulation of secretion by cell                        | 11  | 0.0286 |
| GO.0009991 | response to extracellular stimulus                              | 14  | 0.0299 |
| GO.0044702 | single organism reproductive process                            | 24  | 0.0313 |
| GO.0006468 | protein phosphorylation                                         | 20  | 0.0314 |
| GO.0031324 | negative regulation of cellular metabolic process               | 41  | 0.0321 |
| GO.2001252 | positive regulation of chromosome organization                  | 6   | 0.0324 |
| GO.0044707 | single-multicellular organism process                           | 81  | 0.0327 |
| GO.0045429 | positive regulation of nitric oxide biosynthetic process        | 4   | 0.0329 |
| GO.0051340 | regulation of ligase activity                                   | 7   | 0.0335 |
| GO.0001819 | positive regulation of cytokine production                      | 12  | 0.0343 |
| GO.0043146 | spindle stabilization                                           | 2   | 0.0343 |
| GO.0006935 | chemotaxis                                                      | 17  | 0.0344 |
| GO.0007141 | male meiosis I                                                  | 3   | 0.0344 |
| GO.0042510 | regulation of tyrosine phosphorylation of Stat1 protein         | 3   | 0.0344 |
| GO.2001251 | negative regulation of chromosome organization                  | 6   | 0.0348 |
| GO.0009987 | cellular process                                                | 155 | 0.035  |
| GO.0045143 | homologous chromosome segregation                               | 4   | 0.0355 |
| GO.1901216 | positive regulation of neuron death                             | 5   | 0.0356 |
| GO.0031323 | regulation of cellular metabolic process                        | 82  | 0.0381 |
| GO.0032570 | response to progesterone                                        | 4   | 0.0386 |
| GO.0060255 | regulation of macromolecule metabolic process                   | 79  | 0.0391 |
| GO.1903036 | positive regulation of response to wounding                     | 7   | 0.0398 |
| GO.0009607 | response to biotic stimulus                                     | 18  | 0.041  |
| GO.0051054 | positive regulation of DNA metabolic process                    | 7   | 0.0414 |
| GO.0010498 | proteasomal protein catabolic process                           | 11  | 0.0427 |
| GO.0007127 | meiosis I                                                       | 5   | 0.0428 |
| GO.0071241 | cellular response to inorganic substance                        | 7   | 0.0428 |
| GO.2001020 | regulation of response to DNA damage stimulus                   | 7   | 0.0428 |
| GO.0031667 | response to nutrient levels                                     | 13  | 0.0436 |
| GO.0051704 | multi-organism process                                          | 40  | 0.0436 |
| GO.0001556 | oocyte maturation                                               | 3   | 0.0459 |
| GO.0042832 | defense response to protozoan                                   | 3   | 0.0459 |
| GO.0009967 | positive regulation of signal transduction                      | 27  | 0.05   |
| GO.0018105 | peptidyl-serine phosphorylation                                 | 6   | 0.05   |
| GO.0043066 | negative regulation of apoptotic process                        | 20  | 0.05   |
